# Supplementary material for: Melanocytes in the Skin – Comparative Whole Transcriptome Analysis of Main Skin Cell Types
Source: PLOS journal article supplement (doi:10.1371/journal.pone.0115717), 2014-12-29

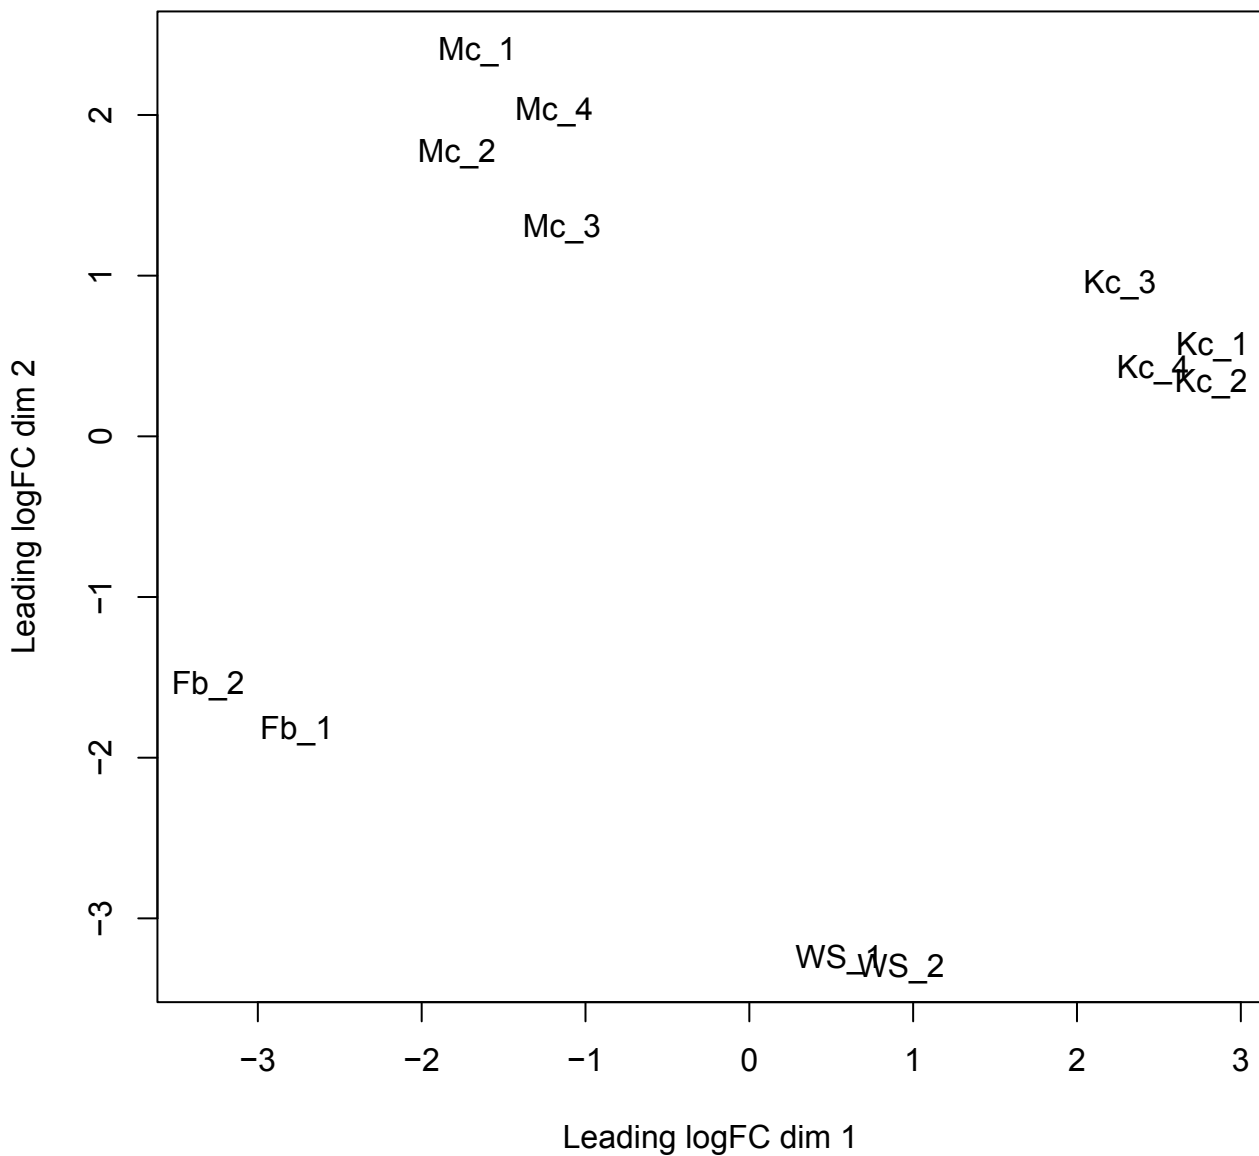

Supplement: S1 (10.1371/journal.pone.0115717.s001) [file journal.pone.0115717.s001]
