# Supplementary material for: Melanocytes in the Skin – Comparative Whole Transcriptome Analysis of Main Skin Cell Types
Source: PLoS One. 2014 Dec 29;9(12):e115717. doi: 10.1371/journal.pone.0115717 (PMC4278762; doi:10.1371/journal.pone.0115717)
Supplement: S1 Table — RPKM values of genes we detected in MC, KC, FB and the whole skin. A gene was considered as expressed only if the RPKM value in all samples of the corresponding cell type was above the cutoff (0.95). Conversely, the gene was labeled as not expressed if the RPKM value was below 0.95 in at least one of the samples. (XLSX) [file pone.0115717.s002.xlsx]

## Sheet: genes_exp_level_colnames.txt
A gene was considered as expressed only if the RPKM value in all samples of the corresponding cell type was above the cutoff (0.95). Conversely, the gene was labeled as not expressed if the RPKM value was below 0.95 in at least one of the samples.
	RPKM values of genes
	Fibroblasts		Keratinocytes				Melanocytes				Whole skin
genes	FB_1	FB_2	KC_1	KC_2	KC_3	KC_4	MC_1	MC_2	MC_3	MC_4	WS_2	WS_2
ENSG00000186092	0.0500009	0.0161001	0	0	0	0.0371697	0	0	0	0	0	0
ENSG00000237683	0.645546	0.687724	1.29487	0.695338	0.914812	1.46565	0.340023	1.48068	0.372665	0.491049	2.21094	1.27969
ENSG00000235249	0	0.0294783	0.0406501	0	0.0267184	0.0226506	0.0249197	0.0175078	0.0126111	0.0111119	0	0.0431191
ENSG00000185097	0	0.0294783	0.0406501	0	0.0267184	0.0226506	0.0249197	0.0175078	0.0126111	0.0111119	0	0.0431191
ENSG00000269831	9.86621	10.8212	12.2441	9.80742	13.3024	16.3486	11.177	7.27143	10.3361	5.08677	8.80705	18.7272
ENSG00000269308	0	0	0	0	0	0	0	0	0	0	0	0
ENSG00000187634	2.21671	2.95949	0.0484887	0	0.0688061	0.0373098	0.0272894	0.0593152	0.0873911	0.0245407	0.209817	0.0804456
ENSG00000268179	0.349054	1.17244	0	0	0	0	0	0	0	0	0.499391	0
ENSG00000188976	6.41622	7.06539	10.7523	6.97518	17.5302	10.6088	9.28098	15.1567	11.406	10.7749	3.46911	2.88905
ENSG00000187961	0.497833	0.390425	0.208649	0.424273	0.17551	0.334026	0.686926	1.18958	0.591099	0.36702	0.222634	0.0619814
ENSG00000187583	0.0346701	0.0679526	0.367001	0.709536	0.229009	0.284298	0.040676	0.0534404	0.020768	0.0183364	0.421188	0.395417
ENSG00000187642	0.0139052	0.018197	0.0936633	0.0418643	0.0980972	0.0829575	0.0151456	0.0428992	0.0154901	0	0.211223	0.121078
ENSG00000188290	0	0.337086	1.98891	0.685238	0.358936	0.228321	0.61446	1.80334	2.65252	0.497068	0.104457	0.387306
ENSG00000187608	4.42239	7.62426	4.79271	1.88388	3.47546	0.397908	24.0485	66.9935	18.5333	17.9215	1.28425	0.509913
ENSG00000188157	0.573288	0.556397	1.10748	1.58563	2.86587	1.86291	0.301327	2.01356	0.893429	0.540664	0.728178	0.521809
ENSG00000237330	0.0908437	0.118165	6.01287	3.20943	0.464715	0.193383	0.21041	0.167408	0.164366	0.330289	0.180829	0.166136
ENSG00000131591	0.37531	0.597586	0.239482	0.640082	0.692659	0.787242	0.764992	1.43143	1.07596	0.690043	0.771118	0.645968
ENSG00000162571	0.0101368	0	0.0784685	0.0913623	0.044427	0.0302184	0	0.054655	0	0.0278596	0.0544779	0.0758249
ENSG00000186891	0.0544756	0	0	0	0	0.301383	0	0	0.0900001	0.0653257	0.401245	0.206319
ENSG00000186827	0	0	0	0	0	0	0.046064	0	0	0	0.0572445	0
ENSG00000078808	18.53	21.6	13.2168	8.98566	8.52527	5.73555	11.3686	18.1238	14.2663	11.5105	4.94877	4.18485
ENSG00000176022	2.61213	3.03317	0.703561	0.661393	0.712664	0.497262	2.31147	2.82236	1.88202	1.73295	0.853601	0.396091
ENSG00000184163	0.087363	0	0.0211939	0	0	0	0.0952923	0	0	0	0	0
ENSG00000160087	7.49128	5.17511	8.69453	9.92521	11.4619	6.38236	6.83219	8.5694	6.55645	5.61753	2.59415	5.20729
ENSG00000162572	0.255464	0.158738	0.0148942	0.514511	0.0284419	0.112083	0.114066	0.182347	0.104052	0.156419	0.192146	0.130771
ENSG00000131584	1.75957	1.81679	1.26868	1.10601	0.966525	1.197	1.41701	2.37512	1.69319	1.36599	3.22339	2.46444
ENSG00000169972	1.13607	0.955	1.63509	1.13287	1.02865	1.23005	0.788221	1.56015	1.37269	1.08041	0.92456	0.301995
ENSG00000127054	8.07265	8.50175	6.48889	6.22704	11.784	10.1626	9.49702	12.7123	8.98342	11.1556	6.33109	4.74705
ENSG00000224051	2.16083	2.0819	6.20024	2.81113	2.45503	1.65008	1.25136	3.0174	3.36641	1.61853	2.2784	1.77373
ENSG00000169962	0.0367346	0.0641439	0.118368	0.11065	0.0143999	0.0547925	0.0300061	0.0377862	0.0545874	0.030138	0.114797	0.060884
ENSG00000107404	2.44975	1.89913	3.60307	5.76929	5.17465	3.61901	2.22605	2.33337	4.08823	1.79264	1.394	1.24785
ENSG00000162576	22.5787	23.5234	0.0210869	0.196294	0.176558	0.256111	0.213683	0.453026	1.06996	0.449446	2.28495	1.25104
ENSG00000175756	9.52198	11.7083	8.56086	13.3086	10.8069	11.1922	11.8546	14.3588	15.3685	14.8472	2.95957	2.9742
ENSG00000221978	16.0639	11.0494	19.4565	19.0408	15.067	11.1506	12.0992	12.8034	9.2673	7.81763	18.1543	13.6962
ENSG00000224870	2.00427	1.6665	1.373	1.99779	1.06833	0.665066	2.75327	2.51808	2.02064	1.33909	1.28701	1.26093
ENSG00000242485	33.4792	38.0362	14.8323	16.3957	35.3996	28.391	44.0075	42.3187	40.5979	60.0386	14.3009	18.8021
ENSG00000235098	0.274173	0.174927	1.00985	0.751541	0.211144	0.504432	0.156913	0.329876	0.441451	0.170611	0.83439	0.493651
ENSG00000205116	0.104665	0	0	0.153035	0	0	0	0	0	0.0997338	0	0.134621
ENSG00000179403	0.523036	0.507965	0.509231	0.280849	0.173801	0.306892	0.257571	0.391667	0.581961	0.759924	0.683719	0.310699
ENSG00000215915	0.756414	0.359277	0.635891	1.11551	0.538148	1.2139	0.533955	0.828923	0.816017	0.623093	0.483851	0.221476
ENSG00000160072	2.72609	2.55178	2.24618	2.30051	2.6432	4.02204	4.49846	6.9947	3.53774	2.89779	0.812791	0.698317
ENSG00000197785	3.11112	3.00617	1.93078	1.62531	5.31077	3.25552	5.33191	7.88477	4.45005	3.96344	0.726156	0.778984
ENSG00000205090	0.663476	0.848484	0.322783	0	0.193305	0	0.507127	0.30385	0.218469	0.384449	0.544819	0
ENSG00000160075	26.586	32.8256	27.8914	30.1789	37.6506	24.2618	67.3848	61.8771	66.3223	83.0301	16.9056	14.2581
ENSG00000215014	0.183343	0.0678147	0.0715	0.10389	0.164969	0.153214	2.4114	0.935205	0.47742	2.77068	0.222169	0.184073
ENSG00000228594	0.555393	0.295234	0.0796191	0	0.048315	0.27594	0.88528	1.84837	1.69251	1.00956	0.525175	0.10259
ENSG00000197530	1.21105	0.913559	1.04231	1.44642	1.06951	0.896555	0.523738	1.3201	0.760567	0.586562	0.408058	0.488729
ENSG00000189409	0.0915132	0	0.0612494	0	0.0889012	0	0.167026	0.051212	0.0691927	0.0566946	0.204085	0.0797475
ENSG00000248333	2.22625	1.92803	1.81781	2.51364	2.62431	3.10265	1.55609	2.74465	0.582077	0.807358	3.06079	3.51965
ENSG00000189339	5.37076	5.04151	2.502	1.77294	1.91637	1.41804	3.98045	4.28295	2.8826	3.81134	4.10316	4.40845
ENSG00000008128	1.01644	1.23193	2.21393	1.95661	1.487	2.18995	1.13836	2.15547	0.601411	0.837132	2.90479	2.22386
ENSG00000215790	2.74218	3.05928	2.14613	1.15334	1.64606	1.08464	2.38182	2.31744	2.0082	2.27787	2.04751	1.30515
ENSG00000008130	6.37477	5.4906	6.33713	3.57999	6.39448	4.34596	11.1741	12.0426	7.92297	7.69505	2.91017	2.81516
ENSG00000078369	73.8632	77.501	74.6732	42.764	77.3042	41.0677	95.9546	101.304	101.055	93.2249	30.7858	27.1572
ENSG00000169885	0	0.078411	0	0.181388	0.0713726	0	0	0	0	0	0.584878	0.077424
ENSG00000178821	0	0	0	0.440509	0.227157	0.284198	0	0	0	0	0.163143	0.186497
ENSG00000142609	0.0163026	0.0213115	0.0963177	0	0.0383181	0.0243081	0	0.00628345	0.0181484	0.0941476	0.0218692	0.0405899
ENSG00000142609	0.549275	0.300942	0.354449	0	0.12861	0.0741465	0.311715	0.0667062	0.455826	1.45103	0.346887	0.337584
ENSG00000187730	0	0	0.0218008	0	0.0132219	0	0.0245435	0.0260123	0	0.0331408	0	0.0281038
ENSG00000067606	0.267029	0.43377	6.20103	2.69081	2.96388	1.74874	0.524738	0.532557	0.999947	0.525924	4.12273	1.32623
ENSG00000162585	2.09338	2.84233	1.98538	5.30394	2.79348	4.09895	3.03003	2.41249	3.72186	3.29215	1.59401	0.590894
ENSG00000269554	0.453691	0.439742	0.189777	0.0467266	0.190713	0.0591537	0.200366	0.367891	0.211367	0.0935785	0.371076	0.0506771
ENSG00000203301	0.07196	0.162189	0.094473	0.0547311	0.036819	0.109542	0.0415339	0.0577305	0.0140251	0.178881	0.253862	0.127092
ENSG00000157933	1.5329	1.34203	0.963754	0.870775	0.753435	0.588066	0.73332	2.4984	0.718572	0.862361	4.30838	2.81931
ENSG00000116151	0.472418	0.359055	0.214951	0.45939	0.256424	0.0435229	0.127407	0.205831	0.341518	0.386613	0.161829	0.24538
ENSG00000269753	0	0	0	0.496026	0.131178	0.167666	0	0.171537	0	0	0	0
ENSG00000157916	61.7724	50.0648	72.8689	47.0229	61.8492	42.4338	64.5132	67.6347	71.1374	56.7991	25.4525	26.2922
ENSG00000157911	5.53121	4.50422	3.11936	1.83673	6.45681	3.21883	6.49531	6.3989	7.03599	5.35354	2.50524	1.4277
ENSG00000149527	0.0997469	0.0462462	4.59167	5.15891	8.01456	7.60919	0.0784795	0.0898355	0.408032	0.0982622	1.72143	1.3501
ENSG00000157881	1.67085	1.31907	1.80774	1.26675	1.07282	1.91033	3.22728	3.51848	2.79918	2.52448	0.762552	1.03658
ENSG00000197921	0.033883	0	0.229882	0.557415	0.158824	0.201782	0.0369409	0.0390428	0.037534	0.132406	0.0457721	0.137971
ENSG00000157873	2.09128	5.23504	3.50166	1.33758	2.93484	1.2491	40.7074	26.288	26.986	21.9107	3.88734	2.27279
ENSG00000157870	2.794	2.68414	1.3622	0.969757	0.852428	1.3636	10.217	10.3771	9.36368	7.44526	1.24762	0.939959
ENSG00000142606	0.816297	1.72505	0.287007	0.0502733	0.21248	1.37131	2.22971	3.23852	2.84534	2.06131	0.125369	0.171338
ENSG00000215912	0.0792071	0.0774518	0.198693	0.0449744	0.220515	0.133848	0.136942	0.217761	0.205097	0.170057	0.34185	0.223642
ENSG00000169717	0.0103172	0	0	0	0	0	0	0.00793011	0	0	0	0
ENSG00000142611	0.0158258	0.0340823	0.021676	0.213244	0.179866	0.0167423	0.024483	0.0138739	0.00329127	0.0221298	0.0278445	0.212687
ENSG00000130762	0.0137844	0.0541196	2.16624	1.1913	0.681557	1.58387	0.0421375	0.11833	0.161405	0.164599	0.571552	0.777779
ENSG00000162591	0.838332	1.12285	0.0220837	0	0.0672527	0	0.00504825	0.0910998	0.560087	0.0225412	1.48781	1.00442
ENSG00000158109	21.6274	18.4779	23.3877	11.9128	6.30038	3.71367	12.0127	8.16973	10.9697	10.2151	8.3958	9.20491
ENSG00000116213	3.82176	3.85768	4.97532	5.95521	5.47388	3.52232	3.49339	4.2975	5.78106	4.10448	1.44104	1.27001
ENSG00000078900	0.00220492	0.0739252	0.0371424	0.0403717	0.0315442	0.0388102	0.00944148	0.00943032	0.0666429	0.042736	0.456459	0.272386
ENSG00000162592	0	0	0.00951459	0	0.00330011	0.0293168	0	0	0	0	0.0924641	0.0245138
ENSG00000235169	0.209868	0.147983	0.205185	0.153414	0.106714	0.155272	0.603013	0.208664	1.1397	0.087987	0.145888	0.305952
ENSG00000130764	1.80922	2.85077	7.85164	3.23619	4.61095	3.8589	6.52147	6.53618	4.2809	3.38404	3.41576	3.32225
ENSG00000116198	5.07862	6.58795	11.3428	6.63028	10.3076	7.06865	6.46594	8.12457	5.14294	6.32904	5.38365	5.15199
ENSG00000169598	0.775398	1.11044	0.38357	0.567775	0.324551	0.81519	1.34516	1.16244	0.925685	0.637192	1.42928	0.456632
ENSG00000198912	9.67531	9.04505	8.95452	5.95712	7.1773	7.42056	6.02566	10.9883	6.53086	8.99955	5.03961	3.08961
ENSG00000196581	0.135607	0.451902	0.726011	0.608109	0.741758	0.579643	0.13856	0.202499	0.193786	0.131965	0.361997	0.374801
ENSG00000131697	0.308482	0.366411	0.362506	0.314316	0.338477	0.273679	0.558334	1.14578	0.502317	0.456194	0.553731	0.529526
ENSG00000268332	0	3.73284	0	0	0	0	51.7949	87.6976	58.8513	52.5164	20.0734	0
ENSG00000069424	1.57946	5.36873	4.35847	1.41183	4.86393	1.85482	87.428	118.585	85.7122	78.617	2.30902	1.97165
ENSG00000116254	0.0173015	0.00568422	0.00417697	0.443128	0.0178262	0.00968372	0.0976557	0.0295225	0.0477334	0.0320291	0.124339	0.0107222
ENSG00000116251	118.693	106.769	143.527	93.1016	110.805	75.382	104.788	84.0204	106.421	141.682	91.2069	65.7119
ENSG00000116237	17.938	20.3518	12.282	7.34703	10.7541	10.0641	29.8562	34.7539	32.5499	30.4601	6.01264	6.92846
ENSG00000158286	0.234612	0.173928	0.188663	0.427263	0.157168	0.366145	0.619422	0.589035	0.228729	0.371452	0.919566	0.510238
ENSG00000173673	0	0.0438113	0	0	0	0	0	0	0	0.0661851	0	0
ENSG00000158292	2.2853	1.90521	0.713093	0.293441	0.180833	0.229324	0.751449	2.78138	1.43418	0.525017	0.411428	0.674665
ENSG00000097021	4.861	6.21013	10.6974	10.6907	17.5295	17.4755	29.8443	47.6843	33.4528	22.4004	2.72904	2.35971
ENSG00000069812	0.192098	0.251015	6.84687	4.34023	4.68859	2.65732	0.379541	0.488253	1.08682	0.386418	2.10456	2.96924
ENSG00000187017	0.156593	0.13588	0.213445	0.78775	0.164631	0.267849	0.0853168	0.180729	0.144871	0.277424	3.4939	1.3606
ENSG00000215788	0.0802307	0.086599	1.35628	1.4605	1.15993	1.28343	0.00583828	0.062215	0.222971	0	1.5115	1.20498
ENSG00000171680	0.326416	0.190257	1.7997	1.47323	2.82074	1.73969	0.131561	0.145961	0.617974	0.284848	2.52435	2.35008
ENSG00000162408	2.19439	2.28835	4.17186	2.36754	3.79585	2.70557	2.5632	4.67915	1.57454	2.13661	2.12479	2.38111
ENSG00000173662	0.0237568	0.155592	0.104107	0.0716257	0.0309344	0.0355656	0.0879347	0.0743962	0.0780889	0.060365	0.0871858	0.119184
ENSG00000204859	2.16904	1.65389	2.86114	1.49979	2.71774	2.4418	1.11668	1.92709	1.46785	1.9209	2.51502	1.6595
ENSG00000162413	3.66658	3.32439	9.08685	6.03598	2.42905	2.57982	2.89046	4.35399	3.52091	2.34281	2.70533	2.13956
ENSG00000116273	1.51115	1.30889	1.71565	0.73395	0.54142	0.730987	0.757092	2.88599	0.724137	0.841739	2.74185	2.38556
ENSG00000041988	1.66853	2.14437	2.12447	2.31018	2.34636	2.34343	2.1339	3.22988	2.30062	2.16949	1.70745	0.750618
ENSG00000007923	6.61075	6.22152	5.64541	3.67436	7.64029	8.22757	5.24588	17.886	4.2695	10.7395	5.1393	4.31029
ENSG00000171735	15.8714	17.543	16.3484	7.86888	12.8979	8.74656	12.0459	17.7619	11.7894	19.6987	6.66887	7.44437
ENSG00000049245	54.5487	46.7662	58.1522	25.7132	29.2903	21.931	49.4405	41.243	46.4121	45.9121	21.9497	23.0621
ENSG00000049246	1.50783	2.0238	5.71402	1.47537	3.11196	2.86093	6.05076	9.61031	3.17086	3.38046	13.7362	12.8271
ENSG00000049247	0.435414	0.814274	3.2416	0.856528	1.50046	2.01642	2.82899	4.24929	1.23828	1.41239	4.0392	5.93525
ENSG00000049249	0.0679479	0.15029	0.14654	0.0025866	0.126669	0.100612	0.0339113	0.0322502	0.016596	0.124543	0.0423145	0.117382
ENSG00000116288	83.4191	92.9375	52.531	37.2131	90.4942	63.6971	106.724	97.0472	106.466	136.782	16.7236	17.9673
ENSG00000116285	17.9049	10.5055	41.982	20.7313	74.7381	45.2647	1.86185	2.05942	4.23346	2.33272	7.22326	6.85742
ENSG00000162426	0.141938	0.0231783	0	0.026673	0	0.0132252	0.019328	0	0.084678	0.00871619	0.127008	0.0441972
ENSG00000142599	4.21783	2.05231	3.57174	5.05668	2.78626	3.03769	2.73726	4.92712	3.71651	4.7365	18.3558	5.72094
ENSG00000074800	231.808	227.559	322.24	208.578	723.912	398.761	285.148	381.147	411.462	409.308	80.3622	89.9304
ENSG00000131686	0.103066	0	0.0861951	0	0.0567832	0	0	0.0335705	0	0.0944138	0.6339	2.53616
ENSG00000197241	0	0.0369119	0.0274957	0.0425311	0	0	0	0.0218307	0	0.0277874	0	0
ENSG00000142583	3.58709	0.320516	0.343153	0.112284	0.370852	0.466524	0.31885	0.315844	0.366845	0.283546	0.575223	0.545171
ENSG00000180758	0.804465	0.469992	4.36898	1.86633	0.965866	1.02563	0.880772	1.20501	3.19296	0.924273	3.00738	8.9321
ENSG00000049239	6.62041	5.24616	1.20186	0.690736	1.70003	0.745777	1.52909	2.05429	1.22534	1.33397	4.5949	3.16119
ENSG00000171621	5.94136	4.76998	8.73996	4.68849	4.65882	2.96086	16.5469	6.66038	8.32858	8.89706	1.83927	2.13211
ENSG00000171612	3.38725	3.16586	3.8369	2.071	6.55313	4.01362	8.30179	7.49947	5.93082	7.19061	1.30968	1.09373
ENSG00000188807	0.262556	0.303215	0.202163	0.367189	0.153878	0.22953	0.950521	4.23997	0.59048	0.685071	0.476037	0.394673
ENSG00000171608	0.970961	1.39306	0.826466	0.502368	0.922141	0.617851	7.91595	12.2328	4.65385	5.18468	0.667795	0.397105
ENSG00000171603	2.28296	2.73048	5.18266	3.32956	6.25243	6.13426	2.69725	14.2259	3.16904	3.0444	10.7272	8.25719
ENSG00000179840	0.0474046	0.00882382	0.0252388	0	0.0357708	0.0397339	0.0166042	0.0912217	0.015433	0.0290497	0.0501118	0.19034
ENSG00000178585	3.78553	3.33023	23.1878	28.5059	16.7267	19.3004	7.65044	6.05394	10.1442	6.81264	17.1071	17.0197
ENSG00000162441	5.53572	9.32963	14.0574	9.08779	9.03975	5.9064	4.804	9.8015	4.06359	8.25351	8.74381	10.5057
ENSG00000173614	3.02813	4.82315	4.39651	2.63361	3.54288	3.19067	4.68475	1.98882	2.73247	3.09842	1.58167	1.45072
ENSG00000162444	0	0.194615	5.73319	9.6963	0.622585	0.680197	0.584437	0.349322	1.50592	1.32386	2.31055	3.40443
ENSG00000130939	3.24786	4.44464	5.24752	3.3229	2.00775	2.29132	1.98692	4.44865	2.08383	3.45042	10.8294	9.42264
ENSG00000054523	7.76896	9.21805	20.5381	8.10759	4.57087	4.27823	4.60723	10.2843	5.31752	7.55376	10.1761	10.6842
ENSG00000142657	22.8438	16.1538	14.261	8.24794	10.7051	12.7232	33.1463	22.6732	35.45	32.4624	12.6732	14.862
ENSG00000175279	5.42773	4.552	2.29726	1.54063	5.85068	6.19437	6.5486	8.37909	7.19251	8.23489	2.21168	2.26408
ENSG00000251503	0.13127	0	0.348457	0.131202	0.333787	0.118542	0.217773	0.19932	0.106743	0.234027	0.246395	5.90064e-07
ENSG00000241563	8.15831e-17	0	0.1472	6.07579e-37	8.04892e-77	0	0.158906	0.0878655	0.108936	0.0498474	0.0537359	0.149488
ENSG00000160049	7.80879	7.04447	7.152	5.86851	10.2116	6.196	7.63932	9.93022	9.37702	7.87671	3.99437	3.33235
ENSG00000142655	2.46581	0.789322	2.26611	2.49874	1.43681	1.81172	1.52374	2.10671	2.41654	1.06871	2.7329	0.87734
ENSG00000130940	0.0503388	0.0815686	1.54935	0.72459	0.272927	0.614379	0.0323627	0.113584	0.0666958	0.0837759	1.57597	1.50079
ENSG00000175262	0.0316268	0.0246237	0.0182439	0.0283401	0.011076	0.0140555	0.039377	0.128944	0.0104886	0.0808652	0.0253224	0.228234
ENSG00000120948	21.174	34.9094	37.743	25.1839	21.4177	31.0575	25.9394	36.7897	22.9871	38.0174	26.5241	22.0786
ENSG00000009724	0.122176	0.159633	0.827258	0.149301	0.184573	0.312264	0.228167	0.349732	0.0971185	0.325877	0.772999	0.891223
ENSG00000116649	13.4973	15.9882	13.1019	13.2424	25.8496	15.9699	9.34832	38.9111	8.70922	15.3263	4.36005	3.6377
ENSG00000171824	9.41626	11.7819	13.7018	7.50136	11.3987	9.49843	10.572	25.2981	11.6105	17.8427	8.23467	7.70358
ENSG00000198793	4.36895	4.93835	9.5052	4.51033	6.28992	5.67558	8.45139	13.382	6.96497	7.29729	4.93006	5.43382
ENSG00000171819	0.152772	0.0623323	0.424936	0.0860905	0.157026	0.398539	0.020805	0.294249	0.159315	0.112528	1.43615	0.904295
ENSG00000120942	3.49586	2.61444	2.07047	0.965369	3.51485	2.02522	4.06861	3.96189	2.58219	3.67835	0.87585	1.40797
ENSG00000204624	0.0292889	0.0209372	0.011563	0.0441259	0	0.0261909	0.0899041	0.0123208	0	0.0157339	0.0106676	0.00990234
ENSG00000116661	0.419682	0.291094	0.677456	0.964249	1.73939	0.33341	0.439588	0.21518	1.44359	0.438256	0.377072	0.314815
ENSG00000132879	2.31798	1.5599	2.70698	1.98523	1.47952	1.43368	3.51248	2.36924	4.74737	2.81007	1.98148	0.886158
ENSG00000116663	3.40373	1.81614	2.95183	3.61623	2.32597	1.56853	3.17297	1.71597	4.43344	1.64369	0.58673	1.42354
ENSG00000116670	6.18814	6.96817	5.09616	7.01485	7.66148	4.00841	9.17679	10.2352	11.1845	8.33038	1.96911	1.40858
ENSG00000162490	0.106539	0.0795185	0.109594	0.0806205	0.109939	0.169241	0.141952	0.137676	0.0694867	0.0799721	0.182005	0.0926485
ENSG00000177674	4.5785	4.90407	4.38369	5.03256	7.69358	5.26356	6.6065	4.76458	7.57144	4.46408	1.15471	0.626105
ENSG00000215910	0.171655	0.0350337	0.0260425	0.0137931	0.031589	0	0	0.09552	0.066578	0	0	0
ENSG00000011021	2.12508	2.06159	3.53563	1.57491	1.09889	1.75276	2.67455	4.03041	1.83814	2.93412	2.25885	1.48719
ENSG00000177000	5.18366	4.03368	3.45365	1.48756	1.48944	2.11113	3.98508	2.83382	4.09839	2.13315	4.76381	3.12834
ENSG00000175206	0.065185	0.0696636	0	0	0	0.563731	0.177402	0.331677	0	0.0525571	0.295201	0
ENSG00000120937	0.195962	0.381566	0.127483	0.191134	0.113156	0.416095	0.2135	0.347218	0.240717	0.343173	0.0817778	0.0364542
ENSG00000116685	4.30167	4.02489	4.28927	3.07036	2.575	2.67615	5.81207	7.19697	8.45049	5.3844	2.00771	1.74229
ENSG00000083444	13.8872	17.048	3.5715	1.66241	2.41628	3.04361	26.5806	24.4266	19.5743	16.4411	1.77927	1.75217
ENSG00000116688	7.50817	8.627	15.7102	11.0598	22.0019	17.2262	15.7596	20.8453	14.651	11.3104	12.673	11.7956
ENSG00000116691	1.12942	0.849387	1.62491	1.50514	1.73013	1.07518	2.56561	2.91129	2.29852	1.5205	0.33879	0.432088
ENSG00000120949	0.0180405	0.0235642	0.0170806	0.0271193	0	0	0	0.027803	0	0.0177243	0.0968694	0.0224727
ENSG00000028137	1.63472	2.00651	0.128898	0.12245	0.0602708	0.128431	0.34611	1.44015	0.516517	0.607606	2.70753	1.2729
ENSG00000048707	3.99372	4.56912	10.6721	4.86544	6.37015	5.16008	3.9362	5.37857	3.41727	3.54468	15.1917	15.0039
ENSG00000162496	9.27323	4.49826	0.590324	0.471771	0.726608	0.382507	2.09705	0.590831	0.16301	0.374023	3.70385	2.79032
ENSG00000204518	0	0	0	0	0	0	0	0	0	0	0	0
ENSG00000188984	0.109349	0.0716439	0.338584	0.201037	0.0514486	0.0462176	0.0416801	0.100042	0.0284466	0.0233363	0.161013	0.0407586
ENSG00000157330	48.7007	102.947	16.1789	126.561	71.6849	51.8888	29.5009	27.2661	55.3475	58.5046	47.3729	19.3412
ENSG00000116726	0.0968926	0	0.0293126	0	0.0284307	0	0.0527939	0.0186434	0	0.023746	0	0
ENSG00000116721	0	0.0468087	0.0387298	0.0332096	0.0130095	0.163624	0.0413897	0.0277633	0.0762525	0.0889444	0	0.0254929
ENSG00000204513	0	0	0.0188167	0	0.0048816	0	0.00352883	0	0.00461713	0	0	0.012148
ENSG00000179172	3.61608	3.91626	8.56258	4.76098	11.5317	4.53076	5.68333	6.75606	5.60878	4.91099	0.869734	0.933821
ENSG00000120952	0	0	0.00513008	0	0	0.0335424	0	0.0118871	0.0411652	0.0103784	0	0.0165492
ENSG00000243073	0	0	0	0	0.00396306	0	0.00286153	0	0.00375078	0	0.031796	0
ENSG00000187545	0.0286671	0	0.0277673	0.0429457	0	0	0.0312464	0	0	0	0	0
ENSG00000204510	0.0154172	0	0.00746853	0	0	0	0	0	0.0130079	0	0	0
ENSG00000232423	0.0116348	0	0.0198259	0	0.0109263	0	0.00716033	0	0	0	0	0.0128044
ENSG00000204508	0.0151763	0	0	0	0.0355893	0.0226015	0	0	0	0	0.0204726	0.0189901
ENSG00000239810	0	0	0	0	0	0	0	0	0	0	0	0
ENSG00000229571	0	0	0	0	0.00497368	0	0.00359585	0	0	0	0	0
ENSG00000204503	0.0101874	0	0.0164295	0.0612105	0.0361213	0.0253079	0.0776972	0.00784671	0.0107885	0.0387797	0.0207738	0.0465707
ENSG00000204502	0.00581738	0	0	0	0.00546313	0	0.0028174	0	0	0	0	0
ENSG00000182330	0.0117082	0	0.00566673	0	0	0	0	0	0.0130079	0	0	0
ENSG00000204501	0	0	0	0	0.00932298	0	0.00280458	0	0.0036767	0	0	0
ENSG00000204495	0.0197819	0.0408817	0.00382804	0.0198135	0.00774494	0.0530769	0.0305327	0.0165083	0.0470385	0.0142436	0	0.00273973
ENSG00000204491	0.0304888	0	0	0	0	0.0227026	0	0	0	0	0	0
ENSG00000204488	0.0129719	0.0506218	0.0973256	0.00686137	0.00805611	0.0245521	0.0165457	0.00528219	0.0258273	0.00375017	0.0215915	0.0114456
ENSG00000204486	0	0	0	0	0.00515261	0	0	0.0118236	0.00487253	0	0	0
ENSG00000157358	0	0	0	0	0.00932298	0	0.00280458	0	0.0036767	0	0	0
ENSG00000204481	0.0204157	0.0439555	0.00497441	0.0204441	0.00799224	0.0547743	0.0315119	0.0170351	0.0469157	0.0146966	0	0.00282816
ENSG00000204480	0	0	0.0162746	0.0606387	0.0120781	0.026949	0.111326	0.00777322	0.0106876	0.0373169	0.00701847	0.0335487
ENSG00000204479	0.00614167	0.0112338	0.0495501	0.00517713	0.00810502	0.0205846	0.0166467	0.0136252	0.0238538	0	0.02904	0
ENSG00000204478	0	0	0	0	0.00488125	0	0	0.0112019	0.00461679	0	0	0
ENSG00000162494	0.0387187	0.0505464	0.103017	0.0290894	0.0985403	0.250105	0.0808516	0.0608997	0.0645984	0.00950551	0.0780039	0.122829
ENSG00000162493	3.59578	9.91337	0.757289	0.388527	1.88859	4.36669	0.0642039	0.266608	0.361283	0.0496399	1.67468	0.59854
ENSG00000116731	6.64317	5.59636	6.61192	4.0348	4.2616	3.81275	3.67604	5.74675	3.28745	4.47205	11.2658	9.96942
ENSG00000189337	1.88782	1.54302	1.64773	1.66457	0.564254	1.26417	2.72314	1.94343	3.35579	1.84012	2.22132	1.58006
ENSG00000171729	0.488432	0.580439	4.61919	0.926392	2.35499	1.61844	3.4254	5.53482	5.28644	3.69056	2.46646	2.29961
ENSG00000204464	0	0.150471	0.235925	0	0.139152	1.03778	0.263676	1.18549	0	0.114121	1.17942	2.02551
ENSG00000142621	0.150684	0.161621	0.103105	0.183082	0.111182	0.0854467	0.490158	0.445445	0.453432	0.101009	0.29155	0.19378
ENSG00000142634	4.66156	2.98618	2.80977	2.949	5.58041	5.73045	4.2144	5.83296	5.14252	4.07662	1.70121	1.07438
ENSG00000162438	0.125476	0.141586	0.128393	0.0927267	0.136628	0.107469	0.200123	0.141729	0.145478	0.111106	0.176783	0.13138
ENSG00000142615	0	0.0321617	0.0484976	0	0	0	0	0.0191212	0	0	0	0
ENSG00000215704	0	0	0	0	0	0	0	0	0.318684	0	0	0
ENSG00000132906	2.47114	2.20999	2.04716	1.46693	1.17452	1.31476	2.90458	2.92946	3.74562	2.70895	1.11577	1.1569
ENSG00000116138	4.97188	5.00647	5.52422	3.47582	3.60458	2.26622	4.04106	4.93687	5.05618	4.45363	2.64401	2.29488
ENSG00000116771	0.455261	0.47832	0.569713	0.141637	0.73511	0.813726	1.13252	0.966009	0.784803	1.02228	0.251038	0.200629
ENSG00000197312	1.66824	1.47071	6.76598	2.66821	2.91245	2.63293	2.56887	4.83463	2.18412	2.57722	4.94355	5.76686
ENSG00000215695	1.50987	2.36181	7.79415	2.97439	3.89846	4.09486	2.47506	6.70698	2.43745	3.01143	1.7045	3.38493
ENSG00000116786	10.2842	8.47881	4.94479	4.65521	4.40147	3.30288	9.1155	8.88346	6.24917	4.9458	3.70722	2.91358
ENSG00000162461	0.296076	0.136928	0.213545	0.210431	0.129376	0.212722	0.142411	0.28312	0.187382	0.237817	0.395452	0.144597
ENSG00000162460	0	0	0	0	0	0	0	0	0.0319138	0	0	0
ENSG00000162458	6.20487	8.12895	14.3082	10.3176	18.2762	9.31903	1.29508	0.921532	3.18108	2.99997	0.899607	1.52184
ENSG00000065526	2.25193	1.45705	6.72095	2.31876	3.33298	5.35686	1.28698	5.45174	2.20805	1.14505	13.2598	12.0559
ENSG00000116809	2.75453	3.48396	4.11851	1.93291	4.49065	5.50057	2.77828	3.69002	4.1898	2.74476	2.46805	1.23022
ENSG00000183888	0.103612	0.21337	0.128698	0.0856524	0.0602925	0.127679	0.230526	0.104062	0.0639858	0.0484112	0.107418	0.1277
ENSG00000173641	2.49529	5.82588	0.0119467	0.125352	0.0623155	0.0394375	0.0109678	0.126909	0.839589	0	0.2704	0.310983
ENSG00000186510	0.0968648	0.0982594	0	0	0	0.0320813	0	0	0.0191296	0	0.0691982	0
ENSG00000184908	0.0563839	0	0	0	0	0.0833741	0	0.0155006	0	0.0325319	0.0270358	0.0250865
ENSG00000185519	0.0256072	0	0.148765	0.0383997	0.0600968	0	0.0279071	0	0.0284323	0	0.103435	0.223907
ENSG00000142627	0.733998	0.525969	18.4728	7.70663	11.1737	11.8753	0.477305	0.770204	1.17955	1.06466	2.94246	1.90896
ENSG00000142632	0.735471	0.388123	0.148209	0.0594118	0.151684	0.667915	0.512708	0.25793	0.359159	0.160904	2.11062	1.64165
ENSG00000204377	0.723849	1.54553	0.929016	0.715517	1.22869	1.56221	1.15806	1.25487	0.631526	0.650741	1.28783	2.47845
ENSG00000132881	0.621934	0.294085	0.611509	0.345906	0.862251	0.631628	0.643883	0.80007	0.407746	0.221384	0.440214	0.466851
ENSG00000037637	2.76298	3.89932	6.3437	3.86793	4.74838	2.81931	4.216	4.31015	4.83623	4.4839	4.07268	3.3234
ENSG00000055070	22.3798	18.9255	16.719	6.4746	13.4926	11.5294	20.1873	27.8592	23.0539	19.7163	4.31242	4.40485
ENSG00000187144	0.502451	0.365766	0.421191	0.169606	0.312077	1.08071	0.552959	0.429332	0.325762	0.381728	0.840695	0.679446
ENSG00000157191	25.3409	19.7614	8.86762	7.32401	5.45048	3.66685	17.5683	11.2626	17.2382	11.7642	6.30011	9.28616
ENSG00000268674	0	0	0	0	0	0	0	0	0.108805	0	0	0
ENSG00000219481	6.29134	10.2269	5.88704	5.13166	5.05978	4.00037	3.24332	3.31244	2.2535	4.26252	5.51564	6.41882
ENSG00000237847	0	0	0.0488763	0	0	0	0	0	0	0	0	0.0770735
ENSG00000268991	0	0	0.0488763	0	0	0	0	0	0	0	0	0.0770735
ENSG00000058453	0.252032	0.558948	0.190414	0.208828	0.175715	0.524397	0.42918	0.936439	0.183149	0.614404	0.57486	0.404031
ENSG00000117122	9.1055	12.6786	2.98362	2.13753	3.5133	2.38671	5.99182	7.08577	10.1556	9.18616	0.977366	1.3019
ENSG00000159363	638.556	928.443	830.487	2917.29	1434.4	2655.84	496.13	754.702	585.895	680.409	2056.5	3609.12
ENSG00000117118	34.687	33.3186	28.5978	24.0539	48.4893	36.1911	74.6073	75.113	81.1864	68.7797	16.6906	20.9021
ENSG00000117115	0.0225025	0.00126036	0.0355078	0.0289847	0.088345	0.0908285	0.0295172	0.0321524	0.0604456	0.0449247	0.326307	0.135547
ENSG00000142623	0.0148385	0	0.429441	0.177843	0.0870574	0.131984	0.13645	0.0294233	0.0531869	0	0.480551	0.212051
ENSG00000142619	0	0.0403577	0.00638701	0.11936	0.139822	0.236476	0	0.0407654	0	0.156044	0.00885137	0
ENSG00000159339	0.217505	0.399755	0.219374	0.713102	0.294164	0.74365	0.22001	0.38441	0.0694793	0.192732	0.573878	0.273736
ENSG00000269468	26.7432	27.4292	27.856	33.8968	31.3592	44.7172	30.9317	28.7835	21.7948	24.5028	47.8378	37.1459
ENSG00000179051	3.89472	6.09384	34.0652	12.4886	16.56	16.3333	21.735	34.5125	14.4767	23.0473	9.3127	11.6709
ENSG00000074964	1.30688	1.87643	1.53484	1.15956	0.512918	0.629675	1.57418	1.05045	2.37084	1.34104	4.14766	3.64279
ENSG00000117148	0	0	0.0224472	0	0	0.0345574	0	0	0	0	0	0
ENSG00000117154	0.0443141	0.0288897	0.0478492	0.0665261	0.0780433	0.0990625	0.024143	0.0170601	0.098501	0.0434733	0.267914	0.0276421
ENSG00000179023	0.376049	0.22147	0.182996	0.0807183	0.380343	0.153586	0.331769	0.336965	0.261854	0.433678	0.0825839	0.0868802
ENSG00000009709	0.0377181	0.00984667	0.0241625	0.0169762	0.0441514	0	0.0556755	0	0.0383668	0.105907	0	0.060562
ENSG00000179002	0	0	0	0	0	0.0498499	0.00910524	0	0	0.00821581	0	0
ENSG00000159423	1.45736	1.52368	3.47485	2.40814	4.92105	3.08149	3.68346	3.66873	3.86472	2.86813	1.58951	2.01319
ENSG00000169991	1.41897	1.27677	36.0973	13.2345	12.3444	11.5287	1.63095	2.08457	3.40711	2.41613	5.03851	8.25798
ENSG00000127481	5.39251	6.39492	24.7244	11.0377	10.9141	12.5704	6.18417	15.0577	6.90402	5.83756	10.8764	10.354
ENSG00000127463	1.63355	2.83806	8.03658	2.04219	4.11534	3.88514	4.21766	10.5187	2.92724	2.71656	4.22264	2.99138
ENSG00000053372	6.06259	7.86601	5.31156	4.63618	11.6054	12.4165	11.975	15.5089	10.3935	12.1647	3.08429	3.21542
ENSG00000211454	0.78304	0.995824	1.29605	1.02022	1.35075	1.15007	1.21576	1.05805	1.29306	0.99805	1.06066	1.07954
ENSG00000162482	0.243113	0.264238	0.114623	0.0602369	0.18705	0.192131	0.129016	0.242377	0.293426	0.18851	0.125229	0.0739327
ENSG00000053371	12.7213	12.8205	5.32799	3.93996	5.86697	4.25445	11.4447	14.0449	13.2349	14.1854	3.24619	3.68048
ENSG00000040487	3.1991	3.01267	4.99042	2.05833	1.29747	1.65571	3.56324	5.63364	4.06773	3.47997	0.976642	0.436404
ENSG00000077549	65.7919	67.8278	38.822	22.5277	39.3213	30.8052	46.6781	48.4885	40.6499	44.835	28.6767	28.8671
ENSG00000270136	27.1403	24.8049	12.4981	10.3819	18.7084	11.991	25.5739	32.8664	19.3004	28.5004	6.46684	7.59191
ENSG00000173436	4.96418	5.237	3.48605	2.16535	4.51569	3.91668	5.86765	4.72969	3.96806	6.76699	3.24823	2.96703
ENSG00000158747	33.3099	19.4812	2.32729	2.00183	3.40662	4.51777	16.8031	23.9906	7.74015	10.9926	9.75187	8.12437
ENSG00000158748	0.0216742	0.0282662	0	0	0	0	0.00969959	0.0190742	0.0481839	0.0283556	0	0.05407
ENSG00000162542	2.01833	1.30306	0.354948	0.256511	0.58123	0.743603	0.667313	1.2757	0.819099	0.712594	1.32656	0.6945
ENSG00000178828	0	0	0	0	0	0	0	0	0	0.0347262	0	0
ENSG00000169914	1.35943	1.20468	3.15501	1.43528	1.7056	1.13631	1.50638	1.4387	1.04657	1.31037	2.02333	1.64175
ENSG00000188784	0	0	0	0.132914	0	0	0	0	0	0	0	0
ENSG00000188257	0.423052	0.133607	0	0	0	0	0.0566436	0	0.0518788	0	0	0.814841
ENSG00000127472	0.0385238	0	0	0	0	0	0.0140033	0	0	0	0.208552	0.290097
ENSG00000117215	0.0751573	0.0296345	0.0718008	0.0707974	0.0791557	0.129872	0.131168	0.190436	0.157201	0.0949234	0.114324	0.227694
ENSG00000158786	0	0	0.285946	0.0702383	0.00914564	0.16244	0	0.107982	0.0346559	0.0153031	0.0417401	0.610096
ENSG00000187980	0.157431	0.111875	0.173953	0.0953172	0.141204	0.0768406	0.116479	0.257159	0.129585	0.135636	0.0446495	0.140248
ENSG00000162543	0.0298307	0.0587247	0.0144099	0.016874	0.0131656	0	0.0527824	0.149729	0.108196	0.0441286	0.323997	0.212845
ENSG00000158816	0	0.0142262	0	0.00357874	0.0209552	0.00472261	0.0141253	0.0300116	0.0158877	0.00876199	0.127046	0.119106
ENSG00000162545	23.7135	14.4951	2.0991	1.2945	1.48483	1.71929	0.217378	0.990321	1.70859	0.471905	1.17454	0.476059
ENSG00000090432	6.64096	5.67421	13.5448	6.06972	5.29787	5.60191	10.6996	12.2451	12.1197	7.38453	1.99364	2.48124
ENSG00000183114	0.0164539	0	0.0169746	0	0.0483409	0	0	0.0253663	0	0.0323492	0.110367	0.0204844
ENSG00000158825	0.521252	0	0.598051	1.41124	3.37991	1.47983	0.103393	0.0726108	0.732132	0.0921449	0	0.059667
ENSG00000158828	6.53771	4.41635	2.62931	2.11081	1.6117	1.06995	1.98883	2.0836	3.04462	1.66969	1.01947	1.25042
ENSG00000244038	133.887	99.1368	70.9671	37.9809	109.51	45.2045	107.757	72.1011	105.119	95.308	19.0025	13.4292
ENSG00000117245	0.257504	0.0615873	0.170429	0.584289	0.152065	0.350664	0.147217	0.104293	0.434312	0.196763	0.214766	0.111727
ENSG00000189410	1.26788	1.05646	2.42218	5.11746	8.46079	3.5872	0.0123286	0.157229	0.492173	0.334321	0	0.146362
ENSG00000127483	45.8806	56.4652	37.3696	19.5083	49.7848	41.7907	63.7208	75.2612	58.8428	69.1596	33.9468	29.7224
ENSG00000075151	14.6449	16.4413	12.2942	7.68878	11.0049	9.94087	12.373	16.7104	11.2328	12.0363	7.17555	10.5688
ENSG00000117298	6.20414	7.02224	5.86901	3.64572	2.11529	2.72629	1.08882	4.0095	1.22766	1.48139	5.14025	3.41829
ENSG00000142794	8.9298	4.55192	2.71901	1.98154	1.95694	2.0639	4.59931	3.4616	2.24031	2.16094	2.54771	3.05842
ENSG00000162551	0.279672	0.204397	0.038321	0.122849	0.150267	0.0969928	0.0106263	0.0355525	0.164272	0.0906518	0.16566	0.128066
ENSG00000076864	0.0132986	0.087041	1.19579	1.98164	0.964254	0.315402	3.48347	3.07898	1.00315	2.06573	0.249463	0.505907
ENSG00000090686	18.9679	16.3556	13.5536	15.5626	16.9452	18.3268	31.4031	30.8904	26.5878	25.287	16.5392	14.8654
ENSG00000187942	0.0834517	0.0490039	0	0.00785992	0.0887678	0.0933705	0.01136	0.00805045	0	0.147679	0.256025	0.0712707
ENSG00000142798	2.84115	4.12452	1.47357	1.1815	2.71409	2.36585	1.47573	12.8705	2.05188	1.77071	9.67144	8.59789
ENSG00000219073	0.219596	0.0294459	0.0404053	0	0	0.0678762	0.0226082	0.177862	0.0441127	0.132101	0.0797648	0.2657
ENSG00000142789	0	0	0	0	0	0	0	0.0998072	0	0.050453	0.102451	0
ENSG00000070831	203.438	158.457	339.485	141.312	150.567	93.4111	194.267	121.99	148.556	131.552	77.8852	92.2165
ENSG00000162552	0.269571	0.497497	0.145664	0.0576159	0.161837	0.215914	0.084475	0.187472	0.0397999	0.0598831	1.87501	2.84553
ENSG00000184677	2.27555	2.04311	7.36863	3.00454	2.46585	2.6547	2.43946	3.91931	2.12886	2.13412	3.02421	4.89609
ENSG00000070886	0.0337009	0.0720933	0.0478264	0.0183084	0.0692911	0.0188564	0.0137614	0.0563339	0.0271123	0.0358938	0.0150226	0.0569725
ENSG00000173372	0	0	0	0.0463515	0.0272948	0.0910032	0.0509255	0.0468135	0.0673541	0	0.919092	0.646403
ENSG00000159189	0.0465015	0.110749	0.0787184	0.0689028	0.0900491	0.0861006	0	0.0295096	0.0638079	0.085584	0.442345	0.509917
ENSG00000173369	0	0.13778	0	0.0645767	0	0	0.0775137	0.072256	0	0.0684312	0.318754	0.844017
ENSG00000133216	0.863571	1.03457	0.252178	0.201637	0.158518	0.422685	0.095227	0.0902564	0.112936	0.10563	0.211163	0.508711
ENSG00000215906	0	0	0	0	0	0	0	0.0203911	0	0	0.0535518	0
ENSG00000227868	0.10029	0	0.0977526	0.146767	0	0	0	0.076019	0.109011	0.191381	0.208218	0
ENSG00000004487	13.8454	12.0571	12.9622	7.51845	14.9113	14.8391	16.5398	20.0538	12.8573	17.4533	9.06451	7.75694
ENSG00000169641	7.40767	6.67709	11.8401	4.1211	13.016	9.98428	8.84682	9.02492	6.92651	9.32418	6.18869	5.58272
ENSG00000179546	0.122022	0.155442	0.140653	0.133856	0.0534996	0.0786824	0.0837291	0.0738883	0.0349321	0.0414913	0.0420202	0.0908979
ENSG00000125944	32.811	32.1858	17.6436	11.3393	39.3128	32.6595	38.9829	47.7621	33.6	44.6239	18.8256	19.8098
ENSG00000125945	4.45701	5.20624	2.39285	1.21435	1.74493	1.0912	2.29022	2.35551	2.88453	2.39877	9.3726	7.39457
ENSG00000249087	0.851485	0.397516	0.584753	0.543936	0.516912	0.727676	0.143568	0.367921	0.267634	0.422508	0.770782	0.666749
ENSG00000204219	2.66061	3.13	0.22506	0.475847	0.365362	0.0994282	0.322068	0.404468	1.08318	0.219277	8.87858	6.69156
ENSG00000088280	3.63148	3.26109	0.837145	0.651466	0.225068	0.515193	1.35137	1.4947	2.06158	1.3206	5.76415	5.92791
ENSG00000007968	0.0253917	0.109028	0.107012	0.0209923	0.0402865	0.105517	0.141138	1.07069	0.116521	0.219281	0.363766	0.723203
ENSG00000117318	14.1193	17.7324	0.550712	0.955309	2.03821	2.08772	0.116138	1.32695	2.00498	0.381332	2.30376	1.91401
ENSG00000197880	0.122107	0.0774378	0.121652	0.0581076	0.14153	0.135289	0.103748	0.148632	0.262103	0.0467579	0.256801	0.177373
ENSG00000142676	523.017	416.484	279.52	307.397	464.682	333.223	379.636	321.212	518.023	420.732	373.115	231.217
ENSG00000011007	4.58921	5.19561	9.45811	5.17458	6.64172	4.46313	8.21133	13.0164	5.483	9.15979	3.6684	3.97859
ENSG00000057757	7.98761	8.13424	9.67873	6.41989	8.20874	7.94345	16.8106	16.2279	16.2995	14.5788	10.6241	10.0574
ENSG00000011009	10.3332	7.182	9.35825	6.11031	7.15764	11.2216	14.3687	12.3398	15.8662	9.88245	2.72048	2.82057
ENSG00000117308	5.62858	3.94737	11.4036	10.1727	36.5148	17.5482	17.8434	18.1843	18.3009	15.8483	1.50843	1.46346
ENSG00000117305	8.22528	7.12455	8.58998	5.40787	7.938	2.63684	6.87869	5.40904	5.99909	5.14361	2.14439	2.59148
ENSG00000179163	4.2783	3.99442	3.10509	1.92127	1.63776	1.40661	6.29913	4.04057	5.38212	4.65859	5.28477	4.289
ENSG00000188822	0.09571	0.099898	0.0723742	0.0736357	0.135068	0.20122	0.139138	0.161449	0.076236	0.0877816	0.154773	0.124601
ENSG00000189266	33.8312	45.1828	50.2962	44.5595	74.6731	76.2177	36.6331	58.1585	33.2879	53.8349	24.4411	38.8912
ENSG00000188529	23.7822	24.6053	12.8571	10.0652	29.3282	18.9299	26.8486	35.0573	25.2559	29.0344	17.5222	14.9499
ENSG00000142661	0.0824107	0.0618107	0.0757428	0.0332158	0.118739	0.0656758	0.07429	0.0613286	0.135028	0.143678	0.198946	0.257372
ENSG00000142677	0.0151293	0	3.39422	0.614643	0.0533509	0.112805	0.0494395	0.0699911	0.117935	0.0892776	3.26603	2.74864
ENSG00000185436	0.116857	0.0789098	1.18466	0.913661	0.752273	0.669912	0.0516204	0.258093	0.343781	0.0876643	0.75548	0.911519
ENSG00000158055	0.138433	0.108783	21.8958	12.7103	6.87913	4.7771	0.214954	0.113667	0.261041	0.252859	8.24841	11.7
ENSG00000001460	1.82915	0.868522	12.308	1.62628	6.00316	4.16927	2.15838	2.18722	2.02341	1.18441	1.12999	1.48293
ENSG00000001461	4.35448	5.09068	7.6783	5.10864	7.19081	6.03498	6.50346	3.71139	6.98543	5.67591	5.49597	4.66679
ENSG00000117602	2.32021	2.58968	4.33183	4.28523	2.35392	2.26616	6.59495	8.00993	7.02549	5.93705	6.4322	4.81076
ENSG00000184454	0.119914	0.153163	0.176778	0.257473	0.0927988	0.169174	0.170494	0.1207	0.187544	0.175441	0.56845	0.286712
ENSG00000133226	4.67859	7.02495	10.2425	8.95791	7.41602	10.3997	5.13956	12.216	4.04597	5.96715	19.1474	15.0221
ENSG00000169504	74.5923	114.249	61.8659	24.1055	61.1957	22.7839	46.6291	66.4573	46.5986	64.7508	16.3531	17.6805
ENSG00000020633	0.202102	0.246172	0.05611	0.154502	0.165806	0.105648	1.03712	3.11201	1.65897	1.29118	0.727395	0.282195
ENSG00000117614	31.3435	21.2974	42.0203	13.8779	18.8883	8.76613	16.891	11.4819	19.4562	14.1996	13.8223	12.5024
ENSG00000117616	8.89572	9.52546	11.9574	9.21984	4.85927	4.19901	6.69615	5.67786	6.41525	7.27532	16.785	14.3685
ENSG00000188672	1.0017	1.14647	1.16939	0.702207	0.635828	0.1724	0.926605	0.93957	0.508382	0.763843	1.07163	0.599999
ENSG00000183726	28.4142	29.0893	24.3355	8.77254	11.307	6.22429	22.3835	20.1793	18.8475	20.7755	11.0182	10.4153
ENSG00000187010	0.156575	0.169924	0.18308	0.0636838	0.127184	0.171895	0.117486	0.152534	0.0830248	0.143389	0.757086	0.429233
ENSG00000204178	3.65311	5.09394	5.8137	3.69824	2.15326	2.78221	5.50501	4.99029	6.18475	4.28232	3.97034	4.55656
ENSG00000157978	3.21938	3.22178	3.90271	2.1847	1.92894	2.47555	3.94495	7.3795	3.84998	3.77507	3.617	3.0216
ENSG00000117643	1.29025	1.94004	0.186425	0.148681	0.0858699	0.270113	0.64954	2.01811	0.549061	0.879328	1.46365	0.847678
ENSG00000162430	2.24101	2.8287	1.05072	0.924662	1.11905	1.54534	1.79887	9.52675	2.18323	2.68063	1.917	0.900859
ENSG00000117640	10.8203	10.5875	13.2943	5.50659	6.3782	4.57627	14.5618	11.2636	13.0551	11.7022	4.8009	4.65382
ENSG00000223474	0.452903	0.840411	0.249821	0.660265	0.466603	0.439258	0.199917	0.478056	0.630547	0.289593	0.747509	0.968249
ENSG00000127423	2.17694	2.28203	2.68527	1.19051	3.87606	4.53341	6.41831	6.4112	5.4175	4.95037	1.67845	1.5918
ENSG00000182749	4.10516	2.88233	3.57357	1.58409	2.10122	2.03455	1.2033	1.27096	1.52863	1.19659	3.01214	3.72893
ENSG00000117632	14.2349	31.7055	6.83845	5.55712	22.0859	33.44	65.7768	106.429	50.2147	72.8749	12.3544	16.2408
ENSG00000158006	3.13615	2.40298	5.74817	2.38111	3.60263	1.95492	3.23118	3.42218	3.77337	3.02143	1.91911	2.46805
ENSG00000158008	0.0208469	0.129786	0.0302216	0.0157078	0.0245232	0.093299	0.47108	0.331827	1.35406	0.749616	0.111601	0.0237386
ENSG00000158014	0.0610349	0.0444392	0.0901712	0.0922292	0.0589743	0.178786	0.170673	0.155262	0.114018	0.19603	0.0999863	0.0783517
ENSG00000158022	0.244556	1.91126	0.816813	0.733728	1.1768	1.05674	31.848	36.021	25.5914	29.9529	0.444321	0.335888
ENSG00000175087	1.63516	1.49503	3.88342	1.74985	1.64987	1.27658	2.93562	2.59307	1.78591	2.10105	3.99464	4.92489
ENSG00000197245	0	0	0	0.00716261	0.0336458	0	0	0	0.0318247	0	0.116019	0.278027
ENSG00000142684	0.324477	0.241647	0.0897376	0.173911	0.163244	0.241765	0.2273	0.178418	0.18026	0.113645	0.0935257	0.202477
ENSG00000142675	0	0.0211354	1.16769	0.755442	0.885548	0.516851	0.0691271	0.0305766	0.0931895	0.140944	0.954795	0.724501
ENSG00000188782	0.0112683	0.0293796	0.032602	0	0	0	0.0314455	0.0520532	0.0320032	0.0331592	0	0
ENSG00000130695	1.35977	2.72389	5.24995	1.74558	3.07451	3.58485	5.51673	9.47713	5.79376	6.78665	3.66027	3.61936
ENSG00000142669	53.9868	91.9552	37.8128	32.4795	44.4724	37.7807	8.79894	36.8791	27.3906	25.6384	14.6137	12.4481
ENSG00000169442	0.111534	0	0.109134	0.813624	0.387193	0.164942	0	0.168783	0.120917	0	0.932889	2.3012
ENSG00000158062	4.09608	8.31779	3.33417	3.65547	4.53349	3.08989	2.45691	6.7595	4.36823	4.23969	3.81954	2.22429
ENSG00000176092	0	0.0674608	5.38454	3.68098	1.44526	1.08111	0.109761	0.157991	0.238051	0.41036	1.18681	0.821488
ENSG00000176092	0.0282111	0.036685	5.10958	1.01445	0.727975	0.336171	0.122995	0.0650868	0.187803	0.110464	0.570356	1.26982
ENSG00000176083	0.0274183	0.0539245	0.0897948	0.0874489	0.0553665	0.0465846	0.0169461	0.135833	0.108455	0.0933347	0.347895	0.298352
ENSG00000131914	0.395193	0.321686	0.337151	0.189932	0.336257	0.710672	0.298812	0.42654	0.479461	0.371444	0.43908	0.39991
ENSG00000117682	11.6898	12.7835	11.9378	9.67651	4.92477	7.24021	11.2183	13.1436	9.87402	9.54321	9.66445	8.64771
ENSG00000198830	18.5579	19.8748	24.2812	15.9185	35.039	41.9728	13.2423	39.1474	12.171	24.7513	35.0685	40.2843
ENSG00000117676	1.26525	0.603313	7.18028	4.23621	7.39797	8.03071	1.97373	2.38302	4.64118	2.93042	1.70453	1.89054
ENSG00000117713	0.811732	0.942168	1.56102	2.98299	1.90057	2.79877	1.11037	3.51056	1.32302	0.696034	5.2428	3.83606
ENSG00000060642	4.66341	4.78984	4.72174	3.41603	6.19961	5.09068	4.40924	3.91868	5.09475	4.07582	2.8281	2.57248
ENSG00000204160	3.33581	4.86533	4.62352	2.44065	3.61727	1.41108	2.76434	3.64133	2.23778	2.50997	2.24314	2.53394
ENSG00000175793	3.32392	1.39271	141.066	96.2724	85.3798	107.805	2.23514	5.48992	31.6187	6.79732	29.1556	34.0159
ENSG00000142751	8.88497	10.085	18.6464	11.3734	12.743	12.191	11.8835	11.5837	11.5484	9.24922	4.98346	4.24411
ENSG00000198746	1.10422	1.50979	2.49963	1.95882	0.782263	1.76702	2.10262	2.19601	1.25687	1.71355	0.779164	1.48267
ENSG00000090273	5.91385	9.32039	12.6894	7.62917	13.9237	9.44442	8.42995	22.7974	10.4517	14.6895	4.04238	3.73199
ENSG00000131910	0	0.0501011	0	0	0.045323	0	0	0.0297058	0	0	0.0523893	0.0485823
ENSG00000175707	0.144737	0.157128	4.25603	6.46013	1.98194	1.6175	0.184013	0.111399	0.200965	0.236486	1.65549	1.38534
ENSG00000253368	73.5056	54.7264	33.8119	27.0558	21.536	15.6334	6.14209	4.36679	7.70645	6.90956	1.84682	1.217
ENSG00000158246	0.405016	0.587843	16.7165	9.79567	5.03344	4.93786	0.431425	0.645014	1.42208	0.795845	2.75867	3.58765
ENSG00000090020	0.42477	0.416502	2.86427	1.17013	2.24891	2.36601	0.52442	1.9764	0.868434	0.370131	0.780457	0.683084
ENSG00000142784	1.69703	1.37656	1.6683	1.39218	0.708517	0.969685	1.36358	2.54093	1.70994	0.857282	1.66294	1.75775
ENSG00000186501	8.07773	5.58677	4.40308	2.93758	4.30855	4.66917	9.89038	10.5018	8.05383	7.80048	3.35384	2.5857
ENSG00000142765	1.16613	0.0592127	3.09551	3.4321	4.43324	3.45883	0.0247486	0.105036	0.214511	0.133662	3.92598	6.95476
ENSG00000142733	3.46142	1.88323	1.82972	0.758912	0.344937	0.724837	1.61912	7.09108	2.21274	1.4981	4.59116	4.83571
ENSG00000142748	0	0	0	0	0	0.0677988	0.149182	0.0349371	0	0	0.309351	0
ENSG00000174950	0	0.0311181	0.322032	0	0	0.0681039	0.0499515	0.0184933	0.202728	0	0.78612	0.263679
ENSG00000181773	0.303953	0.343758	0.058822	0	0.0475972	0.0604076	0.651294	1.01452	0.337991	0.765861	0.29948	0.151574
ENSG00000158195	5.36371	6.23485	25.4395	12.8072	14.4523	8.68796	5.51996	14.3826	5.62041	6.65556	16.6273	12.1868
ENSG00000126705	0.231986	0.252831	0.292459	0.337366	0.162138	0.415917	0.13375	0.433468	0.3909	0.192033	0.979528	0.678096
ENSG00000000938	0.244411	0.0609144	0.118282	0.244069	0.28204	0.0568274	0.0338261	0.0818543	0.0864433	0.0417289	0.634628	0.31023
ENSG00000126709	23.9977	34.9966	17.7821	7.8466	13.3959	6.04116	103.192	300.827	188.305	78.0439	2.62482	7.02518
ENSG00000009780	8.48312	5.67213	10.94	5.04179	3.21098	3.03674	9.17302	10.3427	6.11932	6.1501	9.99369	9.61516
ENSG00000117758	10.8748	14.1618	21.0104	6.78567	6.99119	2.79234	6.92297	9.94189	6.41098	8.09395	6.67771	6.20853
ENSG00000117751	15.2022	12.7508	17.2209	12.1133	15.0877	11.3062	18.9686	19.6684	18.7004	16.8001	7.15685	6.6508
ENSG00000268552	3.55803	3.08547	16.037	0	11.4517	5.04576	11.9476	11.9082	5.67139	5.30371	7.08462	3.72222
ENSG00000130775	0.774813	2.69395	2.9408	0.957877	1.13012	0.0785161	22.4997	17.86	33.7385	15.194	1.1303	1.38826
ENSG00000117748	11.0542	12.5466	16.9975	7.51936	15.3443	17.0871	26.8921	39.5752	20.109	29.9486	12.5313	12.0033
ENSG00000130768	0	0.0619097	1.19976	0.501692	0.842171	0.579669	0.0307486	0.104858	0.106019	0.188159	0.278033	0.12078
ENSG00000158156	1.03941	1.41058	1.46211	1.37411	0.462742	0.457922	0.83773	1.52979	1.63947	1.11494	0.348504	0.44103
ENSG00000158161	5.48904	4.36374	6.70152	2.17829	2.6787	2.16388	6.10852	6.86626	8.03399	5.47208	3.87213	3.73325
ENSG00000169403	0.113579	0.0743845	1.54025	0.635908	2.3472	0.889056	0.12348	0.180219	0.56825	0.204462	1.94118	2.67592
ENSG00000126698	26.4419	29.8608	24.1827	10.0271	16.6449	10.2311	27.6448	33.8725	28.7231	34.5834	8.27513	8.96808
ENSG00000215902	0	45.2094	0	0	41.1954	0	0	0	0	0	0	57.5717
ENSG00000269804	46.7646	39.4816	29.3139	17.4839	20.8746	17.4509	41.458	43.3496	46.2984	41.1071	5.86554	7.36542
ENSG00000130770	15.4241	28.0003	39.3438	30.0561	50.5764	33.2255	26.0942	34.2722	38.9676	37.5467	15.8682	17.3095
ENSG00000130766	1.68579	3.25192	15.1096	7.14034	18.1677	11.9265	1.06051	2.14255	1.39726	1.03658	0.211916	0.332855
ENSG00000130772	4.64699	4.80355	11.9154	7.0521	6.701	5.86636	4.74112	6.39683	6.98922	6.42943	1.5965	2.34791
ENSG00000204138	0.701977	0.679544	5.25848	2.67349	1.4133	2.35722	1.20122	1.83679	1.07189	1.03116	3.28052	3.89043
ENSG00000180198	6.8713	6.62648	10.0908	7.82206	6.56687	17.7466	10.2608	19.7664	10.4974	11.327	4.10904	4.05088
ENSG00000180098	5.88598	4.48338	3.10591	2.08099	3.49671	3.882	5.28818	5.17078	4.91694	5.30122	5.17747	2.17213
ENSG00000188060	1.28165	0.751979	0.30157	0.332352	0.0874693	0.117457	0.563585	0.606651	0.799158	0.667472	0.349097	0.253859
ENSG00000120656	14.7352	11.7799	15.6121	8.8491	9.73971	8.13481	9.21896	6.83419	11.2756	9.8862	5.11273	4.72824
ENSG00000162419	2.58118	2.59107	6.55816	3.05103	2.22147	2.1719	2.3576	3.15416	1.52727	2.34871	1.70186	2.63278
ENSG00000198492	19.4413	16.9446	37.3355	23.0597	26.9519	18.3118	24.1169	28.8875	23.9898	31.8549	18.3768	16.9468
ENSG00000116329	0	0	0.0590473	0	0	0	0.15952	0.187765	0.108391	0.0478301	0	0
ENSG00000159023	2.31325	2.76502	9.5672	6.03413	4.16409	3.31394	3.5048	6.21129	5.74656	4.37271	7.29447	8.44134
ENSG00000253304	4.88825	3.5996	1.01962	0.818167	0.649333	0.545891	1.91703	1.84121	2.03749	1.88832	1.57421	1.355
ENSG00000116350	6.42597	7.97239	6.98434	4.85594	8.92135	6.28076	4.89012	8.52992	5.40877	4.9063	4.56859	5.07697
ENSG00000116353	3.64156	3.46299	2.16401	1.60945	7.30657	3.64924	5.49271	5.71905	4.92524	5.68814	1.65424	1.60388
ENSG00000060656	4.30192	2.8429	1.95796	1.1125	0.631443	0.480356	1.95683	4.34471	2.68442	1.69648	0.993655	0.371596
ENSG00000162510	0.0779398	0.0308935	0.00176147	0.110808	0.0147379	0.00951538	0.00666314	0.0655128	0.0527513	0.0224387	0.0667299	0.0383217
ENSG00000162511	0.519251	0.276185	0.111639	0.346782	0.372742	0.172009	0.146666	0.118529	0.278088	0.273852	4.33916	4.19418
ENSG00000162512	3.26008	3.32585	0.731848	0.66549	0.69226	1.05846	7.73032	15.0306	6.30332	8.13329	0.996949	0.608292
ENSG00000134644	15.5374	16.7524	21.0552	9.43607	17.7025	14.9764	13.0068	18.5114	14.0829	14.8777	18.4932	17.4746
ENSG00000084628	0.524702	0.176425	0.0271781	0.0795657	0.124139	0.0993694	0.0371301	0.362507	0.0966172	0.175543	0.0643424	0.259932
ENSG00000060688	15.947	16.1143	18.9204	15.04	27.0475	17.3305	15.4973	26.4526	19.2516	21.3674	8.1803	8.27266
ENSG00000121766	8.29181	10.0288	12.6835	9.62746	10.4908	9.35431	21.62	18.1055	21.356	20.9778	5.91392	3.29038
ENSG00000121769	169.166	101.355	0.2014	0	0.152726	0.462943	0.214558	3.75422	4.67489	1.12456	0.214687	0.332114
ENSG00000168528	4.37269	1.43612	7.07237	5.6686	15.9363	6.82265	0.656613	1.09368	2.17206	1.01557	0.591945	0.865038
ENSG00000268950	1.01748	0.792309	4.23936	1.29252	9.83567	3.56872	0.139282	0.959435	0.686447	1.20243	0.535316	0.494913
ENSG00000142910	3.20814	0.995178	1.48349	2.17876	7.26433	7.11862	0.159972	0.157246	0.662095	0.143325	2.23128	1.55454
ENSG00000121764	0.038199	0	0	0.198551	0.0126113	0.0568502	0.0117024	0.0293192	0.0358164	0.115099	0.0516918	0.0803731
ENSG00000162517	20.3982	18.2307	34.8033	18.358	28.8487	16.3433	23.109	16.3705	23.6279	19.2698	11.179	10.2266
ENSG00000084636	18.7669	22.0853	9.92355	5.52372	5.81083	4.83237	0.876329	0.752246	2.10085	2.55812	4.59256	2.46166
ENSG00000121753	0.628154	0.648626	0.0438167	0	0.238331	0.0168992	0.11389	0.401506	0.315982	0.0892712	0.469202	0.098552
ENSG00000134668	11.9412	7.86064	0.597723	0.0917701	0.0957859	0.222599	0.272846	2.41018	1.0031	0.662053	0.24632	0.0779021
ENSG00000184007	209.988	176.158	130.771	87.1704	123.356	74.6371	99.0209	97.7732	92.9795	81.2181	40.0546	26.4393
ENSG00000212673	0.643394	0.25961	0.571388	0.124754	0.158645	0.550831	0.585147	0.608939	0.156241	0.254107	0.66635	0.540863
ENSG00000121774	8.67158	9.01979	10.3972	4.79046	7.36488	9.61031	4.54622	18.5443	5.0209	6.68067	12.1665	11.6433
ENSG00000121775	4.93718	4.5944	1.57889	1.55556	2.95613	2.69257	2.19783	3.42028	1.62504	2.94171	1.40923	1.83427
ENSG00000025800	13.7501	13.938	27.3976	11.7058	13.7121	10.921	13.4203	16.212	14.4861	12.9053	7.54434	9.72141
ENSG00000084652	10.4036	10.1981	10.5641	4.63396	6.52455	6.76368	11.5676	16.924	10.71	9.59739	6.50547	5.91015
ENSG00000160050	1.82778	0.908506	0.0534657	0.123342	0.19352	1.01575	2.17303	2.46208	1.66073	1.2954	0.745384	0.207726
ENSG00000160051	0.408613	0.608113	0.955002	0.72985	0.64295	0.805598	0.998566	1.46734	0.975475	0.464831	1.2665	0.837603
ENSG00000222046	0	0.0424565	0.063406	0.244724	0	0.438393	0.0713294	0.125683	0.108754	0.0959193	0.132518	0.122912
ENSG00000084623	65.6424	59.6529	40.8242	24.0465	66.8904	52.4496	61.7863	68.1239	68.3703	69.9125	18.8409	17.5178
ENSG00000160055	2.70746	2.87399	2.24354	0.559791	1.44125	2.58722	2.83144	3.23674	2.19241	2.63974	1.57819	0.979203
ENSG00000183615	0.635977	0.630398	0.190011	0	0	0	0.854	1.57374	3.13002	2.21056	0	0
ENSG00000182866	0.0202426	0.0660413	0	0.190539	0.0747525	0.0736466	0.0441107	0	0.087916	0.039745	0.176787	0.403793
ENSG00000116478	37.5669	25.349	26.4721	19.6906	16.5574	19.0632	31.749	27.1697	28.4975	32.3402	13.2169	10.7871
ENSG00000175130	11.7115	11.6059	2.47318	0.612868	1.99323	0.9514	62.4362	36.9274	56.222	59.2896	1.13491	0.494539
ENSG00000162526	0	1.1787	0	0.19163	0	0	0	0	0	0.0314986	0	0
ENSG00000225828	0.205061	0	0.5655	0	0.159308	0	0.149292	0.545032	0	0.0659686	0.187256	0.0867383
ENSG00000160058	9.02985	6.55309	13.2469	5.8442	5.83622	4.46136	10.1469	8.39632	8.84139	7.61843	6.85956	4.42966
ENSG00000215897	0.0650459	0.0610238	0.0667331	0.125185	0.0619295	0.144695	0.0264203	0.158586	0.0623888	0.150287	0.151781	0.1014
ENSG00000160062	3.26232	3.28407	5.59635	3.06167	4.56036	2.21318	3.22974	3.45086	3.25052	3.27209	1.19672	1.72668
ENSG00000176261	12.7117	13.135	29.3436	20.0471	16.9281	6.25509	14.6796	12.816	16.1789	13.0632	2.95478	6.61574
ENSG00000162521	16.1609	26.2105	25.9174	14.5652	14.5075	16.6249	20.5885	33.3966	23.4446	40.3504	20.8298	23.5255
ENSG00000162520	12.1069	17.9833	7.66429	2.84489	4.18536	3.33528	11.9501	12.3068	9.87465	10.4166	6.44215	6.6389
ENSG00000162522	0.345679	0.386855	4.23198	2.19866	1.07812	0.747509	0.462605	1.69922	0.643824	0.562797	4.13308	4.2318
ENSG00000134684	7.40712	10.5996	20.9254	13.7673	27.7373	19.8837	7.2435	13.6141	8.94424	7.13038	2.36976	3.21285
ENSG00000116497	10.7847	12.0439	5.42169	3.76859	5.84616	9.57355	7.81352	11.8988	8.36083	8.04606	5.8872	5.75384
ENSG00000160097	0.0775452	0.060844	0.0149982	0.209997	0	0.0231265	0.109809	0.0717424	0.0518067	0.15251	0.374367	0.106158
ENSG00000121905	0.129409	0.0776114	0.0289304	0	0	0.0444767	0.065105	0.149234	0.0993563	0.043825	0.0201389	0
ENSG00000121900	4.02435	2.64148	10.0962	9.67417	4.49734	5.71642	2.3816	4.0749	6.27777	3.40744	2.96304	3.03326
ENSG00000116514	2.13964	3.03211	12.6415	6.54161	11.7189	7.01718	9.38279	10.1804	6.61858	6.92521	4.34953	3.20817
ENSG00000267885	2.51876	2.26844	4.37945	3.01036	2.39822	4.19005	2.75503	6.29246	1.49113	2.49338	8.18671	4.49283
ENSG00000004455	28.7156	24.2954	28.3765	19.6931	68.9656	47.9808	56.7691	55.9374	82.7879	58.1522	19.163	18.042
ENSG00000142920	0.638134	0.587933	0.230294	0	0.440852	0.235746	1.51469	0.849279	1.45783	1.56905	1.27405	0.104555
ENSG00000116525	0.146762	0.240253	0.839405	0.663108	0.172592	0.396621	0.409235	1.67026	0.449922	0.557785	0.86813	1.29223
ENSG00000160094	1.30436	1.27106	0.73107	0.574947	0.490441	0.633176	1.5122	3.34399	1.46791	1.31411	1.85892	1.21304
ENSG00000184389	0	0.0693933	0	0	0	0	0	0	0.0297261	0	0	0
ENSG00000134686	10.4288	7.56062	1.88304	2.28034	6.78703	6.23043	6.86778	9.96637	6.16871	6.44295	3.3481	2.1792
ENSG00000121903	1.27175	0.99672	0.712194	0.45882	0.530078	0.384782	0.660235	0.897558	0.846735	0.683378	0.697947	0.715053
ENSG00000121904	0.541759	0.81635	0.167165	0.210583	0.16872	0.37826	0.120819	0.210191	0.154935	0.116159	0.158148	0.0603235
ENSG00000176256	0.0182013	0	0.0328362	0.0273596	0	0.0271348	0.00924558	0.0305269	0.0288993	0.00834157	0.0244347	0.063409
ENSG00000142698	0.0128241	0.198289	0.00619837	0.069626	0.0511047	0.0391235	0.0287683	0.0300794	0.00123867	0	0.0790084	0.0139017
ENSG00000189280	0.472085	0.0422561	10.8218	6.94156	12.9938	14.9877	0.248455	0.275186	3.0066	0.461415	6.04427	6.07506
ENSG00000189433	0.0496574	0.0422208	0.417757	0.538008	0.455298	0.856029	0.0162268	0	0.066362	0.0293051	1.31821	0.707012
ENSG00000188910	0.559334	0.188113	19.4553	12.4208	15.2031	18.7783	0.183578	0.401917	3.06001	0.613295	9.39114	8.83307
ENSG00000187513	0	0.027543	0	0	0.062971	0.0211408	0.0877482	0.0108975	0.0235548	0.0622784	0.61459	0.578536
ENSG00000163866	10.3609	10.6703	10.0351	6.70567	7.78021	7.41089	10.7511	18.012	15.9713	17.2151	1.97471	3.86559
ENSG00000116544	0.00585171	0.0292662	0	0	0.0206469	0.0872888	0	0.0565941	0.0271784	0.0165186	0.0470141	0.0202485
ENSG00000243749	16.37	11.9534	1.49789	0.296141	5.05971	2.3673	4.45168	3.77227	5.19481	4.73698	2.43523	2.53961
ENSG00000163867	5.17152	5.39016	10.2552	5.06876	6.02566	4.41657	5.95387	7.12445	4.29469	4.73843	7.21651	7.22474
ENSG00000197056	5.53531	4.12318	15.0169	6.42943	7.14152	5.02746	5.61085	7.2043	5.54558	5.49593	6.18852	5.79198
ENSG00000116560	10.9558	9.12303	27.8347	13.7313	22.9843	23.8736	12.3326	26.2093	13.0958	13.5519	23.8733	19.1663
ENSG00000146463	14.5086	13.8273	13.5032	6.50922	11.2605	7.53082	11.3253	12.0957	11.8742	10.5138	6.92706	7.84209
ENSG00000142687	10.9126	6.14347	9.65458	4.7437	7.21654	5.775	17.8979	14.1549	15.303	13.722	11.9312	9.76406
ENSG00000020129	1.54799	1.92739	3.02817	1.4913	2.31767	1.03093	2.15736	4.55499	2.07121	2.37671	0.996835	0.903404
ENSG00000116819	0.0195449	0	0.056731	0	0.0918293	0.0582689	0.191647	0.225849	0.10869	0.0575759	0.10501	0.365401
ENSG00000126067	11.7106	14.4883	17.1589	6.98595	14.9783	10.4843	12.8391	18.7372	13.3192	19.3935	5.23932	5.951
ENSG00000142686	4.81052	5.21795	0.94912	0.17738	0.600267	0.917585	6.08294	5.11905	5.54234	5.12322	0.719022	0.870785
ENSG00000092853	1.49917	2.51357	0.358012	0.145948	0.856239	2.46226	5.00221	9.6995	3.21713	6.19726	0.719385	0.527052
ENSG00000134698	2.23953	2.40743	2.86104	1.33752	0.98016	0.735599	2.0049	2.09446	1.41157	2.01271	4.64323	4.05397
ENSG00000092847	3.38388	3.63513	3.69629	1.10701	1.80046	1.72771	2.3787	5.6021	2.14023	3.0582	3.77717	3.52447
ENSG00000126070	5.0396	4.25798	7.07315	3.79776	5.57997	4.34899	0.71663	1.34528	2.0556	1.22453	4.93383	3.90945
ENSG00000092850	0.0579864	0	0.0609656	0.0868593	0.0680058	0	0	0	0	0.0606144	0	0
ENSG00000116863	6.05635	4.54335	8.95839	3.94469	4.47768	3.4733	5.82446	7.85617	6.9261	5.42707	2.49062	1.92007
ENSG00000171812	3.98305	3.82369	0.425802	0.367497	0.136577	0.132894	0.0510517	0.151989	0.212136	0.0369619	0.351214	0.721805
ENSG00000054116	30.1254	22.5125	46.8865	26.7646	31.1261	27.6943	26.0818	25.8346	32.901	30.5741	9.09468	10.4061
ENSG00000116871	6.38889	3.1549	4.9281	5.37381	10.4368	10.2907	3.29446	12.2643	6.0076	3.35671	5.23038	4.16448
ENSG00000054118	21.6692	18.934	37.6275	16.625	25.0234	19.128	24.4423	25.1613	20.7611	23.408	14.0159	11.8815
ENSG00000214193	0.110093	0.101235	1.39533	0.894133	0.315591	1.53826	0.171935	0.767728	0.539083	0.186975	1.30931	1.20817
ENSG00000142694	9.66387	7.12428	0.291073	0.0639077	0.426249	0.286895	2.29041	1.8469	2.41507	1.93019	0.232404	0.538715
ENSG00000116883	0.269971	0.369789	0.685943	0.0239964	0.261232	0.438512	0.360705	0.780819	0.419749	0.220191	1.53108	0.889004
ENSG00000196182	1.64471	2.2304	4.87805	2.80518	3.16167	2.8319	3.60253	4.27461	2.95548	2.6545	2.02062	2.09716
ENSG00000181817	7.47315	8.23891	4.39927	5.51074	5.98862	4.4588	11.9359	10.9552	17.1226	15.0417	2.30339	0.964137
ENSG00000116885	3.64096	1.80677	3.34719	1.64905	2.22974	0.950017	2.00819	2.85459	4.45794	2.26259	1.55615	1.93098
ENSG00000116898	21.9566	20.4135	36.2906	28.9525	46.5574	37.3343	36.4066	29.4733	40.9752	35.6006	7.2267	5.8484
ENSG00000119535	0.0362573	0.047359	0.132344	0.0661449	0.112657	0	0.104381	0.137877	0.0957926	0.184431	0.14602	0.349791
ENSG00000163873	0.0242975	0.00283609	0.0313407	0.00136859	0.0169056	0	0.0199015	0.0269191	0.00506207	0.0237353	0.327145	0.267442
ENSG00000163874	1.65235	1.34262	4.09025	2.08801	4.24677	2.57663	0.781706	0.858605	0.897017	0.643971	3.64013	2.01696
ENSG00000163875	14.1	18.7931	24.558	15.9159	15.5674	10.6595	12.6998	13.4411	11.7463	12.0104	10.3576	9.9627
ENSG00000163877	2.39465	1.8049	5.381	1.04909	2.3015	1.46666	1.91003	2.45456	2.00411	2.39293	1.91214	2.0204
ENSG00000163879	0.784711	1.09302	0.0929276	0.114311	0.13175	0.238792	0.819905	0.646287	0.847302	0.472356	0.343688	0.478421
ENSG00000134697	18.1044	16.3825	23.6547	13.478	38.3123	18.6091	20.7615	22.9201	19.6027	22.1147	5.77795	7.25993
ENSG00000169218	3.44701	1.89243	2.64487	6.12276	6.51735	11.7937	7.73109	5.76752	6.89446	4.4707	5.16058	2.73905
ENSG00000116922	2.91142	1.88004	5.31251	2.93923	8.94782	3.8462	2.3471	3.77342	2.37871	2.09292	1.53115	1.32311
ENSG00000134690	0.599462	1.28384	0.300031	0.947046	2.05198	4.47567	3.57075	9.04481	3.91367	4.97446	1.02018	0.715777
ENSG00000183317	0.188936	0.189136	0.209236	0.137695	0.134253	0.191374	0.172184	0.166279	0.105029	0.172246	0.207604	0.142017
ENSG00000185090	0.128327	0.0457488	0.151203	0.315772	0.160497	0.0136649	0.301573	0.0741619	0.197132	0.0946206	0.449928	0.222638
ENSG00000196449	3.93771	3.23408	13.9059	9.51694	17.012	6.6364	10.8132	9.67861	7.80685	9.00794	1.83041	2.76992
ENSG00000197982	15.8588	13.5875	15.4358	9.65707	18.5044	8.06432	15.1946	9.40461	19.1965	13.0449	1.83436	3.32827
ENSG00000188786	1.50643	2.06011	4.71277	0.979343	2.01795	1.48107	1.4006	3.07549	1.50986	1.61771	2.09477	2.34568
ENSG00000230610	0	0	0	0	0	0	0	0	0	0	0	0
ENSG00000204084	3.77557	5.87156	2.60038	1.00497	1.81629	2.53325	5.48195	5.98356	5.10776	4.37223	3.40838	3.17822
ENSG00000183431	19.0077	16.6739	14.2542	10.2132	21.4036	19.0718	19.3154	29.4709	18.1701	22.69	8.4757	8.40355
ENSG00000183386	3.20796	3.26431	0.281238	0.237497	0.557606	0.826019	0.532345	2.57966	1.56804	1.00865	0.960149	0.791765
ENSG00000183520	18.9785	21.7314	18.1643	10.8063	17.9685	16.1092	30.1965	41.0183	25.2615	29.4716	6.55524	6.41036
ENSG00000185668	0.1237	0.0307175	0.183925	0.101111	0.105541	0.121612	0.246185	0.404247	0.19293	0.111248	0.495505	0.333607
ENSG00000116954	15.6891	13.1524	35.4357	10.1499	6.02463	3.39573	10.4516	15.4934	8.85032	8.81253	6.21866	6.55607
ENSG00000214114	2.98856	3.03056	5.59888	2.9603	7.08893	5.6159	4.79464	6.88789	4.62578	5.84248	3.58414	4.42879
ENSG00000131233	0.274618	0.318097	0.941191	0.243259	6.64805e-09	0.487445	0.257554	0.284594	0.295103	0.193594	0.711633	0.33856
ENSG00000158315	0.520301	0.329378	3.49898	2.16594	1.08218	2.1113	0.334685	0.319086	0.514428	0.731675	4.79681	4.9623
ENSG00000174574	19.976	20.5553	77.0744	15.9942	31.8152	22.8441	39.0849	34.5448	31.9939	37.9809	8.84593	12.4406
ENSG00000168653	70.5276	110.815	152.786	56.5751	68.5558	77.7572	177.295	126.317	97.5805	175.699	56.2467	72.2432
ENSG00000127603	24.8094	23.619	25.8972	13.9174	25.3756	34.5041	7.99337	17.0098	12.0328	11.2752	34.052	37.4634
ENSG00000255103	2.5602	3.72569	0.756006	0.363065	0.906285	1.08743	1.66591	4.02256	1.06967	1.57242	3.02673	2.33567
ENSG00000183682	0.0256555	0.0333995	0.0248411	0.13465	0.0150524	0	0	0.0394804	0.0569711	0.037706	0.0690882	0
ENSG00000090621	18.4442	18.0114	33.7879	14.4348	27.972	26.2041	16.9366	38.1143	14.7923	19.0571	21.4872	15.9614
ENSG00000163909	0.0127337	0.0574635	0.0430015	0.0661706	0.0404373	0	0.0499768	0.0707416	0.10859	0.0578408	0.895177	0.256351
ENSG00000116981	0	0	0	0	0	0	0	0	0.0448845	0.0791277	0	0.0509871
ENSG00000116983	0.0171588	0	0.0248694	0	0	0.0256017	0.0140134	0.0198706	0.0478578	0.0338304	0	0.0213008
ENSG00000084072	10.1515	9.77947	17.6843	9.88863	23.5894	14.7447	16.6157	11.8731	17.5238	14.0995	7.06931	4.99181
ENSG00000116985	0.121008	0.151296	0.344349	0.216172	0.110142	0.0707182	0.184712	0.255561	0.0579405	0.0837974	0.838722	0.576046
ENSG00000198754	0.153797	0.154151	0.0648956	0.230773	0.263848	0.0705154	0.0386755	0.0546382	0.113905	0.0773321	0.0159166	0.0147673
ENSG00000043514	5.25489	5.66358	10.6189	4.43784	16.0278	6.31164	3.41448	5.36514	5.48597	6.19236	9.11516	6.97291
ENSG00000116990	0.0350767	0.0793719	1.71904	0.774758	0.683638	0.191834	0.127202	0.16952	0.408548	0.061919	9.65317	6.35937
ENSG00000168389	0.693146	0.375751	4.14191	1.12523	2.34029	4.35681	0.834511	3.6795	1.54582	0.773484	4.33937	5.07101
ENSG00000131236	189.193	170.62	125.529	60.3721	90.7617	113.852	207.079	213.872	202.551	188.18	33.6528	31.7663
ENSG00000131238	15.8473	17.1531	19.8693	12.8295	12.442	18.1487	31.8765	22.9565	29.0267	31.6682	8.89291	8.22726
ENSG00000117000	5.42017	3.91316	14.746	6.55883	5.83948	4.5668	3.47301	5.17563	3.789	3.41839	7.68817	6.64149
ENSG00000188800	0	0.246009	0.18695	0	0	0	0.0233139	0	0	0.0619173	0.26278	0.027053
ENSG00000084073	18.0284	17.7437	23.6573	8.46699	15.6398	11.8987	15.779	22.583	16.4892	20.8276	5.02793	6.79499
ENSG00000049089	0.0886718	0.263786	0.0714519	0.269255	0.225839	0.55096	0.00804868	0.0542738	0.148129	0.0880395	0.0594381	0.0367747
ENSG00000084070	5.28593	4.90111	6.93386	2.27716	2.57897	2.66673	6.42459	8.77038	6.05033	6.47265	6.10332	6.68213
ENSG00000187801	0.536214	0.610843	0.64096	0.163406	1.13047	0.737805	0.686622	0.656066	0.356016	0.673564	0.257332	0.463512
ENSG00000187815	0.932061	1.05905	0.448552	0.583743	0.458514	1.04276	1.68101	1.64441	1.13028	1.81644	1.56396	0.834066
ENSG00000164002	1.93368	2.89075	1.4108	0.827063	0.549648	0.582208	1.92367	3.27133	1.63038	2.1172	1.14788	1.24941
ENSG00000117010	0.681621	1.28964	0.864792	0.583759	0.43708	0.970846	1.78722	1.92949	1.5359	2.30402	1.20019	1.50044
ENSG00000117016	0.0773531	0.0675893	0.235828	0.0896542	0.055468	0.311048	0.09065	0.187704	0.276651	0.324775	0.856695	1.06119
ENSG00000066136	11.2112	12.4252	24.4989	9.70782	17.2391	16.9154	19.1662	26.589	10.4804	14.9018	15.4903	14.9988
ENSG00000117013	0	0.0456871	0	0.0307576	0	0.066656	0	0.0134742	0.0248534	0	0.0819346	0.0837054
ENSG00000179862	0.257546	0.0890676	0.232992	0.308095	0.925471	1.58481	0.0748787	0.0879227	0.494453	0.16771	0.742356	0.47335
ENSG00000171793	5.10137	8.89899	10.9766	6.02171	15.7182	11.8465	5.58447	18.9196	6.00739	12.0746	3.16182	3.78527
ENSG00000171790	0.299002	0.12708	0.286803	0.264381	0.173956	0.184879	0.155688	0.293936	0.133586	0.128388	0.216138	0.243111
ENSG00000010803	4.84776	3.44755	1.57446	1.57151	3.75695	3.19326	4.80806	6.49303	3.43534	4.59188	2.61999	2.19097
ENSG00000204060	0.0177655	0.0580221	0.111703	0.200312	0.0278311	0.026486	0.0451588	0.0273813	0.0593066	0.00872789	0.047691	0.110639
ENSG00000127129	0.322355	0.37136	0.937524	0.695935	0.307702	0.0710884	0.130178	0.110016	0.237931	0.139868	0.290535	0.0449079
ENSG00000127124	0.0437588	0.0376969	0.00501359	0.0478585	0.0129262	0.0409998	0.0206195	0.0885581	0.0205595	0.0660606	0.175862	0.363903
ENSG00000044012	0	0.0523535	0	0	0	0	0	0.125474	0	0.0791785	0	0
ENSG00000197273	0	0	0	0	0	0	0	0	0	0	0	0.0372296
ENSG00000198815	12.3766	9.53574	14.1104	13.3545	14.4948	8.30213	8.78759	13.7138	7.18074	8.15284	14.8073	11.2399
ENSG00000177181	0.0103936	0.0691877	0.0165474	0.0834595	0.00533212	0.0273807	0.0583526	0.0518995	0.193607	0.0521686	0.180432	0.33702
ENSG00000066185	0.0731474	0.0709936	0.211402	0.329198	0.200319	0.162588	0.709183	0.251858	0.242258	0.160317	0.183818	0.170524
ENSG00000127125	11.395	12.745	18.1138	10.0642	21.8412	11.8731	15.9571	16.8545	15.6128	15.0174	8.24884	11.3633
ENSG00000186409	3.01498	4.45287	2.2259	4.42178	2.20254	2.55991	1.27441	2.04821	2.45725	2.37126	4.45693	4.05689
ENSG00000171960	5.84813	5.37835	4.95498	2.9585	13.4124	17.3361	9.79349	15.4835	12.3707	11.5805	8.55976	5.99517
ENSG00000065978	122.492	111.358	151.135	88.2951	193.726	120.301	100.524	154.721	122.839	133.905	45.876	29.8646
ENSG00000164007	0.10274	0.039654	0.116598	0.12444	0.258767	0.122866	0.0505462	0.110819	0.110853	0.0616738	0.107663	0.128742
ENSG00000117385	20.7112	28.9685	2.94998	1.54865	3.93345	3.01937	14.0461	13.1414	12.1997	12.3371	3.69453	2.88267
ENSG00000164008	3.97678	2.21875	2.6693	3.52196	3.45441	2.00125	1.77366	2.18037	3.18506	1.77649	2.05582	2.08543
ENSG00000177868	14.1571	10.1201	13.1744	13.6027	9.62872	5.45949	7.19224	6.51658	3.17713	6.77237	5.92339	5.46957
ENSG00000164010	4.23999	2.77265	0.639706	0.714458	1.95626	1.62815	1.21441	1.05327	1.23156	0.899307	2.4821	1.90926
ENSG00000164011	0.366423	1.16863	0.428557	0.165764	0.37282	0.227809	0.29972	1.47296	0.304971	1.06627	0.499588	1.27716
ENSG00000117394	6.41775	2.55513	20.6836	10.4052	9.05754	11.4695	2.44485	5.71026	4.99809	1.67906	17.2947	10.88
ENSG00000186973	0	0	0.206799	0	1.66804	0.494092	0	0	0	0	0.85469	0.416133
ENSG00000117395	14.9378	14.4847	18.5604	16.7182	47.6264	43.8111	17.6624	23.5461	20.3796	17.0471	4.29055	6.32523
ENSG00000243710	0.161881	0.0492826	0.221445	0.0296842	0.313213	0.496876	0.0686262	0.13217	0.209717	0.207483	0.169007	0.124502
ENSG00000179178	0.438507	0.126218	8.53893	4.56371	2.7708	1.89382	0.0955645	0.0745729	0.891496	0.462761	1.0757	1.4515
ENSG00000253313	0.18446	0.273524	7.0368	3.93998	0.975713	2.30646	0.224856	0.149157	0.612662	0.121325	1.29372	2.55288
ENSG00000066056	0.0161854	0.0207435	0.092908	0.0356479	0.0561565	0.213629	0.0172817	0.146742	0.0528402	0.139653	2.01356	1.73011
ENSG00000117400	0	0	0.021363	0.037285	0	0	0.0481029	0.0191294	0.027606	0	0	0.055073
ENSG00000117399	1.47817	2.85242	1.15508	3.77174	14.971	27.567	11.7572	23.6038	13.3019	15.1931	1.22225	1.36069
ENSG00000066322	36.3196	31.6172	79.3185	27.345	43.0294	40.8434	41.9082	30.8206	41.1055	30.3552	17.2974	25.1231
ENSG00000159479	5.38081	11.4364	16.7402	6.1712	11.4829	7.22867	1.82814	8.78383	3.16394	6.41566	2.70131	5.00904
ENSG00000198198	1.29288	1.33511	2.37538	1.43012	2.32549	2.70564	1.10997	2.26147	1.47884	1.28798	2.79762	2.3487
ENSG00000178922	3.20797	3.31251	1.86615	3.57645	6.0423	5.66843	5.33086	2.53305	2.06976	2.41594	2.33187	1.02839
ENSG00000142949	5.36984	4.00521	21.956	13.3578	19.5266	19.1494	2.20391	2.02278	2.60177	2.39414	30.0732	19.6817
ENSG00000066135	3.51394	4.73311	6.47393	3.49621	5.58357	4.86754	4.44878	4.78168	3.60472	4.86946	4.59781	4.05405
ENSG00000126091	5.07042	3.4015	1.92878	1.79221	10.8313	7.19774	2.07256	3.17348	1.50639	2.04085	2.06119	1.33872
ENSG00000117407	0.574543	0	1.39748	3.47405	8.79669	10.4433	0.113314	0.0632212	0.381064	0.707718	0.462469	0.137182
ENSG00000117408	4.15185	3.92562	5.85459	3.93622	4.17636	3.92607	6.77203	9.55828	8.44691	5.86428	2.01919	2.09802
ENSG00000132768	2.91595	2.53774	6.34336	3.44441	8.02396	5.84234	8.54374	10.039	5.33255	5.62868	1.45192	1.53571
ENSG00000117410	20.9484	19.5141	39.4115	38.6557	24.5085	22.2978	44.1965	36.6069	48.4635	34.729	5.98148	9.18897
ENSG00000117411	15.0645	10.8554	4.99111	7.16433	10.4631	6.67826	8.10794	6.33797	8.12625	5.1081	1.71696	1.96009
ENSG00000196517	0.437624	1.16723	1.70378	1.66005	2.64938	2.48314	0.38405	0.520305	1.05856	0.314856	1.83353	2.26103
ENSG00000159214	0.299734	0.155786	0.348445	0	0.210881	0.133919	0.196034	0.184343	0.0332395	0.0879686	0.16171	0.0750009
ENSG00000171872	0.040666	0.0414057	0.0611345	0.0416121	0.0356234	0.0230957	0.0275007	0.0577021	0.0646774	0.0596113	0.0340823	0.00418655
ENSG00000178028	9.40656	5.36843	9.22631	4.86258	5.47451	3.03649	6.751	8.38648	8.9818	5.58886	5.29718	5.81624
ENSG00000117419	15.7739	15.9409	8.04955	5.15784	15.176	10.1032	16.9193	16.7311	19.7073	15.4883	7.22524	5.06265
ENSG00000187147	4.43968	5.60321	4.44254	4.59703	4.53763	3.66186	4.04287	6.02209	3.84145	3.60241	4.55901	2.71588
ENSG00000126106	2.93556	2.50797	1.50315	1.00857	2.17768	1.28644	4.5541	4.91651	5.01228	4.12549	0.848659	0.98324
ENSG00000198520	0.957268	0.733025	0.62707	0.905932	0.171173	1.06506	1.41451	0.681454	0.310699	0.43342	0.6011	0.749749
ENSG00000142945	2.32687	2.33107	0.966393	0.893758	4.60019	9.81864	12.3895	22.6132	15.22	16.5038	2.30076	1.35953
ENSG00000142937	571.418	625.591	663.013	565.963	709.258	329.838	546.591	390.781	592.932	621.734	391.59	267.919
ENSG00000142959	0.0209721	0.0957566	0.0405894	0.157481	0.0451512	0.171919	0.0875937	0.0619141	0	0.0514572	0.0610684	0.113327
ENSG00000173846	2.3552	2.13364	5.1036	3.1951	4.33512	4.07131	1.26424	4.12375	0.702814	1.03995	1.79774	1.93394
ENSG00000188396	0.316518	0.238578	0.365918	0.551003	0.386798	0.836924	0.153379	0.40514	0.116832	0.137367	0.213215	0.176339
ENSG00000222009	0.81079	1.18139	0.391442	0.505063	0.540438	0.884836	0.882686	1.71002	0.356093	0.56782	0.92829	0.714988
ENSG00000117425	15.6376	64.5041	68.2493	29.0394	56.1431	130.207	112.05	157.16	62.8546	155.08	2.27029	4.39337
ENSG00000070785	11.3639	9.06385	13.3002	9.85699	24.5424	16.8431	11.4192	15.8842	15.2159	12.8488	6.03931	6.3175
ENSG00000126107	5.3019	5.21407	6.88888	3.6518	2.28276	1.43084	8.31492	7.97968	6.92954	4.99195	3.42536	2.442
ENSG00000126088	41.3614	26.128	11.1701	11.6247	15.0407	17.1443	48.9066	25.4159	43.2979	33.6153	8.64911	5.84552
ENSG00000162415	0.107012	0.046821	0.055137	0.0538122	0.117554	0.047906	0.0388399	0.0523387	0.0424662	0.0211096	0.371882	0.336363
ENSG00000186603	0.0959241	0.0937281	0.116075	0.10794	0.0844428	0.0714671	1.7901	2.42721	1.97127	1.63791	0.0322679	0.0299375
ENSG00000132781	6.93167	8.68874	7.30523	14.1035	9.14095	8.92579	7.11074	6.80726	8.8173	6.01612	2.86801	2.07499
ENSG00000070759	0.645324	0.976693	0.92553	0.589432	0.479742	0.414447	1.96223	4.62427	2.90153	1.78136	1.95375	1.99258
ENSG00000132773	1.57089	1.71277	1.75286	0.8462	1.34183	4.52513	3.9288	5.48771	3.0097	4.00919	1.02778	0.918991
ENSG00000236624	0.355464	0.300457	1.73028	1.21966	0.788202	0.305018	0.547558	1.18055	1.17505	0.339951	0.738147	0.408849
ENSG00000132763	2.73685	1.93598	2.36008	1.62077	1.99507	1.83635	7.95429	9.1064	5.32841	5.18149	0.852922	0.753546
ENSG00000117450	134.786	151.513	186.241	96.1307	86.7182	99.5647	138.707	149.763	171.239	156.572	68.1695	75.4373
ENSG00000117448	36.3598	38.913	21.2522	15.9437	30.655	24.6738	22.0936	22.3511	40.5906	24.553	13.8103	15.2873
ENSG00000132780	6.0866	7.13639	4.68851	4.90381	9.5388	19.4744	21.3567	33.8908	16.5169	21.2424	10.7689	8.99051
ENSG00000159588	0.109489	0.150856	0.485374	0.179444	0	0.0890198	0.151824	0.196852	0.0442773	0.208509	0.294174	0.223335
ENSG00000159592	14.5592	14.6233	32.1102	17.6449	23.4451	15.342	11.766	12.8387	14.1845	12.9205	16.3786	16.0193
ENSG00000159596	5.9145	4.7814	10.6362	8.55761	11.112	8.7152	6.91426	7.53429	6.56521	8.11619	3.41547	3.52142
ENSG00000197429	3.99824	4.3178	7.01498	3.67655	2.83003	2.79911	4.61367	4.33446	4.56127	5.05632	3.54437	3.83329
ENSG00000086015	4.06185	5.06529	3.91533	2.15459	2.96689	3.43114	3.8216	9.6834	3.97004	4.09737	3.08452	2.89682
ENSG00000117461	2.25365	1.82005	0.801227	0.430367	1.1966	0.466291	4.72328	3.47803	3.03196	5.69087	0.729298	0.817268
ENSG00000117472	0.512268	0.0701589	1.86685	3.4553	22.9322	17.6355	0.0293849	0.186658	1.06232	0.105619	0.0544822	0.168475
ENSG00000085998	14.9233	11.3624	8.88029	5.10007	12.0068	12.1675	28.8509	26.7	27.7017	22.9642	3.78153	2.77273
ENSG00000171357	1.20892	0.695577	0.306037	0.118185	0.379261	0.248329	1.4227	1.91034	0.773102	0.783659	0.583882	0.387971
ENSG00000085999	0.266705	0.468504	0.153161	0.350964	0.489723	1.72748	1.08949	6.35578	0.640153	1.56521	0.504435	0.484258
ENSG00000132128	12.9807	10.0228	14.1831	7.34156	10.0018	7.73879	13.6693	9.4749	9.91722	9.6326	3.85794	4.9274
ENSG00000173660	55.0021	65.8175	76.7045	60.6074	66.6502	55.2907	105.968	96.9276	120.776	131.523	44.3305	39.6333
ENSG00000117481	4.30162	3.61877	5.39643	4.02837	8.83591	6.81092	8.46995	6.96223	5.94423	7.15982	3.0199	3.07901
ENSG00000117480	0.348112	0.106877	0.931286	0.461368	0.949924	0.949225	0.156175	0.165605	0.364304	0.0804028	1.37574	0.923359
ENSG00000197587	0.0391456	0.107612	0.0624756	0.219822	0.0915649	0.0834367	0.0690115	0.0575895	0.0803617	0.0331735	0.0946758	0.0795207
ENSG00000162456	0	0	0	0.0594153	0.0938012	0	0.0440659	0.0613901	0.132287	0	0.111031	0
ENSG00000079277	6.00837	5.36752	11.2063	3.78153	9.52094	9.05049	5.25568	9.19883	6.01924	7.70632	3.8824	3.48512
ENSG00000142961	4.20247	2.66756	1.22056	1.06936	2.86217	2.03183	1.02448	1.62704	1.66839	0.738606	1.31089	1.13965
ENSG00000123472	19.0324	14.9999	34.7847	18.9822	30.6451	16.1844	33.2035	35.9103	29.8976	24.316	10.9049	15.6938
ENSG00000159658	31.3148	18.6024	27.2938	12.9011	10.7098	10.3334	19.7807	24.5581	20.1773	16.7061	13.3756	14.6154
ENSG00000186118	0	0.137368	0	0	0.0529657	0	0	0.423495	0	0.0934614	0.121448	0.0569729
ENSG00000142973	0.0406273	0	0.0196557	0.609765	0	0.614892	0.225222	0.0766123	0.194012	0	3.46459	4.34224
ENSG00000187048	0.145596	0.0219563	0.0308725	0.0673706	0.0394829	0.0417466	0.076884	0.0852455	0	0.0412809	0.19911	0.122032
ENSG00000186377	0	0	0.0177735	0.0644404	0	0	0.009853	0.0141568	0.367959	0.577584	0.616697	2.05377
ENSG00000186160	0	0.0442146	0	0	0.0265461	0.0336969	0	0	0	0.0221789	0.288882	0.437314
ENSG00000162365	0.0486668	0.0158332	0.0535102	0.0924454	0.0713299	0.0916541	0.0520053	0.090598	0	0.0238302	0.131213	0.214895
ENSG00000162366	0	0	0.319742	1.31326	0.2138	0.326012	0	0.125868	1.08715	0.159542	18.6268	12.5333
ENSG00000162367	0.0885891	0.0291184	0.0678067	0.0966829	0.0596368	0.0732102	0.0847021	0.0783136	0.0596766	0.0573404	0.637304	0.423713
ENSG00000123473	2.29382	3.02783	1.61242	1.39608	1.87611	7.20392	4.89654	12.1282	4.29868	6.37929	2.99608	2.08602
ENSG00000162368	36.2037	38.2863	35.1066	14.2905	25.0495	18.3466	26.0642	30.1082	29.3027	28.3971	18.5858	26.6569
ENSG00000186790	0.0194277	0.0290435	0.0386974	0.09376	0.0674025	0.0364178	0.00558799	0.0252971	0.0790969	0.0156285	0.103068	0.0599057
ENSG00000186564	0.0505409	0.0409418	0.0350477	0.0564782	0.0157416	0.00665357	0.0784449	0.104597	0.162287	0.0676931	0.0536826	0.0840569
ENSG00000204018	0.0111818	0	0.0216449	0	0	0.0999842	0.0243683	0	0.0124267	0	0.0451083	0.0279018
ENSG00000269709	0.497907	0.0806021	0.434622	0.430605	0.0589289	0.187289	0.101478	0.340756	0.0420409	0.113264	0.514912	0.236706
ENSG00000117834	0.0431998	0	0.0186417	0	0	0.0590036	0.129266	0.0743354	0.0587721	0.0802102	0.475065	0.32796
ENSG00000132122	1.08717	2.16407	0.368397	0.25612	0.709052	0.462105	4.8179	5.8788	4.67165	5.31766	6.27902	3.35533
ENSG00000186094	0.132164	0.126122	0.104167	0.0628656	0.153217	0.199483	0.158278	0.166241	0.053325	0.116584	0.130801	0.199098
ENSG00000162373	0.29065	0.230358	0.0244705	0	0	0	0.123946	0.0972404	0.168389	0.371503	0.408302	0.599764
ENSG00000227839	0.380345	0.151812	0.0332162	0.0850256	0.0575465	0.0681862	0.339989	0.337157	0.0953299	0.0542254	0.396715	0.320518
ENSG00000162374	0.22133	0.0308002	0.0531391	0.0110399	0.0302516	0.0462988	0.0298016	0.146941	0.0315756	0.115447	0.0955741	0.0856492
ENSG00000142700	0.0148971	0.0194864	0	0.00560406	0.0282128	0	0.0324535	0.0344601	0	0.00293038	0.0215091	0.0278037
ENSG00000185104	8.17094	6.74081	7.60209	7.26584	14.342	11.8114	5.94218	10.2005	7.50375	7.63144	10.7931	10.541
ENSG00000123080	9.73185	4.46836	0.184195	0.0545274	0.213687	0.21652	4.00122	6.81472	5.60469	4.27539	1.99085	2.05945
ENSG00000204006	0	0.162027	0.0307685	0	0.0737832	0	0	0.116135	0	0	0	0
ENSG00000123091	33.9308	29.2825	76.3203	33.4187	19.8916	10.9375	22.9281	20.1606	21.8996	19.7314	16.8387	18.8828
ENSG00000085831	0.399041	0.211358	8.23574	5.61521	1.58657	5.06978	0.487869	0.426442	0.871217	0.555029	3.49551	5.41076
ENSG00000085832	21.1476	22.6903	18.7832	10.813	21.1252	12.2318	62.2924	40.4774	46.0268	39.4638	19.1035	16.789
ENSG00000117859	19.8421	12.6563	29.1218	11.0978	18.4537	12.3681	35.9601	45.7337	51.3449	38.0948	11.038	9.39846
ENSG00000078618	30.8347	28.6564	39.2673	17.8625	33.2696	22.0593	23.6207	24.3285	24.945	24.322	15.4774	19.9579
ENSG00000169213	6.08553	8.48189	0.60039	0.268676	0.980225	0.323465	0.113568	0.248901	0.401228	0.203446	0.789418	0.287557
ENSG00000117862	14.9425	12.3948	10.1222	7.68528	25.9409	11.7292	14.0484	13.6478	16.0064	14.0865	5.62055	5.35965
ENSG00000134717	30.7374	46.2903	65.166	26.39	78.4122	27.3641	33.6394	31.2058	27.8548	30.4402	17.8597	25.5154
ENSG00000198841	3.7958	4.15154	5.41471	2.9222	2.46473	2.33756	5.51553	4.89723	5.49344	4.83548	0.987966	1.16942
ENSG00000157077	8.45807	5.00355	10.6632	6.62614	11.4903	11.0114	6.03011	5.96382	5.70431	4.87171	8.25636	7.75773
ENSG00000154222	4.07701	4.53419	6.50319	2.99031	2.46461	2.07492	6.92848	8.05929	4.48509	4.4335	2.55842	1.7014
ENSG00000085840	0.906982	2.18735	0.843882	1.03281	0.385575	3.69001	5.0224	9.03993	3.49801	4.95732	2.01956	1.27178
ENSG00000134748	2.64926	2.69661	4.09539	1.57555	3.17702	2.22823	2.43826	3.91271	2.60293	3.02743	3.48288	3.83011
ENSG00000134744	7.69405	5.41769	13.6716	6.35751	10.2869	6.35799	3.56964	4.99818	3.78383	3.30269	10.576	8.19765
ENSG00000116157	16.5575	12.2533	0.526889	0.108289	0.636616	0.647162	6.32081	3.73706	4.85313	3.8195	1.71464	1.0904
ENSG00000182183	0	0	0	0	0	0	0	0.0482457	0	0	0	0
ENSG00000162377	7.60497	7.27277	7.39065	3.94752	8.26003	7.44603	8.44958	10.5357	11.2298	9.6545	2.31683	2.93851
ENSG00000162378	18.0595	12.8833	9.31647	5.45837	6.009	4.66623	12.272	9.12456	12.3625	7.1648	8.05221	7.74065
ENSG00000203995	0.236755	0.344893	0.710132	0.354279	0.241169	0.407818	0.156285	0.743206	0.164331	0.281374	0.276618	0.282102
ENSG00000121310	2.65107	2.31468	4.33589	4.34372	2.6183	2.63199	2.88221	1.95158	2.04606	1.75626	9.51141	5.47844
ENSG00000116171	60.874	56.8301	20.2249	11.147	17.7186	13.8132	43.2594	29.8152	39.6485	35.0028	33.5298	45.4858
ENSG00000174348	7.01208	9.12709	0.0185706	0.0617077	0.00954138	0.118609	0.000982565	0.215359	0.144618	0.0111742	1.61666	1.18509
ENSG00000162383	0.407365	0.378649	0	0	0	0	0.0369408	0.0248076	0.037534	0.0410112	0.137316	0.0400583
ENSG00000157184	1.29927	1.39687	2.59853	1.06988	1.61668	1.06283	4.49623	4.28029	2.88154	3.0211	1.64569	1.78262
ENSG00000162384	17.8672	16.4185	8.62644	8.04941	10.8809	9.07731	14.485	10.9724	14.5662	12.6162	6.7204	4.89304
ENSG00000162385	18.3614	10.5292	15.8422	17.2012	25.2267	17.2943	14.5315	13.9808	14.6261	13.2766	5.21604	7.43775
ENSG00000157193	5.48525	4.58717	1.08099	0.954137	2.8462	6.91349	17.5627	18.8186	12.3137	10.9422	0.679845	0.537336
ENSG00000143006	0.0225615	0	0	0.0169329	0.0264876	0.00305659	0	0.0269695	0.025072	0.0221303	0	0.0340938
ENSG00000174332	0.147501	0.0295298	0.0436637	0.0113238	0	0.00748152	0.0163946	0.176011	0.0335224	0.0452802	0.0807219	0.00936425
ENSG00000058804	4.87199	5.36903	6.35007	3.7167	12.226	16.5815	19.4348	31.1044	20.3929	21.4646	6.06485	4.77643
ENSG00000058799	18.2071	12.6206	24.0666	9.63875	11.8429	6.96337	29.3114	21.2786	33.8633	24.3888	5.62981	7.79697
ENSG00000211452	0.235946	0.0834141	0.086712	0.194545	0	0.0781132	0.0857148	0.131459	0	0	0.124758	0.294792
ENSG00000081870	11.7501	12.9177	7.37436	4.47713	14.9371	8.80515	22.561	29.0514	23.3488	24.5334	9.82319	7.07221
ENSG00000116212	17.2739	17.9575	28.4092	14.0574	19.5852	17.9162	13.5758	17.0002	12.3143	10.0309	5.79442	5.11019
ENSG00000203985	0	0	0	0	0	0.10969	0.100501	0	0	0	0.101495	0.0755693
ENSG00000116209	110.278	108.768	78.0959	54.8627	46.0495	28.084	138.164	78.6782	142.729	106.188	63.7887	75.306
ENSG00000116205	2.05613	1.97034	1.77511	1.468	1.32827	0.806865	2.95371	2.98065	3.48528	2.65459	1.86723	1.77903
ENSG00000212670	0.637102	0.402977	0.593577	0.0475857	0.517624	0.470416	0.460807	0.512011	0.643074	0.427909	0.483862	0.553705
ENSG00000157211	0.0155623	0.0101752	0	0	0.0182913	0	0	0.011998	0.242591	0	0.0208701	0.0193681
ENSG00000248835	0.857608	0.538215	0.514218	0.478212	0.283754	0.397796	0.685616	0.908572	0.901539	0.480285	1.19195	0.431014
ENSG00000215883	1.35874	0.778792	1.05814	0.906586	0.897323	0.778428	1.15475	2.57376	1.36966	0.987599	1.42611	1.54755
ENSG00000116221	4.20981	3.67594	8.45491	6.34826	9.01198	7.84514	6.90538	7.88838	8.23351	7.47787	4.32632	4.24801
ENSG00000157216	3.63846	3.75484	2.79664	1.2838	1.691	1.93271	2.97922	4.53181	3.00514	2.79393	5.2132	4.27954
ENSG00000198711	0	0	0	0.328737	0	0	0	0	0	0.0858668	0.239311	0.554701
ENSG00000162390	0.809612	0.797361	0.993719	0.616059	0.609559	0.920133	0.787974	1.2197	0.453708	0.569886	2.09522	1.64406
ENSG00000162391	0.182198	0.139786	0.37339	0.045513	0.0503395	0.479202	0.0995763	0.132052	0.178707	0.084135	0.288129	0.160406
ENSG00000184313	0.0862318	0.0379535	0.0238168	0.102954	0.0170416	0.0183743	0.0249154	0.0111798	0.0322952	0.0121277	0.76175	0.237581
ENSG00000243725	8.6053	6.36748	12.5099	5.88346	13.7874	8.20814	5.86702	8.81684	7.3537	6.81661	3.79643	4.09905
ENSG00000162396	0.381552	0.593298	1.49399	0.163869	0.619039	0.758433	0.930312	1.02204	1.12197	1.14239	0.341477	0.633751
ENSG00000006555	0.564596	0.391923	1.47702	1.04262	0.574812	0.709061	0.341046	0.445569	0.412085	0.432814	3.48077	3.19573
ENSG00000162398	0	0	0	0	0.0772457	0	0.0287006	0.0202599	0	0.0257963	0.212809	0.065808
ENSG00000116133	39.3307	32.3746	18.1631	14.9904	10.8387	26.4567	84.2995	76.7991	68.2088	49.9554	26.3136	25.356
ENSG00000143001	0.0410026	0	0.0397753	0.122363	0	0	0	0	0	0.0399558	0	0
ENSG00000162399	0.115021	0.115352	0.112813	0.226738	0.110229	0.124798	0.156004	0.0991503	0.085441	0.0644656	0.107287	0.048541
ENSG00000169174	0.387348	0.332536	0.783406	1.25829	2.82943	6.16157	0.37249	0.61873	0.847062	0.494829	0.208558	0.16649
ENSG00000162402	6.89622	5.82238	11.4203	6.26904	9.93169	7.30022	7.17429	8.13912	5.80329	5.66375	7.40374	6.99032
ENSG00000162407	40.8822	67.4641	1.41532	0.365817	0.187939	0.209777	1.11166	1.50957	1.71688	1.14644	21.7357	17.466
ENSG00000162409	0.776184	0.469758	0.108121	0.231693	0.0525765	0.131555	0.0685033	0.0671003	0.105257	0.0545116	0.643074	0.75694
ENSG00000187889	0.0806886	0.0176023	0	0.0202459	0	0	0.043942	0.00518617	0.0824053	0.0132341	0.0270295	0.033448
ENSG00000157131	0	0	0.017506	0	0	0	0	0	0	0.017779	0	0
ENSG00000021852	0	0.216883	0.0203985	0.280884	0.195223	0.433606	0	0.0162335	0	0.265141	0	0
ENSG00000173406	0.548499	0.515722	0.0639694	0	0.0877704	0.222326	0.0354437	0.0396073	0.241616	0.0444989	0.257953	0.287083
ENSG00000162600	6.45952	5.04065	7.95694	5.00475	8.86892	6.17453	7.10418	7.97906	8.06043	6.62758	5.77086	7.04495
ENSG00000184292	0.321594	0.433111	84.1626	31.8476	10.0509	10.4525	0.655579	1.43018	2.89893	1.74117	30.7722	32.2438
ENSG00000162601	5.52553	4.42393	7.46404	3.76383	6.25611	4.47339	5.92316	6.80588	3.33196	4.43974	6.16455	5.71673
ENSG00000177606	6.74939	7.32762	16.1561	9.18421	9.26031	6.31227	1.73885	2.55113	2.59809	1.68383	52.5204	11.4525
ENSG00000172456	2.905	2.12985	1.97299	0.817032	2.20592	1.37921	1.89776	1.60511	1.56059	1.82894	2.16204	1.87838
ENSG00000134709	0.0771962	0.0621954	28.4118	12.0688	7.19013	6.17088	0.420194	0.179026	2.04268	0.645661	3.74505	6.57311
ENSG00000134716	0.136426	0.0296391	0.374136	0.358346	0.253589	0.271075	0.247763	0.262577	0.240031	0.367976	2.93565	1.60777
ENSG00000162598	0	0	0.0819819	0.0318049	0.0497402	0	0.0621998	0	0.0235447	0	0	0.0264125
ENSG00000162599	6.13378	5.15638	17.7077	13.401	22.7455	15.0973	4.70839	7.29162	6.72515	5.34406	18.2238	22.0814
ENSG00000162604	16.0806	15.6152	18.5554	5.93947	10.8982	5.26121	11.0463	14.1002	11.7915	17.2942	6.19612	7.10497
ENSG00000132849	1.35619	1.23017	15.0521	11.1438	10.9501	11.6065	0.709516	1.0518	1.83425	0.907552	14.9408	13.6389
ENSG00000240563	1.08234	1.52376	0.20181	0.107008	0.224769	0.263137	0.172512	0.0663359	0.0442864	0.59857	0.0588845	0.129034
ENSG00000132854	0.965907	1.48515	0.0444109	0.0202151	0.0323042	0	0.0222103	0.0436113	0.130249	0.0772132	0.334628	0.194855
ENSG00000162607	5.84464	8.90644	8.73058	6.78837	11.0712	9.65715	7.38953	18.1965	7.42799	10.2819	9.43907	8.58414
ENSG00000116641	20.6014	17.6647	4.6525	3.21414	10.3737	7.0022	24.9373	22.9405	16.049	21.0315	5.81541	5.87579
ENSG00000132855	0.286713	0.296058	0.131331	0.0681177	0.124164	0.247529	0.427365	0.430497	0.0336089	0.296825	0.0606992	0.394323
ENSG00000269624	0.254159	0.314934	0.182349	0.0970767	0.157575	0.340859	0.75	0.379738	0.170823	0.171344	0.210079	0.506905
ENSG00000125703	4.31586	3.24053	2.48499	2.23016	2.97326	1.97225	8.45507	7.27936	9.44363	8.83763	3.78988	3.76664
ENSG00000187140	0.0472594	0.00386706	0.068263	0.031162	0.0121829	0	1.11901	1.21124	1.42332	0.976143	0.292759	0.103484
ENSG00000088035	2.08252	3.20796	5.14354	2.83509	2.0566	2.33971	12.8149	13.1545	9.93738	12.7959	5.13993	5.10868
ENSG00000142856	4.79204	3.72554	6.10491	0.717942	9.09309	4.13279	12.107	14.6711	9.85726	14.3845	5.37815	4.55582
ENSG00000203965	1.60503	0.819194	1.58841	0.845736	0.942796	0.38504	2.90424	3.27659	3.94081	2.99928	1.56045	2.17203
ENSG00000116652	1.16345	0.683293	0.198248	0.394499	0.553903	0.806355	1.11221	2.01332	0.968578	0.819247	2.55714	1.48851
ENSG00000079739	5.36457	5.94	9.59107	4.58058	7.2557	5.04277	15.3441	16.5007	9.83897	12.5242	3.97484	6.24822
ENSG00000185483	2.12886	3.49048	0.625879	0.17357	0.608501	1.20181	2.45029	0.894581	0.556214	1.13427	1.79506	2.16089
ENSG00000177414	0.0394556	0.0510536	0.0136242	0	0	0.0419057	0	0.0302761	0	0.0275407	0	0
ENSG00000158966	2.29831	1.8622	0.464676	0.499437	0.361867	0.96862	0.703988	0.791419	0.51028	0.439256	4.22886	3.17694
ENSG00000162437	2.90805	2.64391	6.65191	3.45411	2.37164	4.77086	8.57155	8.52933	6.70082	6.79433	6.19654	6.45157
ENSG00000162434	44.3549	64.1714	20.2645	10.4201	18.9189	7.09688	6.11025	19.3289	9.27171	14.3915	12.984	12.5135
ENSG00000162433	1.88801	3.12645	6.79482	5.81775	11.245	8.97786	1.26542	8.89008	4.46144	4.35598	7.64331	6.11569
ENSG00000116675	1.40234	2.07549	0.90303	1.08062	2.91926	0.515766	2.69502	2.86132	3.205	2.40347	0.54421	0.479285
ENSG00000116678	4.48383	3.06365	2.8928	1.84033	2.08216	1.10517	1.67693	1.98936	1.94759	1.06169	5.98041	5.72061
ENSG00000213625	28.1782	22.4324	18.8215	7.47527	8.18231	4.36047	22.7497	14.426	18.7766	14.6393	11.208	10.6563
ENSG00000184588	4.6452	3.62272	0.648509	0.0631046	0.470262	1.82525	30.47	36.7842	41.2233	28.0022	3.47916	3.39111
ENSG00000118473	4.19522	5.84383	0.275273	0.0326202	0.150297	0.143808	6.07827	3.09738	2.40477	3.61571	1.10115	0.670655
ENSG00000248458	8.28414	7.52164	8.58286	7.25727	9.77759	12.3988	9.13421	12.9599	3.38861	6.98926	19.2729	21.4467
ENSG00000152760	0.193322	0.25214	0.0623631	0	0	0	0.257452	0.198494	0.238775	0.289819	0.144371	0.26791
ENSG00000172410	0	0	0	0	0.0775958	0.395325	0	0	0	0	0	0.084417
ENSG00000152763	2.65654	2.61334	2.17707	1.93529	1.21373	0.748052	0.473739	0.504099	1.10805	0.513267	2.38867	1.20228
ENSG00000198160	19.1011	17.6759	14.5285	7.8212	12.6051	7.05644	8.97832	12.4827	11.5033	8.85165	8.59784	9.63394
ENSG00000116704	5.42433	5.28712	8.61281	3.31645	4.47711	2.62574	3.41762	4.62899	2.93057	4.59188	4.57225	4.33312
ENSG00000203963	0.0607424	0	0.0256085	0.0471787	0.0898906	0.355832	0.0413834	0.0873305	0.0332111	0.0605239	0.12536	0.107038
ENSG00000162594	0.0581558	0.0897492	0.0883791	0.0816259	0.0519581	0.172052	0.129013	0.158519	0.0288619	0.0722059	0.252943	0.2237
ENSG00000081985	0.13993	0.342178	3.13824	1.58012	6.39404	3.01903	6.89091	6.76326	8.69342	5.71966	0.487902	0.426976
ENSG00000142864	55.5208	60.9244	57.9681	33.3859	76.6827	64.216	72.7468	87.77	70.0361	83.2064	41.1471	45.5196
ENSG00000116717	6.0966	5.17291	83.9269	28.4912	95.943	37.6941	2.05208	3.29631	2.75903	3.32175	2.11106	2.34276
ENSG00000172380	74.8419	71.0988	78.6767	31.655	61.6475	38.9571	100.505	74.5434	66.7524	77.4144	24.6155	21.092
ENSG00000162595	1.20214	0.590946	0.0258694	0	0.0626834	0.0397968	0	0.595966	0.0593044	0.340143	0.881628	0.434593
ENSG00000116729	22.607	21.2901	17.823	6.3283	15.2702	18.8304	21.8865	29.5558	18.5878	17.7429	17.7746	13.1608
ENSG00000116745	0.0325271	0	0.173022	0.0489245	0.152907	0.327375	0.062007	0.0376108	0.0543157	0.119915	0.130899	0.121477
ENSG00000024526	0.988516	1.91709	0.518643	0.3841	8.31145	6.03997	8.55178	17.7266	11.1222	13.5808	1.22201	1.39716
ENSG00000033122	0.0209474	0.0250834	0.0454898	0.16195	0.334803	0.0267537	0.0834283	0.00783077	0.070494	0.0352626	1.04472	1.79641
ENSG00000066557	6.83229	7.57621	7.6344	4.17012	8.11344	5.47701	9.98069	10.4916	9.4056	9.17719	3.83274	5.29905
ENSG00000116754	38.1161	33.8861	46.2886	33.9412	39.2727	24.4946	46.3232	35.015	35.1009	32.0016	39.403	38.2001
ENSG00000118454	6.72276	6.4461	10.997	6.61197	5.41936	4.06348	9.43943	7.49189	8.03844	6.98085	3.41608	4.49458
ENSG00000197568	1.49013	1.75375	5.05345	2.82809	2.1622	3.78066	1.53771	1.22207	1.44837	0.986828	3.12047	1.28876
ENSG00000116761	1.06272	1.73858	8.77779	6.29783	37.8643	17.4033	5.38192	3.92384	5.63718	5.29515	0.772888	0.350578
ENSG00000050628	1.51171	0.453444	0.243046	0.274629	0.0948151	0.435638	0.323265	0.143604	0.108978	0.159954	4.87383	6.87337
ENSG00000132485	14.0532	14.5932	39.4899	14.3608	16.5446	11.9166	24.5811	20.9004	17.9363	18.4035	13.4705	16.2077
ENSG00000172260	10.84	7.30177	0.133855	0.0587407	0.116237	0.09598	0.538799	0.979869	1.97864	1.55855	3.11777	1.46618
ENSG00000162620	0.118108	0.50729	0.137005	0	0	0.426923	0.164506	0.284702	0.459293	1.0023	0.100686	0
ENSG00000254685	5.5425	4.22699	8.36411	5.59648	2.57509	3.97317	6.94079	7.88288	5.67424	6.74259	8.27514	6.63032
ENSG00000259030	0.531215	0.463062	0.391844	0.00939471	0.0604914	0.106737	0.289781	0.102795	0.965513	0.0938135	0.591358	0.527066
ENSG00000116783	0.365506	0.305124	0.259239	0.0737717	2.8616e-20	0.116429	0.103123	0.0228638	0.291416	0.0733792	0.707925	0.107003
ENSG00000162621	0.0217126	0.0092854	0.0104928	0	0.0753863	0.016195	0.011823	0.0125672	0.00792298	0	0.0726594	0
ENSG00000178965	0.00577943	0	0.0307035	0	0.0238132	0.0474389	0.0157312	0.00223218	0.0322646	0.0285156	0.0386031	0.0238909
ENSG00000116791	25.997	14.9741	5.72254	10.4122	10.684	4.52519	18.4463	13.097	31.6351	22.1742	13.5629	15.0922
ENSG00000162623	6.02386	6.62939	4.69754	2.12272	7.22727	4.60367	6.14108	7.98732	6.45621	7.24328	3.45251	3.3288
ENSG00000162624	0	0	0.0347493	0.0368177	0	0	0	0	0	0	0	0
ENSG00000137968	0.0527966	0.093382	0.0852414	1.34678	1.42609	1.96361	0.0569341	0.0469169	0.19013	0.0777159	3.62	2.66245
ENSG00000117054	13.5896	14.925	20.597	10.2451	19.1264	12.0852	29.2463	30.1659	24.492	25.6999	9.56877	8.58512
ENSG00000137955	18.0953	13.8735	43.1944	37.8691	60.0092	43.77	32.6116	38.928	30.398	37.1391	10.4508	11.8137
ENSG00000057468	0.00322281	0.0675104	0.0249253	0.0582333	0	0.0192272	0.0561618	0.0298318	0.0718231	0.0126886	0.0690787	0.064113
ENSG00000154007	0	0	0	0	0	0	0	0	0	0.0197819	0	0.152961
ENSG00000184005	0.478047	0.858474	0.168843	0.124238	0.401763	0.229636	12.5367	13.7995	8.5488	11.784	0.0994293	0.336779
ENSG00000117069	1.81033	0.781585	1.74736	0.577714	2.65836	1.53248	0.400756	0.062032	0.124028	0.124207	0.453446	0.28704
ENSG00000142892	15.6256	15.8846	8.26102	3.72811	10.4083	7.04183	28.0184	19.557	23.7534	18.2899	5.82556	5.24031
ENSG00000154027	12.1059	22.2943	0.415697	0.629055	0.251542	0.154697	9.67926	10.5453	3.27868	8.07942	1.18992	0.548101
ENSG00000036549	13.4302	15.6834	17.3591	8.86515	23.8351	18.0017	16.6359	16.2108	14.8858	14.9916	9.47527	9.37971
ENSG00000077254	24.8533	22.9294	19.6616	12.5116	17.2717	15.5331	28.1256	29.1599	22.9244	22.3982	25.6589	34.0178
ENSG00000180488	5.04979	3.74949	8.25234	3.81299	4.45491	2.14622	4.04306	5.50482	4.60718	4.67793	4.83605	4.74914
ENSG00000162614	7.4144	6.52136	0.870791	0.466139	1.37671	1.18865	0.885707	0.830742	0.804115	0.798211	1.77444	2.417
ENSG00000162613	28.8727	24.0373	40.8411	22.8495	42.5908	34.6294	31.5458	46.4405	35.5239	31.4941	20.082	11.2835
ENSG00000162616	8.70778	6.17062	9.05904	3.63761	5.63539	2.53212	6.61184	4.89543	6.62304	6.17985	5.89501	8.45522
ENSG00000137960	0.00121012	0.0214868	0.253611	0.0328201	0.0549336	0.0426479	0.018489	0.0275351	0.00232735	0.0335238	0.381961	0.610047
ENSG00000122420	15.1971	10.6775	0.0147351	0.179178	0.0453217	0.0419858	0.0314623	0.209074	0.598837	0.197351	1.88125	1.89571
ENSG00000137959	1.93274	1.97604	0.348491	0.191539	3.28766	0.436111	13.5628	51.0603	5.60217	7.56657	3.54207	4.28649
ENSG00000137965	4.34227	8.24052	1.8964	0.60774	1.74098	0.844574	18.624	53.9585	15.2046	11.3039	5.16309	8.27039
ENSG00000162618	1.91731	3.06338	0.0115115	0	0.119366	0.00888168	0.0389093	0.156312	0.113099	0.0351772	4.02104	3.61419
ENSG00000117114	8.72931	7.71439	22.2808	13.7249	2.92783	5.65259	0.195627	0.662275	2.3256	0.665105	10.2584	10.0973
ENSG00000137941	1.5204	1.08513	0.827696	0.364381	0.603231	0.148361	3.36273	2.89723	2.00539	2.4079	1.16745	1.22293
ENSG00000142875	10.6608	10.145	2.36599	2.3445	3.16949	1.47698	13.2892	10.7986	10.579	12.3207	4.16961	3.62537
ENSG00000203943	0.934053	1.21429	1.53268	1.97339	1.1157	1.18623	3.81977	1.58521	3.48904	2.58238	0.362169	0.581914
ENSG00000137976	0	0.0513462	0	0	0.0464623	0	0.163434	0.261253	0	0.0341383	0	0
ENSG00000117133	13.0891	11.2641	19.7728	15.1084	20.7402	13.9642	18.939	25.0591	21.4596	18.1342	5.89048	7.58807
ENSG00000174021	18.4745	22.0247	21.5846	9.29625	18.7109	11.2923	24.914	21.5181	15.3085	15.8387	5.7131	6.53817
ENSG00000117151	7.30023	5.66616	7.32673	5.91949	7.71057	1.72718	5.68798	4.62276	5.75665	4.00598	2.96642	3.29119
ENSG00000180869	0.103345	0.0782697	0.0375413	0.0334276	0.0381002	0.0241502	0.031379	0.0278748	0.0793075	0.042854	0.162347	0.0900096
ENSG00000117155	14.3009	12.4231	5.20885	4.21927	6.61618	8.06499	12.5732	12.3402	11.9128	10.1124	5.82152	6.00466
ENSG00000171517	1.41695	1.23259	6.46615	5.82349	5.79996	6.09647	0.560498	1.90084	4.08793	1.69148	2.50704	1.78996
ENSG00000153898	0.437751	0.327254	0.145619	0.11362	0.688696	0.411096	1.42485	2.67699	1.22253	2.27745	1.26383	0.971918
ENSG00000162643	0.639289	0.38304	0.938428	0.136087	0.585176	0.349226	1.86445	0.910356	1.5524	0.70744	0.497605	0.288222
ENSG00000055732	1.51581	1.45451	1.51496	0.597634	1.56002	0.826472	10.83	7.0728	9.58918	7.38953	2.61093	3.54133
ENSG00000097096	1.77203	2.10232	1.1162	0.95218	1.6127	1.09482	0.940144	0.656648	0.798301	0.68873	1.51829	0.746289
ENSG00000162642	7.53893	8.37567	6.33844	5.16063	6.45995	5.6538	6.90947	8.86264	7.5197	7.30766	5.43295	3.53164
ENSG00000142867	6.0263	8.66351	7.98171	4.18863	6.73753	4.3507	3.4495	4.38852	2.88644	4.8006	4.28324	3.71737
ENSG00000153904	21.64	50.679	0.757678	0.396069	0.630121	1.2923	0.743334	1.14866	0.692841	0.745216	2.06383	1.40228
ENSG00000142871	84.521	77.3425	8.92748	5.18348	21.7327	9.43522	2.89419	2.20727	3.03837	2.10586	15.3443	5.15656
ENSG00000117174	3.70507	3.86493	3.20191	2.433	5.04451	3.66932	2.74176	2.57256	2.42282	2.27731	3.69605	3.82263
ENSG00000171502	0.927255	1.01705	0.0820417	0.0582878	0.102308	0.275883	0.0771088	0.232997	0.148604	0.117505	0.162102	0.243637
ENSG00000122417	12.1387	11.3926	7.52186	6.80604	6.76145	6.62003	9.16362	9.04845	8.25869	9.23698	9.64686	12.6025
ENSG00000137975	1.62711	0.463319	14.7155	7.70339	29.7594	26.7611	0.215125	1.37609	16.9977	1.54664	48.5728	62.42
ENSG00000016490	0.0135237	0	0.0130751	0	0.0159005	0	0.0294597	0.0417225	0	0.0133081	0	0
ENSG00000016602	0.0218655	0.0171745	0.0412213	0.0395062	0.10411	0	0	0.108784	0.190032	0	8.12599	16.962
ENSG00000097033	39.1387	32.7807	30.7698	15.521	28.5218	17.8862	28.6852	30.3526	21.4832	26.3903	20.3051	19.8444
ENSG00000183291	97.0022	95.6947	65.5565	52.4539	88.9494	45.0893	76.7541	51.9311	79.3922	80.3813	28.1618	28.2685
ENSG00000153936	17.4134	11.6974	7.65957	3.35453	7.18342	5.46842	21.4246	21.7003	19.1535	17.5325	6.81367	5.70514
ENSG00000267561	1.72859	0.642124	0.0346066	0.0638036	2.50521e-08	6.41181e-12	0.383471	0.271801	0.273092	0.226215	0.252324	0.37672
ENSG00000143013	33.4228	27.8519	23.3183	11.127	25.4746	14.4132	10.6546	11.1535	11.1861	7.44747	15.3881	9.52163
ENSG00000065243	24.668	16.8648	30.3434	17.5672	18.303	11.8987	20.1401	18.472	16.801	15.4267	15.4685	18.6991
ENSG00000137947	19.6991	15.254	22.4534	7.86761	13.6669	10.1378	27.6062	26.2395	28.0604	25.5448	12.3555	7.70439
ENSG00000137944	13.0997	8.46987	9.5618	5.99084	14.0046	10.2899	17.5602	20.3134	16.3924	14.3915	7.0362	11.9156
ENSG00000213516	3.59464	3.81442	4.64875	2.24904	4.37164	3.62338	5.4499	8.76661	4.78888	5.50946	4.91829	4.63004
ENSG00000117226	9.69804	10.6638	2.38144	0.600539	1.31434	2.25679	7.62411	4.83279	3.2847	3.27764	4.71352	4.8958
ENSG00000117228	13.0375	13.3564	22.6423	3.68424	2.40477	1.31698	3.69893	12.3481	4.6191	5.68647	5.97331	4.68897
ENSG00000162645	9.70642	6.05528	1.35088	0.506436	0.426054	0.196176	1.08407	2.23792	6.19797	1.79673	20.3538	18.3107
ENSG00000213512	0.092493	0.0188837	0.0894662	0	0.0203777	0.0258563	0.0157438	0.142568	0.0193004	0.0681708	0.166795	0.352761
ENSG00000162654	0.587725	0.700801	0.340061	0.335364	0.300366	0.607821	0.524818	1.98922	0.372636	0.492961	3.23357	3.06167
ENSG00000154451	0.113976	0.219531	0.24289	0.235629	0.256129	0.214395	0.216681	0.318024	0.115069	0.133092	0.909244	0.731266
ENSG00000183347	0.130947	0.0511067	0.663845	0.14771	0.601822	0.895663	0.0732975	0.372416	0.392227	0.119821	14.9115	29.5316
ENSG00000197147	0.481676	0.699466	5.51807	1.98146	4.20071	2.04861	3.5483	4.61955	2.46292	3.33182	4.71178	3.73007
ENSG00000171488	2.09802	2.46875	1.33815	0.631479	3.84705	3.5603	4.00664	3.90229	3.37378	2.73212	2.21363	1.73016
ENSG00000171492	7.07183	7.4495	4.80106	4.19068	11.9009	10.6381	15.8928	14.6777	16.2841	15.035	3.69456	3.51425
ENSG00000162664	7.30196	7.29592	4.28918	4.46894	7.55362	6.45754	11.786	10.3365	8.98157	7.58571	6.92379	6.25311
ENSG00000143032	0	0.0283408	0.021032	0.0326294	0	0	0	0.0355603	0	0.0213229	0	0
ENSG00000122482	9.55886	7.63399	11.9396	4.99997	8.86351	5.34893	9.53335	8.94634	10.0845	9.59438	8.22579	7.54212
ENSG00000162669	0.0342463	0.446543	0.0225816	0	0.0786822	0.122486	0.191844	0.41307	0.241519	0.150667	0	0
ENSG00000097046	2.60449	2.41374	1.58669	1.36871	3.37969	5.5672	5.43252	7.65266	6.09848	7.21848	2.91629	0.867473
ENSG00000069702	22.023	26.0634	0.79943	0.328814	1.27558	0.618765	6.45292	8.98171	3.74232	6.20007	16.3324	11.6901
ENSG00000137948	0.93352	0.296027	0.562987	0.385417	0.373359	0.318759	0.531232	0.554267	0.292196	0.454143	0.808925	0.711585
ENSG00000172031	0.0305573	0.119085	0	0	0	0	0	0.0234891	0.0338815	0.0298879	0.0824493	0
ENSG00000189195	1.37715	0.971582	0.47357	0.658493	0.0519275	0.131604	0.119501	0.488881	0.731903	0.258301	0.779732	0.906792
ENSG00000069712	1.44483	0.873493	0.425073	0.276108	0.144017	0.255031	0.4127	0.169502	0.454306	0.291281	0.600219	0.526575
ENSG00000203910	0.0560478	0.0985792	0.0288059	0.0525759	0.00688701	0.0788643	0.0614183	0.135183	0.116924	0.0386127	0.227503	0.0557905
ENSG00000174842	4.73741	3.3377	3.29451	3.22223	5.47949	3.00716	4.08762	5.25642	3.45576	4.52085	3.46884	3.05401
ENSG00000122484	4.79342	3.09698	6.62716	3.7867	6.95112	3.99073	3.76614	4.10141	3.34616	3.55495	4.40628	4.59817
ENSG00000162676	0.0629701	0.0205839	0.0143268	0.0236819	0.0555077	0	0.098555	0.0571217	0.0525827	0.0154788	0	0
ENSG00000067208	8.31017	7.46648	7.59497	3.45818	5.07482	3.12699	9.64496	7.21064	6.2617	6.98185	5.46221	6.13103
ENSG00000122406	665.827	428.038	581.272	415.225	688.945	433.83	582.421	353.018	463.871	482.158	434.309	273.781
ENSG00000154511	8.14297	10.8525	6.54313	1.91088	1.2798	0.885698	9.30182	12.755	9.58182	9.84968	1.461	2.16212
ENSG00000143033	2.48991	3.82411	6.34888	2.98836	4.64664	4.01237	7.2081	9.7241	6.22664	7.41305	6.16376	5.15698
ENSG00000117500	23.9907	17.2803	60.0773	27.609	35.489	14.6109	22.4448	22.3633	18.9598	20.008	6.44409	4.82953
ENSG00000122483	1.92298	2.05325	2.58013	0.832492	2.63442	3.62284	1.6886	1.40055	1.926	2.44466	0.855937	1.3631
ENSG00000117505	22.505	22.0481	50.4553	23.5931	33.2607	19.6079	25.1127	22.607	24.0303	20.1322	11.9266	13.9662
ENSG00000137942	4.60727	5.22801	5.36681	2.57597	1.95715	1.90889	7.49619	5.7458	6.90962	8.16651	5.15328	4.2556
ENSG00000137936	4.54646	4.70349	11.7595	4.62475	13.1153	13.3041	5.27087	4.30871	3.45816	3.32339	0.835715	0.965406
ENSG00000067334	9.72106	12.1416	16.4096	10.6568	17.7422	15.0875	11.9127	9.51449	11.3714	9.6372	13.3604	8.27367
ENSG00000023909	5.03129	5.00629	4.9008	1.51145	2.46784	1.27728	6.1233	4.19314	3.22287	4.93878	2.01563	1.62148
ENSG00000198691	0.0858399	0.0177836	0.0245978	0.0213601	0	0	0.00616148	0.0673092	0.00631879	0.0223386	0.0828602	0.285401
ENSG00000137962	34.1419	18.5036	19.3058	12.7289	25.9513	17.5681	2.17276	3.24619	3.02984	2.81695	8.51036	12.1477
ENSG00000117528	10.8933	8.63194	16.5308	8.43828	9.73782	6.1038	20.5076	21.5369	18.6235	16.7503	14.5547	14.9245
ENSG00000117525	8.87337	5.16391	139.533	51.2782	230.97	105.358	0.859581	2.23461	8.05872	4.49063	2.25306	1.74703
ENSG00000143036	0.695935	0.371504	2.48516	1.18332	0.768517	0.513576	2.60776	0.79307	1.34975	2.58394	1.63116	1.93859
ENSG00000117519	127.574	116.643	21.7695	8.21612	18.524	20.3456	148.957	102.674	92.8351	111.507	19.7402	14.967
ENSG00000172339	7.01157	5.23508	8.46251	3.00516	4.76815	3.87867	12.3085	9.94505	8.27807	10.2066	2.06042	2.86555
ENSG00000152078	0.088473	0.799547	0.474596	0.678776	0.0681341	0.10069	4.2229	2.54065	1.89008	1.79256	0.316558	1.46212
ENSG00000271092	1.43903	0.590406	0.904665	0.0789641	0.786311	0.441832	1.25683e-05	1.60011	0.413182	1.19605	0.00425668	0.861802
ENSG00000122481	4.35753	4.62921	4.48254	3.29106	2.2296	2.42582	9.20947	6.61686	7.68207	8.03551	5.94118	3.26526
ENSG00000237435	0	0	0	0.216644	0	0.00721378	0.0105859	0.00464512	0.0321135	0	0.0659224	0
ENSG00000117569	5.78291	4.82984	2.00035	2.06074	2.54348	3.43164	3.89313	5.78391	5.19212	3.39796	3.89064	4.41067
ENSG00000188641	18.6204	19.6999	0.346951	0.81685	0.704526	0.764718	2.05054	4.42778	1.77049	3.61666	11.8225	7.58681
ENSG00000162627	19.6468	19.5751	3.4191	2.08534	7.90715	4.70917	18.1082	14.2813	11.7151	15.8949	3.90606	6.72547
ENSG00000117598	0.0256044	0.0223489	0.0781702	0.0578328	0.0677428	0	0.0697171	0.0493772	0.0535837	0.0346538	0.0541481	0.0230354
ENSG00000117600	1.55738	2.10807	0	0	0.348802	0.141106	0.298504	0.283355	1.53634	0.120705	1.92451	1.62472
ENSG00000099260	0.133014	0.0664123	0.107281	0.101891	0.0260285	0.126279	0.760904	0.264693	0.34494	0.133204	10.025	11.642
ENSG00000156869	4.75847	3.56905	8.61067	4.26999	3.11982	4.3875	2.69218	4.18385	3.69444	1.83425	11.1617	9.01617
ENSG00000162688	3.97674	2.95036	5.36564	2.39405	4.02434	3.01513	3.69148	3.4425	3.38923	3.44167	3.94253	5.42902
ENSG00000117620	10.2972	9.90703	26.8666	14.5891	14.0331	12.1833	6.95797	8.90768	7.72473	8.67344	10.6514	10.5136
ENSG00000156875	20.5595	16.6519	18.4661	8.55752	12.3877	7.24959	21.527	19.5452	19.1139	20.9989	10.1106	9.79107
ENSG00000156876	0.302287	0.565677	0.631281	0.40668	0.313314	0.943773	0.845826	1.27051	0.601849	1.06373	0.751439	0.811179
ENSG00000122435	4.50103	4.27046	6.02464	4.61549	8.24786	8.09041	2.77812	4.93402	2.99656	3.37492	7.98121	5.72224
ENSG00000122477	0.538413	1.02984	0.680867	0.850932	1.28106	0.422508	0.717206	0.488818	0.769359	0.443762	0.936047	1.22342
ENSG00000137992	3.88579	4.94986	6.95971	4.42895	6.60798	5.75348	5.47665	5.94957	8.21846	6.4944	7.12575	8.19504
ENSG00000137996	9.91944	12.6079	15.3653	10.1864	17.3842	10.8308	12.6919	17.4951	12.9576	15.3589	5.39808	5.23354
ENSG00000079335	0.82689	0.750671	0.231921	0.246663	0.183592	0.256359	0.998175	1.40158	0.521773	0.725258	1.83826	1.98877
ENSG00000181656	0	0.0709333	0	0	0.0141539	0.0179519	0	0.0205753	0	0.0118498	0	0.0353207
ENSG00000162692	0.206702	0.250709	0	0	0.0403894	0	0.018719	0.0528138	0.0191241	0	0.998942	1.24215
ENSG00000162694	17.9076	12.4103	1.21959	1.75189	2.48499	3.17686	29.8319	21.3696	21.9342	22.8023	2.02472	2.88565
ENSG00000162695	8.54405	6.69526	8.86428	5.55306	7.77486	4.2082	5.15023	5.97436	3.70859	4.03633	5.42725	6.74253
ENSG00000117543	9.31859	9.11651	6.09635	6.95869	11.4556	8.62273	10.4782	11.9429	14.4272	9.77256	5.01862	3.28869
ENSG00000269175	2.26706	2.13717	2.27077	1.36548	4.1257	3.07675	2.97479	4.2443	3.61908	2.86031	1.07487	1.08808
ENSG00000170989	1.4531	0.513285	0.140506	0.218685	1.3751	0.346717	0.0633104	0.0168077	0.145659	0.071471	2.16217	1.80778
ENSG00000118733	0.0453375	0.0508085	0.0312655	0	0.00760561	0.0523661	0.0655964	0.0116523	0	0.307865	0	0
ENSG00000060718	0.697646	1.21771	0.762817	0.0921633	0.865939	0.793301	17.0596	7.80687	6.95341	10.2351	0.166387	0.0178796
ENSG00000185946	4.36943	5.33932	9.28908	4.96591	3.90157	2.9072	4.30752	5.99489	2.71872	4.78004	14.2474	8.82977
ENSG00000240038	0.640212	0.548376	1.26382	0.95078	0.9174	0.780679	0.198705	0.43321	0.307043	0.209468	4.92196	4.53194
ENSG00000243480	0.237107	0.182425	0.157855	0.414644	0.131903	0.0775717	0	0.00409676	0.0596577	0.0104321	1.64443	1.27265
ENSG00000237763	0.257833	0.639474	0.700684	0.623162	0.319408	0.560068	0.254647	0.789201	0.190017	0.367867	1.45022	0.905694
ENSG00000174876	0.256243	0.634984	0.723819	0.620998	0.312345	0.558505	0.254359	0.822076	0.207943	0.367213	1.40837	0.897917
ENSG00000187733	0.0577674	0.065919	0.0735831	0.15987	0.0797655	0.0505315	0.00726448	0.0133318	0.0059189	0.0104456	0.818594	0.542698
ENSG00000198890	4.23379	3.86149	1.37302	1.51509	2.66759	2.86294	8.54787	7.14537	6.58638	6.92482	2.79285	3.02053
ENSG00000162631	3.74705	4.00991	0.223409	0.7441	0.423371	0.973075	0.331163	1.35886	1.45744	2.28807	0.649701	0.647166
ENSG00000134215	5.7236	1.83331	3.10391	3.89296	0.626581	3.43755	0.706814	1.51529	1.26009	0.816498	25.0586	28.8381
ENSG00000085491	22.0204	19.9089	11.9623	7.85648	11.0675	8.51646	20.7272	17.7369	16.9222	18.3793	5.44099	7.0572
ENSG00000196427	0.0263255	0.0167046	0.0423265	0.0218903	0.0251613	0.0276264	0.0296216	0.0739756	0.0395865	0.0333124	0.00991191	0.0292296
ENSG00000186086	0.0362874	0.0350268	0.0482241	0.0290095	0.0332633	0.034527	0.0361119	0.0824483	0.0424887	0.0309438	0.0207169	0.0327793
ENSG00000162636	4.81722	5.16934	0.825368	0.353983	0.55409	1.10571	15.5914	13.4255	13.9931	14.4966	3.7271	4.13855
ENSG00000162639	1.63153	1.56468	1.95393	0.303046	0.797578	1.09203	1.72426	1.74938	1.73813	1.44925	1.49845	1.56989
ENSG00000134186	8.02909	6.02524	13.3288	5.6598	10.8335	7.34394	8.45499	8.05851	7.40161	8.35656	6.97283	6.36591
ENSG00000143107	0.260643	0.169811	0.0252392	0.0622499	0.0765765	0.0154182	0.0852213	0.180548	0.20305	0.127938	0	0.195485
ENSG00000116266	13.9398	11.6877	17.0036	7.2537	9.9164	6.1557	11.3144	13.6612	10.9862	13.4241	13.4652	12.3131
ENSG00000162641	0.0552208	0.162274	0.0534551	0.0208061	0.341254	0.0864615	0.113431	0.170753	0.0769877	0.0476002	0.280665	0.182593
ENSG00000121940	7.94358	8.17319	9.6607	6.52786	7.4367	4.48395	9.74846	10.1729	7.83933	9.33266	5.15557	5.75999
ENSG00000121957	8.90451	4.68027	14.7599	14.4674	55.6723	33.67	15.5239	18.9361	23.4206	15.6911	12.8441	17.6615
ENSG00000085433	6.47687	5.16174	9.96798	3.1695	3.09432	1.73285	6.26568	6.23719	4.27051	4.74418	6.72762	8.63259
ENSG00000197780	34.1558	45.4223	79.3874	40.717	41.4474	19.953	30.0457	24.6184	28.6576	34.3703	8.37392	7.90562
ENSG00000215717	14.3451	11.5661	17.9538	6.19196	13.4415	5.09878	4.52096	5.54096	5.76198	6.02376	10.3864	7.75644
ENSG00000179902	0	0	0	0	0	0	0.516543	0.107588	0	0.0700957	0.130798	0
ENSG00000116299	0.106537	0.255848	0.0735887	0	0	0.113477	0.0165779	0.0117344	0.0508438	0.0501363	0.516406	0.0797484
ENSG00000031698	33.813	47.794	95.9753	63.0274	82.1298	50.1187	20.2382	30.365	36.2218	24.8819	12.4953	13.4823
ENSG00000143126	0.0390708	0.115201	1.39221	1.02387	0.242473	0.822822	0.674051	1.7973	0.718446	0.526359	4.02409	3.55228
ENSG00000134222	1.26645	2.46477	0.524973	1.65287	1.25952	3.04087	6.63742	8.81834	6.94027	6.43888	1.39086	0.791364
ENSG00000221986	0	0	0.342391	0.144202	0.150611	0.239152	0.0350176	0.024684	0	0.0314005	0	0
ENSG00000134243	4.2536	4.88503	7.48327	3.30733	2.23392	3.20789	57.3515	32.883	33.4895	34.1073	7.64414	9.80163
ENSG00000143106	49.9921	46.9966	63.6914	39.4546	73.8472	49.7697	78.1918	74.2732	75.9173	76.9417	19.1745	20.4977
ENSG00000143028	0.15055	0.121366	0.00559697	0	0.0910288	0.0192557	0.211782	0.0843716	0.116182	0.0637767	0.0310121	0.0234182
ENSG00000162650	0.184069	0.62504	0.480786	0.193668	0.345995	0.439054	0.260691	0.468044	0.409579	0.361638	0.185346	0.137593
ENSG00000174151	2.13611	1.54095	3.16667	1.61603	1.4904	1.18738	2.37267	2.48601	1.19244	1.18531	4.75254	3.24359
ENSG00000181754	0.192916	0.150844	0.257434	0.359513	0.0385049	0.0571911	0.0781304	0.0551231	0.0958354	0.0504075	0.750707	0.641062
ENSG00000156097	0.025391	0.0555136	0.057245	0.0255252	0.0497968	0.0905027	0.0184324	0.039206	0.0212462	0.0166877	0.124503	0.035021
ENSG00000065135	32.3742	33.7417	44.8195	27.0412	36.1923	19.8663	31.1366	32.5896	29.4445	29.9868	17.4744	22.6516
ENSG00000134183	0.727733	0.427948	0.271663	0.296018	0.502477	0.417377	0.197744	0.405415	0.475042	0.257829	0.356277	0.413061
ENSG00000116337	3.98759	3.0369	0.711871	0.661311	3.24022	1.64373	2.3739	4.56257	2.3974	1.33825	1.69396	0.864865
ENSG00000168765	5.57737	5.70331	2.13709	1.52581	3.10431	0.535325	13.2646	8.17656	9.23956	9.91006	4.46856	3.47335
ENSG00000213366	13.2877	9.71714	1.03498	1.57278	1.27289	1.12213	8.83451	5.99834	8.38643	7.42898	14.4405	9.64469
ENSG00000134184	8.37448	8.67547	0.803124	1.80936	1.38794	0.233093	1.41803	1.50275	9.45704	6.64351	4.24395	0.745841
ENSG00000134201	4.83364	3.51859	0.0950541	0.0560883	0.200157	0.0193089	0.514386	0.493825	1.13216	0.505578	3.71475	2.3087
ENSG00000134202	18.5504	8.66482	8.86575	5.38061	9.18358	0.417861	11.4517	2.69595	21.4692	7.53572	5.69566	5.71436
ENSG00000198758	0.0218249	0	0	0	0	0	0	0	0	0	0.0540446	0
ENSG00000184371	11.2964	11.526	0.228733	0.912833	0.1026	0.264103	1.09043	5.78024	1.59814	1.8847	5.53746	4.26387
ENSG00000168710	27.3772	23.7429	14.7192	8.2949	16.1162	12.2712	34.7026	50.1607	33.4884	32.6825	11.497	11.7765
ENSG00000143093	11.5759	9.95372	7.6467	2.95204	4.99702	5.07408	4.98347	8.26101	8.41803	6.27811	4.71973	4.14312
ENSG00000156150	0.607499	0.816938	0.269674	0.487783	0.599581	0.10379	0.303585	0.268082	0.335337	0.409814	0.624595	0.347701
ENSG00000186150	0	1.50862	0	0.130381	0	0	0.0158124	0	0.096552	0.00567877	0.0391183	0
ENSG00000197106	0.0131116	0.172718	0.0365438	0.0178383	0.216579	0.100812	0.102565	0.720082	0.998374	0.127566	0.413241	0.506586
ENSG00000116396	0.419762	0.521809	0.152156	0.172827	0.06757	0.0511562	0.0625442	0.251395	0.18698	0.0450313	0.700561	0.326731
ENSG00000162775	3.68033	3.7337	6.57335	3.37592	3.99801	5.10075	5.91846	6.97606	5.09629	5.06084	3.14606	2.56765
ENSG00000168679	5.46435	3.54349	0.261329	0.320773	0.364307	0.316249	10.4751	4.30891	6.37102	7.46929	2.11195	1.88904
ENSG00000134248	74.6764	50.2841	91.7948	42.6443	43.1451	21.6867	86.3198	80.8089	103.602	98.6144	23.1854	17.7542
ENSG00000143125	0	0	0	0	0	0	0	0	0	0.0161272	0	0
ENSG00000143105	0	0.0572863	0	0	0.0257911	0	0	0.0169137	0	0.0431016	0	0.0548039
ENSG00000177301	0.0731836	0.0568754	0.0425182	0.0989349	0.0257908	0.0327364	0.269419	0.231824	0.417035	0.693791	0.365559	0.381227
ENSG00000177272	1.89857	0.930197	0.0121548	0.00757373	0.00492845	0	0.0136939	0.0387972	0.0420348	0.0123771	0.319991	0.613522
ENSG00000143119	0.0932561	0.0755908	0.0904515	0.0871047	0.109652	0.208034	0.12677	0.143137	0.309091	0.0453471	2.28715	1.30917
ENSG00000121931	4.7068	4.25909	20.5264	3.8847	8.30531	3.43518	2.98061	6.30938	3.73262	5.82085	3.98	2.31703
ENSG00000156171	8.6665	7.12371	9.70601	6.40427	9.5414	4.81552	14.3346	7.88221	12.9402	10.1704	3.4674	4.10356
ENSG00000134255	10.4682	10.281	15.9008	8.59689	10.4441	7.97762	9.44443	9.31077	10.7671	8.93791	5.40682	6.95123
ENSG00000162777	1.52512	1.54294	3.38191	2.42603	3.37294	3.43326	0.563698	1.10414	1.42505	0.692114	3.36698	5.35435
ENSG00000064886	0.430495	0.548368	0.46436	0.0949432	0.306239	0.17897	0.405419	0.561514	1.44214	0.624634	0.306815	0.230938
ENSG00000134216	0.0250436	0.0601449	0	0	0	0.0399407	0	0	0.0203041	0	0.108274	0.0471302
ENSG00000173947	0.380277	0.65485	2.45542	0.315879	0.148316	0.0240869	0.506632	0.29204	0.557271	0.521139	0.195019	0.160139
ENSG00000085465	0.627926	0.796001	0.720182	1.47334	0.770912	0.925721	0.256302	0.334107	0.627516	0.673452	1.71364	1.68594
ENSG00000116455	7.73934	7.86292	8.4777	7.86032	11.4446	14.1286	9.17109	19.9277	12.1366	13.0263	6.47037	4.69105
ENSG00000116459	67.0255	61.0046	61.2495	43.8981	67.3424	76.5057	102.297	98.6297	119.464	106.876	39.0469	47.3182
ENSG00000143110	0.0111526	0.16463	0.243626	0.0949094	0.0586542	0.120806	0.0547144	0.0384286	0.0553406	0	0.71482	0.379679
ENSG00000121933	0.0991708	0	0.0110783	0	0.0806183	0	0.380528	0.562868	0.0639617	0.0224506	0.52998	0.171391
ENSG00000116473	27.2595	31.3916	42.5861	20.7906	24.5013	14.083	18.9864	28.7788	22.5922	23.3339	14.3421	11.4418
ENSG00000197852	0.398483	0.637137	1.0809	1.02608	0.745852	0.533911	0.799954	0.495249	0.762604	0.396385	1.73722	1.49538
ENSG00000064703	4.3063	3.25195	5.00358	2.64408	4.21913	4.03013	10.3681	9.24553	5.63381	5.59757	2.41644	2.26541
ENSG00000171385	0.784499	2.29109	0.0591441	0.0336058	0.0644125	0.0833849	0.0554562	0.117157	0.105597	0.0920221	1.55626	1.79251
ENSG00000143079	9.89083	8.39848	13.3964	5.80869	4.44063	5.38183	5.29086	4.99345	4.23461	4.1172	6.29156	6.54729
ENSG00000134245	0.208741	0.363183	0.564057	0.503449	0.263481	0.331766	0.201771	0.198267	0.315518	0.112716	2.17931	1.64867
ENSG00000007341	5.4795	3.83995	3.22084	2.01426	4.34845	4.87222	5.65491	6.06226	4.23149	4.48054	4.01039	4.83503
ENSG00000116489	57.8626	48.522	66.8298	33.6237	63.0834	38.319	54.6917	59.7377	50.4297	48.5499	19.813	23.7581
ENSG00000155363	2.04256	2.0222	3.37791	1.76365	1.92953	2.80528	3.36319	8.48868	3.05648	2.13712	4.00789	3.58634
ENSG00000155366	103.916	93.307	55.7423	33.2544	79.6787	66.5916	48.8775	50.676	78.8167	55.5425	12.6394	8.4259
ENSG00000271810	0.691474	0.123129	0.0969807	0.259848	0.142339	0.158628	0.118479	0.0151949	0.455763	0.136948	0.651273	0.182359
ENSG00000155367	0.249068	0.0263738	0.892478	0.799663	0.179507	0.0108315	0.0464496	0.115809	0.143893	0	0.177216	0.380448
ENSG00000184599	0.128296	0.313819	0	0	0	0	0.139934	0.229562	0	0.083295	0.0467162	0.0970841
ENSG00000155380	13.7034	11.4905	22.2021	15.9818	38.2675	24.8008	26.1105	18.1225	24.0815	19.6936	4.79953	3.49
ENSG00000198799	3.14535	2.22026	3.97613	1.63466	2.78479	2.22651	3.01626	3.61984	2.25957	2.56066	5.27366	3.81201
ENSG00000081026	1.45997	1.87111	1.76954	1.10046	1.12384	1.00277	1.31188	1.94792	1.15199	1.04418	2.68232	2.50437
ENSG00000116793	9.12535	5.04878	1.08447	1.27201	0.953501	0.998343	5.69109	5.98183	6.97183	6.56468	0.229533	0.692932
ENSG00000081019	2.8205	2.45268	3.05079	1.4905	2.50278	1.59969	1.89449	2.55166	2.41664	2.22044	4.67011	4.0279
ENSG00000134242	0.0482028	0.0264038	0.0291735	0.0906132	0.0237632	0	0.0525439	0.0425883	0.240606	0.0346713	0.463102	0.452196
ENSG00000188761	0.00669346	0.287264	0.128527	0.0619808	0	0.948517	0.161423	0.754928	0	0.121431	0.135258	0.78561
ENSG00000134262	2.69585	3.37001	1.73816	1.15899	3.52055	3.00096	2.83436	4.36219	2.08715	3.81757	3.44818	3.81854
ENSG00000118655	0.823606	1.21169	0.426247	0.272234	0.750048	1.58534	1.50067	3.02897	1.69445	1.84928	0.886621	0.924165
ENSG00000163349	7.58537	8.33776	11.3303	3.89567	5.78936	3.57378	8.13244	10.5496	10.2058	7.15622	11.7981	10.5986
ENSG00000116774	52.2533	31.0015	0.0235339	0.357622	0.124393	0.157949	0.821237	0.561291	1.71472	0.524291	3.23874	3.58149
ENSG00000134207	0	0.0125295	0.0184694	0.0288098	0.0749542	0.0142567	0.0208128	0.0405698	0.0106581	0.0517955	0.0255699	0.0593369
ENSG00000197323	3.66038	3.73719	10.4925	5.08051	4.73541	4.67168	3.10956	9.42069	3.30859	4.19675	9.23399	6.94353
ENSG00000116752	13.0588	11.2278	27.8029	15.0863	22.0884	13.8181	16.758	20.0712	18.9261	19.1767	10.92	7.49504
ENSG00000175984	0.830237	1.0628	24.4537	9.47558	4.29637	4.27978	0.33735	0.982666	0.996843	0.868192	8.81485	10.2092
ENSG00000116748	0	0	0.0607551	0.0539502	0.042165	0.0267499	0	0.0414842	0.0299491	0.0264445	0.0361295	0.0111735
ENSG00000213281	23.8002	22.3789	31.4358	13.6473	17.2506	11.0947	29.4906	28.6145	23.6032	24.4757	6.94594	8.03508
ENSG00000009307	243.508	241.498	318.54	135.483	241.694	170.074	142.373	170.564	143.158	186.929	147.446	159.88
ENSG00000052723	7.50205	7.59151	12.4649	5.43166	7.94428	4.03599	5.0842	5.47799	4.02228	6.21445	6.40475	6.94974
ENSG00000198765	0.0499006	0.0217429	0	0.0250179	0.0286361	0	0.0265201	0.0256447	0.0135691	0.0163516	0	0
ENSG00000134200	0.219468	0	0	0	0	0	0	0	0	0.0822461	0	0
ENSG00000134198	7.51544	12.357	0.166413	0	0.274862	0.18794	0.0978534	0.219547	0.13301	0.0391625	2.37746	1.68353
ENSG00000134259	2.79185	4.6849	0.125675	0.193124	2.12167	1.0276	0	0.0993133	0.190804	0.0210192	0.526852	0
ENSG00000173218	1.82522	2.18882	1.52824	0.689666	1.40708	2.06823	5.62372	6.52428	3.77637	4.1567	2.26337	3.31197
ENSG00000118729	0.0563142	0.0544172	0.0389543	0	0.00671481	0.0122459	1.89843	0.419672	0.507629	0.876085	2.1252	2.48099
ENSG00000177551	0.157439	0.0150388	0.251185	0.191438	0.539523	0.106802	0.0591067	0.0548166	0.0188289	0.00564959	0.045517	0.200559
ENSG00000163393	2.35686	3.74813	10.1668	7.75712	11.8628	8.05975	1.43197	1.2712	1.09799	1.39154	1.86354	2.47813
ENSG00000173212	1.41047	1.59577	1.96049	1.31685	1.67434	2.68829	1.25232	1.78085	0.711681	0.942957	6.20133	5.39709
ENSG00000163399	57.9442	70.6931	51.8968	29.014	70.6745	55.7679	466.166	441.355	387.881	352.45	53.3559	54.0444
ENSG00000269279	7.99748	18.3228	8.04986	9.14009	6.43637	6.50884	59.1283	55.9143	65.4559	49.3331	2.67305	1.79461
ENSG00000116815	5.90426	3.33387	6.83248	7.72433	6.07065	3.68589	13.4618	19.5228	13.9571	12.7844	8.61188	9.50514
ENSG00000143061	0.556361	1.02048	7.5208	3.4093	3.48193	3.01322	6.34704	10.4777	9.3534	9.15857	5.8267	6.24151
ENSG00000203864	0	0	0	0	0	0	0	0	0.231731	0	0	0
ENSG00000116824	0	0	0.0524281	0	0.0952679	0.16088	0	0.0312328	0.237251	0	1.12449	0.987841
ENSG00000134247	6.10085	8.89384	8.80974	5.24625	7.26418	8.24408	8.9793	9.61503	8.79603	10.7769	6.00576	6.14836
ENSG00000134256	0.0506364	0.0331507	0.207146	0.266883	0.0595442	0.229584	0.0515778	0.0537094	0.0439891	0.0408028	0.271315	0.361982
ENSG00000116830	2.96642	2.79518	4.77669	1.79916	5.14397	5.25898	5.9659	8.34531	5.05869	5.3035	1.96903	2.30104
ENSG00000134253	0.3325	0.264916	0.561955	0.232052	0.272389	0.528215	0.337486	0.93464	0.576113	0.347083	1.36612	0.700924
ENSG00000134258	0	0.00716928	0.0477411	0.0742408	0	0.00817778	0.00448093	0.0729768	0.0183161	0.0298793	0.154514	0.0235858
ENSG00000198162	11.0348	9.09207	7.04375	4.49836	4.31257	3.82419	5.05451	7.85819	4.81181	6.73044	7.5425	11.2136
ENSG00000183508	3.79806	1.36603	0.189248	0.349895	0.24858	0.168267	0.170595	0.182507	0.342136	0.126655	0.46891	0.777298
ENSG00000196505	5.83382	5.2457	9.3431	5.55049	6.17382	5.13263	7.81901	7.7252	7.65604	7.05017	5.2348	5.42704
ENSG00000065183	7.11695	7.90511	6.08161	4.25739	18.699	11.8514	15.7553	16.5431	13.3935	16.3351	3.65679	4.67357
ENSG00000155761	0.0498706	0.175475	0.140491	0.0429226	0.141188	0.236609	0.246135	0.284134	0.173524	0.0741188	1.872	1.2663
ENSG00000092607	1.77591	5.84588	0.00685588	0.0253084	0.0576799	0.0249995	0.0283876	0.17358	0.0352586	0.0255775	1.54333	0.508451
ENSG00000116874	3.506	3.7524	3.3969	2.22341	3.02832	2.16381	3.15413	4.03777	2.69546	2.62989	2.55592	2.49576
ENSG00000116882	0	0.353956	0.0300568	0.0464382	0	0.0461973	0.0507256	0.0801652	0	0	0.0949364	0
ENSG00000203859	0.132704	0.170551	0	0.0364057	0	0	0.0722344	0.203296	0.0138188	0.257335	0	0
ENSG00000203857	0.0305801	0.0794485	0	0.0228915	0.187438	0.0455409	0.174788	0.124456	0.0169531	0.367672	0.0412557	0.325114
ENSG00000143067	3.1174	2.97933	1.63369	1.044	3.33317	0.902474	5.93878	7.8324	3.60968	5.48616	1.20731	0.504313
ENSG00000092621	3.21731	7.00927	6.84526	7.40442	16.6617	22.3022	9.60876	17.0637	27.8395	10.7924	10.4331	9.8888
ENSG00000134240	0	0	0.00848142	0.0167945	0	0	0.00955195	0.0337866	0	0	0.481421	0.262088
ENSG00000134193	0.0608027	0	0.0829941	0.0183704	0.108416	0.0508409	0.0019972	0.102542	0.138506	0.0330169	0.0307651	0.0763469
ENSG00000134249	0	0	0.0275699	0.0429152	0.00838014	0	0	0.00549712	0.00794001	0	0.0191092	0
ENSG00000134250	11.8921	15.0283	23.9575	8.6897	8.79764	8.96618	5.66841	9.48691	5.02469	6.61673	24.6449	25.311
ENSG00000188610	0.392785	0.279794	0.0972861	0.34186	1.57152	2.35841	1.01461	2.64034	1.52096	1.95099	0.761029	0.470172
ENSG00000198019	0.0218021	0	0.0850774	0	0	0	0.0238307	0.0110697	0	0	0.0734111	0
ENSG00000236334	12.6943	10.1643	9.84943	7.55266	12.6098	7.4957	12.9946	9.62541	13.0294	12.4853	3.92181	6.81396
ENSG00000215784	0.317955	0.213485	0.0809462	0.249818	0.896834	1.78617	0.842023	1.78043	0.938844	1.10239	0.30523	0.256724
ENSG00000162825	5.3367	5.1493	7.51765	4.17416	5.17132	5.44986	2.47454	3.60393	2.1705	2.21072	6.24406	5.91631
ENSG00000231360	0.987386	0.615471	0.387256	0.710302	0.807241	1.1252	1.00089	0.762658	1.07969	0.569596	0.635882	0.255203
ENSG00000255854	5.8413	4.87834	4.02142	3.56413	6.17048	4.57781	5.75371	5.42263	7.84419	6.73714	1.12666	2.07357
ENSG00000168614	7.61975	6.91914	6.08292	4.45207	5.10199	4.64631	3.99646	4.11694	3.46632	3.52557	5.7208	6.06948
ENSG00000178104	137.346	160.524	7.65396	6.37265	10.9106	8.51975	26.5852	24.7251	31.4629	11.7806	13.4146	10.2187
ENSG00000268172	0.728085	0.195079	0.16285	0.133179	0.386098	0.0643006	0.183556	0.433095	0.0725381	0.139176	0.108155	0.396335
ENSG00000213240	16.4145	18.3525	36.315	12.6724	19.2298	14.8296	9.61841	9.96357	7.05553	7.16	27.4257	25.0737
ENSG00000163386	13.0339	12.842	18.0228	9.44169	9.80237	10.3118	5.69798	6.40933	4.91188	4.89622	13.5377	14.8172
ENSG00000168509	0	0	0	0	0	0	0.0171381	0.0388661	0.070703	0.0198043	0	0
ENSG00000117289	57.093	51.9913	76.0226	19.1118	142.444	46.4654	12.2546	18.4063	19.073	9.54651	130.273	80.7471
ENSG00000121851	10.5222	4.31257	5.3408	1.9502	3.5125	2.45742	6.84272	5.75377	6.99636	5.07764	3.25483	2.63462
ENSG00000181039	0.28478	0.0812087	0.074591	0.000921561	0.0432555	0.07051	0.0506364	0.0707801	0.107973	0.106673	0.0175801	0.0449417
ENSG00000152022	8.01315	8.32206	1.22844	0.859665	2.05941	0.973633	5.45263	6.74581	4.8186	5.89104	3.25926	2.01464
ENSG00000131795	24.1411	26.5389	17.8984	15.0174	27.8355	22.2149	21.6594	26.4944	20.9155	30.0076	18.165	16.1866
ENSG00000131779	7.54593	9.38141	9.72057	3.61999	8.37918	5.17092	8.86964	6.47519	11.2098	7.98859	5.23983	5.12081
ENSG00000143127	0.373277	0.456589	0.144313	0.103105	0.0510918	0.204194	0.0270824	0.0548541	0.136526	0.129135	0.226905	0.107763
ENSG00000198483	0.251776	0.395613	1.64121	1.02371	0.0740189	0.131437	0.0411326	0.00971124	0.126259	0.148708	5.5162	4.33968
ENSG00000131788	2.04014	2.18585	5.35632	1.59251	1.41954	1.62715	1.1368	2.19264	1.73019	1.48075	4.62052	3.88888
ENSG00000186364	0.714113	1.00532	1.81594	1.38134	0.4187	0.310204	1.11896	1.47215	0.800555	0.786002	1.32426	1.7123
ENSG00000186141	12.9207	13.6212	7.72396	6.65517	18.7949	9.01689	8.61135	11.7193	9.57667	9.59518	5.77281	4.04612
ENSG00000121848	13.1597	10.2401	4.1787	2.70037	5.95828	3.09236	6.56234	7.17379	6.85202	5.79914	3.07419	3.52683
ENSG00000117281	0.496723	0.428454	0.200213	0.0194106	0.178041	0.227359	0.237034	0.244609	0.133406	0.322713	0.44419	0.404482
ENSG00000174827	0.462573	0.384891	0.124468	0.0634776	0.693554	0.250886	0.272819	0.2272	0.0528656	0.346309	0.71943	0.316257
ENSG00000117262	3.13669	3.31768	5.89731	3.37878	6.2376	3.13722	5.55767	4.56453	4.54801	4.93885	2.31548	3.29579
ENSG00000196644	2.13041	1.92335	4.05648	2.05009	3.52023	2.0632	3.50475	3.07037	2.99771	3.17129	1.94222	1.9385
ENSG00000152042	6.90256	6.44567	7.44568	4.73879	5.36885	5.02343	3.78666	4.20337	3.00346	3.31949	6.86046	7.13547
ENSG00000186275	8.4327	11.1432	8.26806	8.40409	6.61604	4.9745	2.96154	4.77583	3.09216	5.23405	9.03488	10.7062
ENSG00000131791	4.70806	3.85494	12.8525	5.10627	13.7301	6.97877	5.37922	3.73986	3.26887	2.24134	4.83023	5.02672
ENSG00000131781	0.588976	0.59886	0.212864	0.141289	0.239226	0.159758	0.530795	0.739523	0.319491	1.12533	6.79222	4.74225
ENSG00000131778	13.6317	11.6954	12.7446	7.22441	18.6794	11.2139	27.8589	19.987	18.3032	19.1729	6.14892	5.25981
ENSG00000116128	0.713221	0.390162	0.414665	0.179356	0.310933	0.300577	0.56445	1.5546	0.640111	0.635191	1.45611	1.05679
ENSG00000162836	0.871041	1.0477	1.74273	1.45191	2.37119	2.87454	3.19025	4.50225	3.68271	3.25269	2.95979	3.18799
ENSG00000143140	0.00221073	0.0190996	0.282127	0	0.386889	1.00356	0.0216682	0.026217	0.00725508	0.0585794	0.423432	0.347087
ENSG00000121634	0.0169973	0	0	0	0	0	0	0	0	0	0	0.0212972
ENSG00000188092	3.63184	3.21607	5.80078	5.10347	6.08063	3.72686	5.45832	4.40031	5.14806	5.49774	2.80884	3.75186
ENSG00000203836	3.03023	3.08297	3.00972	2.16821	2.54605	2.2601	1.67853	1.91322	1.57782	1.40499	2.94901	2.61207
ENSG00000269647	0.0113395	0.266901	0.0335859	0.0745766	0.0262355	0.13573	0.435696	0.107639	0.00819139	0.268616	0.0508388	0.101048
ENSG00000255963	5.8109	4.72507	4.26052	3.54726	5.66508	4.77341	5.65326	5.47736	7.62674	6.62169	1.30432	2.09441
ENSG00000122497	5.88434	5.78392	7.43835	5.37783	5.14229	3.85301	2.5144	2.6023	2.60019	2.43118	5.64429	7.16701
ENSG00000256374	5.75332	3.82341	3.11907	2.95956	4.93325	4.34936	4.84121	5.36125	6.94923	5.72152	1.04974	1.63158
ENSG00000203832	5.68688	4.35191	6.52178	3.26882	4.63077	4.03016	2.64577	3.48769	2.67383	2.09293	4.2919	3.64379
ENSG00000243452	5.95259	4.75913	4.92233	3.11398	4.36117	3.3217	3.84758	4.56332	2.98217	3.36569	4.28025	3.99624
ENSG00000203827	4.61305	4.09613	4.6415	2.559	3.52989	3.08407	3.00438	3.0611	2.19517	2.44921	3.85664	3.85067
ENSG00000203817	0.245216	0.261489	0.0618138	0.320644	1.02436	1.26183	0.820214	1.86688	1.08052	1.29969	0.391524	0.385709
ENSG00000198161	5.97678	4.54875	4.13545	3.49539	6.21877	4.61472	5.72629	5.42657	7.82505	6.43324	1.22818	2.05225
ENSG00000203815	0.154	0.0980181	0.0750246	0	0.179208	0.114217	0.252372	0.117307	0	0	0	0.19605
ENSG00000150337	0.0294304	0	0.141272	0	0	0	0.0053466	0.0151216	0	0	0.11206	0.0489326
ENSG00000203814	3.75122	6.36357	6.0963	8.20521	19.6626	39.2195	13.0538	44.7076	16.9682	18.6292	10.7195	9.28543
ENSG00000183598	22.6931	13.8541	15.2079	10.3583	40.3858	132.377	158.742	261.241	182.378	112.476	13.3774	14.9381
ENSG00000183941	5.13852	7.448	4.94649	9.05824	21.015	45.4866	36.1328	62.7473	52.5285	45.053	4.09525	3.88864
ENSG00000203811	1.6852	3.36574	0.700674	2.41911	8.01428	24.022	16.1846	28.4555	17.1379	14.3389	1.83459	1.58161
ENSG00000183558	5.55569	8.71256	3.40757	8.19434	27.7148	39.6589	21.5639	33.0363	23.8594	26.5167	5.98062	3.96189
ENSG00000203812	10.4007	14.7763	6.64169	15.3099	51.9666	74.4672	40.9093	61.863	43.0562	49.7691	9.85318	6.09189
ENSG00000203852	1.70708	3.50581	0.802348	2.4683	7.97988	23.8002	16.2282	28.7621	17.1629	14.3385	1.44865	1.45042
ENSG00000182217	5.21569	6.96055	5.07231	9.39546	20.9371	46.1376	36.0271	62.5107	52.7133	45.1688	4.10101	3.89202
ENSG00000184678	2.07602	2.32015	2.55639	3.56924	4.17404	7.57442	3.94884	9.95795	4.76186	4.24892	3.727	5.589
ENSG00000184260	54.495	56.0603	62.4238	48.4406	105.312	127.626	136.3	198.761	141.218	128.787	51.4408	49.1447
ENSG00000184270	16.0851	18.4805	13.199	14.6118	38.4514	76.1255	62.966	110.906	77.809	56.982	35.9503	15.8889
ENSG00000178096	3.69671	2.23686	5.38507	4.21759	4.76815	6.02877	4.77862	5.21569	8.34348	4.9307	2.05544	4.07616
ENSG00000159164	6.26552	6.10772	0.162361	0.0612988	0.174892	0.111278	1.16922	2.18836	3.11858	1.84408	0.301091	0.318474
ENSG00000143368	2.04547	4.41623	13.7701	6.36754	8.06663	6.15115	2.09051	11.3731	2.78013	4.69566	2.39929	5.43404
ENSG00000014914	5.79541	3.30534	0.597406	0.713946	1.54925	1.1091	0.316986	0.881637	0.841223	0.475149	2.51423	3.42828
ENSG00000163113	2.94351	2.7477	4.19337	2.86594	3.37981	1.9268	8.33762	14.3024	7.50203	8.51789	2.68089	1.93492
ENSG00000136631	13.4036	11.0187	17.7873	8.78304	11.1568	6.47468	18.2684	14.3753	17.9655	13.0856	9.21743	8.53603
ENSG00000023902	24.1921	23.1354	2.90278	3.51575	1.69061	2.2509	8.31111	9.65205	12.6164	11.537	1.78298	1.34674
ENSG00000143401	8.76228	8.6658	5.58256	2.86241	7.83519	9.34686	15.2407	28.7133	17.3808	27.4967	9.74116	7.47662
ENSG00000118298	0.472374	1.3664	2.88733	2.03415	3.92184	1.35694	70.5287	35.8066	44.4702	49.5414	0.577042	0.643794
ENSG00000117362	23.9683	19.8721	18.1039	12.0144	17.4014	16.6884	24.9091	21.1119	24.2083	23.8411	13.9051	13.5847
ENSG00000118292	5.7914	5.69235	1.06701	0.318436	0.935914	0.781302	1.54851	1.62989	1.14009	1.248	1.97784	3.36674
ENSG00000159208	1.13639	1.37291	6.57757	2.80849	2.4842	2.09871	1.53186	1.0329	1.14889	1.17905	5.70001	5.98352
ENSG00000187145	21.565	22.9689	23.5448	15.4144	17.6101	13.5109	26.8736	21.0903	25.0975	30.8865	8.30731	9.77564
ENSG00000117360	7.6004	6.4071	5.36653	4.31341	4.7786	6.20465	5.71266	9.99354	7.07719	6.2629	11.274	5.69263
ENSG00000163125	2.52863	2.3448	5.59366	2.21064	3.55566	3.18214	1.59095	5.07145	1.9661	2.59435	4.75359	5.98852
ENSG00000143374	2.45586	2.77919	5.67329	2.82798	3.28653	3.64616	3.78919	7.072	6.38438	4.78893	1.72573	1.21785
ENSG00000143369	6.2632	13.0645	7.00462	3.7292	2.48548	5.54815	10.4117	36.0664	9.04932	12.7142	3.38418	5.42673
ENSG00000143382	0.936422	0.340387	0.941249	0.32328	0.500369	0.507148	0.120192	0.274441	0.372366	0.105618	1.16089	0.839248
ENSG00000225996	0.371231	0.295142	0.265719	0.0823696	0.332816	0.464659	0.171319	0.162933	0.0954537	0.131187	0.596017	0.251323
ENSG00000203804	0.21041	0	0.308582	0.153798	0	0.155669	0.115092	0.1594	0.0571276	0	1.02396	0.135343
ENSG00000143384	39.3994	39.1699	89.9332	45.2634	50.1934	46.1316	24.08	37.7668	24.6469	27.5195	60.2068	40.1033
ENSG00000143420	29.2723	22.3074	36.8734	23.1017	31.2346	25.788	35.6489	32.2484	38.1375	37.9602	23.8317	29.4136
ENSG00000143457	13.7778	12.2408	23.7158	13.7109	17.0936	8.974	8.65013	10.2486	10.4486	9.81216	9.58938	6.50973
ENSG00000143452	0.447439	0	0	0	0	0	0	0.0987007	0	0	0	0
ENSG00000163131	6.00212	5.68482	0.153391	0.667341	1.25112	0.495198	2.5085	8.18367	2.7207	0.338226	4.57538	4.4991
ENSG00000143387	983.613	795.067	7.61379	3.84715	12.6139	4.79542	209.267	267.238	98.9302	170.753	12.0292	12.9547
ENSG00000143437	12.1976	11.0449	9.19255	5.05551	4.89463	3.87999	7.61377	8.90882	6.06334	5.7682	10.3928	8.27097
ENSG00000143379	4.56666	6.44313	6.11082	3.64997	5.23929	4.46742	5.76084	8.6894	7.34988	8.36857	7.7037	7.80965
ENSG00000143418	20.9869	28.7334	12.2878	10.3583	25.1811	16.1056	21.8045	33.255	25.512	34.0252	6.15298	4.46178
ENSG00000143412	0.165627	0.308302	1.51169	0.248525	0.444376	0.987216	0.386755	0.40068	0.473143	0.463993	6.74866	8.93422
ENSG00000143409	1.81515	1.43551	2.81278	2.09365	0.966939	1.07429	5.45487	2.69639	5.94713	2.74941	7.11342	5.72711
ENSG00000143363	2.21061	2.55982	3.19314	0.783961	1.20149	0.630672	3.1436	4.1585	3.97621	3.6793	2.49077	1.87103
ENSG00000163141	0.397998	0.261707	19.1887	6.82607	2.67701	2.7639	0.286941	0.247844	0.837029	0.531578	18.431	20.3649
ENSG00000143443	0.125297	0.188628	0.933618	0.470398	0.439047	0.124505	0.224277	0.71423	0.527679	0.54441	0.71619	0.748143
ENSG00000213190	0.749987	1.27258	1.48274	0.216762	0.586162	1.02689	2.56211	2.45139	3.99258	3.2238	0.481214	0.79548
ENSG00000197622	15.2582	11.3136	60.772	25.3291	29.9236	20.7486	24.95	26.3805	23.8592	21.8578	15.8509	17.7756
ENSG00000143458	2.78727	2.86993	2.89322	3.41692	4.23336	1.90837	1.53624	1.50136	1.44705	0.925652	3.66323	3.25473
ENSG00000143434	0.156098	0.164451	0.265312	0.0683687	0.0867376	0.0646389	0.0988401	0.120434	0.0408385	0.0640375	0.440555	0.436566
ENSG00000163154	0.037915	0.0490935	0.110299	0.0566305	0.0222009	0	0.165379	0.0291028	0.0629298	0.0739751	0.718222	0.380598
ENSG00000163156	3.59733	4.84364	7.58831	5.59771	5.62189	5.4327	3.09824	7.63438	5.14569	5.74736	2.1524	3.76021
ENSG00000163155	2.04435	1.18996	1.56161	1.82617	0.767237	0.942222	3.43475	2.83656	3.79519	3.84293	1.41906	1.01147
ENSG00000163157	0	0.300942	0	0.610624	0.20707	0.154485	0.262933	0.328264	0.0775572	0.200104	0.482085	0.311616
ENSG00000163159	11.3362	8.80841	13.2317	5.76552	11.1375	7.08401	10.7056	9.94063	12.5344	10.4911	3.81551	3.67922
ENSG00000143398	20.4174	19.6557	47.039	15.7331	34.9377	20.1486	19.2139	20.8111	16.809	17.289	5.80728	7.57656
ENSG00000159352	40.5637	31.2422	29.3881	29.9142	44.1263	33.2458	37.7144	38.9375	51.1032	41.7543	22.6537	18.5835
ENSG00000232671	0.156964	0.199681	0.305929	0	0.365226	0.1164	0.171498	0	0.171734	0	0	0
ENSG00000143393	17.8672	14.1109	16.979	8.66883	7.51661	5.89812	22.9701	26.8051	23.514	20.6494	11.0439	7.78487
ENSG00000143373	2.00859	2.29979	4.77674	2.54072	2.99497	2.66806	2.35688	3.24665	2.70524	2.27467	2.27234	1.75382
ENSG00000143390	9.28734	12.2462	3.43679	0.593576	3.9188	6.02299	20.9406	13.6132	22.2547	15.2469	4.0194	2.61133
ENSG00000143416	15.1303	12.6265	0.728218	0.289749	1.81582	0.878392	20.5926	13.3431	18.3707	16.8529	2.80752	2.20157
ENSG00000159377	66.7257	68.6232	40.1605	27.7697	53.2553	48.9305	132.839	97.6943	135.498	127.985	24.8784	21.5044
ENSG00000143442	8.91227	6.30755	7.24568	4.78979	9.13873	5.06325	8.26015	15.4582	6.07226	8.54982	13.7399	8.68403
ENSG00000143375	0.330192	0.0936403	0.813946	0.468368	0.15968	0.928122	0.156671	0.153536	0.0466552	0.142936	0.840962	1.17829
ENSG00000143367	2.28551	0.703388	46.4554	13.5673	39.5722	13.5556	3.93253	3.06646	3.90052	2.80299	5.93858	6.96743
ENSG00000143376	4.19591	3.84336	5.2906	3.09289	4.25363	2.97556	9.59485	15.5143	9.18564	5.95421	7.09182	5.69804
ENSG00000159409	0.0273998	0	0.0629526	0.0274574	0.0273031	0.197896	0.0211961	0.0255728	0.00722784	0.0747717	0.0122611	0.0500085
ENSG00000240510	0	0	0.0471764	0	0.0359631	0	0.0128697	0.0116039	0.0267901	0.0357034	0	0
ENSG00000178796	0	0	0.000458229	0.171312	0.100478	0	0.000532198	0.0774873	0.000531175	0.000466054	0	0
ENSG00000143436	25.7467	19.9946	21.8953	17.125	29.5293	23.2948	18.3164	20.3998	25.8355	18.1574	11.69	5.18489
ENSG00000143450	1.13311	2.33034	1.30234	1.12589	1.87953	1.46851	1.18749	1.43816	1.4414	1.79925	0.436102	0.501142
ENSG00000182134	0.570337	0.230033	2.33356	1.38501	1.4246	1.14073	0.642161	1.06772	1.02947	1.1899	0.887867	1.00892
ENSG00000213171	0.651493	0.846738	0.717052	0.493849	0.474817	0.61603	0.187855	0.457663	0.439219	0.450759	0.77102	1.10888
ENSG00000143365	0.0138359	0.00905339	0.0379847	0.0540698	0.0804155	0.0619061	0	0.0453645	0.0218314	0.0136138	2.0864	1.43914
ENSG00000225556	0	0	0.0954492	0	0.028927	0.0367249	0.0671504	0.0758741	0	0.0724757	0.0995213	0.0615546
ENSG00000196407	0.277547	0	0.583726	1.18137	0.37869	0.619167	0.151388	0.0708973	0.0510656	0.359944	10.0529	10.3634
ENSG00000159445	3.13985	1.5153	1.95298	3.00051	4.91528	1.88449	7.93527	6.51833	4.55008	6.24218	1.94388	1.26042
ENSG00000197747	76.2849	165.529	138.618	95.972	238.175	153.383	60.8409	86.4528	84.0438	111.127	40.8619	62.6503
ENSG00000163191	325.764	252.863	324.548	315.765	525.023	420.461	113.541	192.366	240.027	153.043	113.88	128.157
ENSG00000182898	0.00582511	0.0457838	0.0225224	0.0175495	0	0.0347562	0	0.00898886	0.0519452	0.0229444	0	0
ENSG00000159450	0	0.0157581	0.0927248	0.00905427	0.028251	0.00895371	0.00653231	0.0254884	0.0351662	0.00637533	0.324627	0.0595275
ENSG00000215853	0.0352935	0	2.46768	0.90377	0.145279	0.789676	0.0384377	0.131614	0.0786795	0.0810898	0.7404	2.73516
ENSG00000197915	0.0556878	0.220972	0.881165	0.277946	0.20496	1.62455	0.108429	0.371706	0.0382789	0.224158	1.6573	5.18497
ENSG00000143631	0.370491	0.213461	7.93077	7.93304	0.495716	12.8262	0.41218	1.03079	0.396416	0.414358	197.777	398.984
ENSG00000143520	0.115099	0.137204	2.8169	8.17962	0.313779	8.79179	0.144841	0.285022	0.268946	0.156076	138.389	237.538
ENSG00000143536	0	0	0.109672	0.204092	0.0266049	0	0	0.017447	0.0503654	0.0222278	8.50303	8.1862
ENSG00000186207	0	0.0730762	0.17792	0.211205	0.166098	0.0939542	0	0.097918	0	0.0110288	0	0.310006
ENSG00000169509	1.09183	1.43873	389.642	277.239	44.0551	40.367	3.2044	1.6662	5.1288	8.29847	1.58894	12.3823
ENSG00000185966	1.26282	1.09569	115.073	95.0894	12.3097	31.5321	1.18274	0.427259	1.75365	3.49984	1.14033	5.42472
ENSG00000163202	2.17632	1.3454	277.647	232.981	25.3138	59.2322	3.53427	2.31047	2.40204	12.641	1.94172	11.1648
ENSG00000244057	0.137887	0.157532	3.52276	5.54672	0.499631	2.29195	0.220204	0.0953634	0.136468	0.224935	0.0752077	0.269903
ENSG00000187238	0	0	1.50639	0.800358	0.124873	0.643407	0	0	0	0	0	0.0327874
ENSG00000185962	0	0	3.0032	1.7881	0.2755	0.473971	0	0	0	0	0	0.0366395
ENSG00000187223	0.839106	0	12.6339	16.3912	1.13193	6.60151	0.183911	0.137867	0	0.687064	1.50594	5.32722
ENSG00000187180	0.193234	0.202695	11.5575	12.6228	0.495185	10.4145	0.443391	0.0606847	0.30513	0.450674	2.47793	18.6816
ENSG00000159455	0.11509	0	10.8019	8.76156	0.478458	10.0945	0.00801729	0.138399	0.220896	0.261364	4.32917	21.1313
ENSG00000187173	0.00757185	0.105738	12.7048	9.99725	0.323483	4.7316	0.0992983	0.491095	0.364026	0.510312	0.239999	7.83835
ENSG00000187170	0	0.0228374	0.348552	0.0176309	0.0208463	0.593206	0	0.0272962	0.076724	0.0172542	1.80009	0.0227397
ENSG00000198854	0	0	1.42575	1.43072	0.17748	4.666	0	0.0387593	0	0	0.275379	2.04213
ENSG00000203786	0.204799	0.0446039	8.7903	24.9306	0.942561	7.43145	0.130141	0.144692	0.284923	0.519972	3.41904	12.4679
ENSG00000240386	0.534086	0	8.28691	22.3877	1.17039	10.8149	0.0980915	0.219143	0.557566	0.0143679	0.917073	9.43684
ENSG00000186226	0.0773713	0.0163346	4.94094	6.55821	0.416369	0.986562	0.055729	0.0580984	0.0577061	0.0960899	0.0581265	0.696412
ENSG00000172155	0.0611024	0	1.82142	6.23102	0.069531	1.11131	0.216824	0	0.0268915	0.103866	0.539155	0.627582
ENSG00000197084	0.184121	0.0879096	4.54958	14.9303	0.940875	9.18082	0.171983	0.257261	0.545272	0.257765	3.21559	19.8292
ENSG00000196734	0.141271	0.0890899	7.91478	15.181	1.15079	10.486	0.175513	0.0905676	0.1523	0.435324	1.56719	12.9555
ENSG00000186844	0.0383063	0.198573	11.4716	24.1	1.11069	9.16757	0.17826	0	0.102462	0.328869	1.9949	11.9309
ENSG00000235942	0.0775861	0	8.46731	18.7079	0.99305	8.97623	0.423832	0.177279	0	0.223909	2.88019	9.23709
ENSG00000163206	0.121261	0	0.0589569	0	0	0	0	0	0	0	0	0
ENSG00000163207	0.855184	0.817657	110.582	58.4239	12.3686	21.7842	1.29725	1.8103	5.71739	4.19942	7.11229	9.92045
ENSG00000184148	0.517348	0.25748	3.14571	0.287293	0.301617	1.64445	0.010087	0.0987573	0	0.124986	0.810777	0.573648
ENSG00000169474	1.47795	1.90812	232.543	168.957	26.2007	135.048	1.8938	6.7618	10.9617	7.9915	28.8636	83.209
ENSG00000163209	0.0525791	0.744098	111.074	50.7506	10.9854	7.59888	0.856891	0.2817	7.07486	2.31108	0.739357	0.729658
ENSG00000169469	8.9367	3.20683	518.556	346.371	49.9399	407.832	7.21738	16.6556	26.5028	23.3331	90.2703	124.286
ENSG00000163216	2.02986	2.53206	661.197	537.848	42.1443	96.3323	6.42596	1.73512	5.07922	13.3855	8.16804	13.9569
ENSG00000241794	0.699159	1.33064	252.962	116.29	7.71544	14.9558	2.2256	0.590025	0.419333	5.02549	6.20281	15.3541
ENSG00000196805	1.16952	0.988004	153.338	141.114	10.3365	25.8422	2.15575	1.05735	1.48769	5.48163	4.25657	6.98667
ENSG00000203785	2.31355	1.31569	288.952	152.098	7.77268	21.6818	2.94555	1.04573	1.53414	6.39143	23.8484	50.3118
ENSG00000244094	0.364146	0.297977	43.4542	31.6619	2.30309	8.07659	0.588867	0.320738	0.463701	1.22486	1.57865	1.74762
ENSG00000159516	0.379527	0.455027	87.0732	52.9834	2.29106	13.095	0.523348	0.612512	0.095583	3.54383	16.7723	63.4222
ENSG00000203784	0.0969524	0	0.0946959	0.142104	0	0	0	0.0735655	0	0	0	0
ENSG00000203783	0.374873	0.0625421	8.2677	4.21828	8.5021	3.90648	0.105253	0.070259	0.195023	0.0353348	0.195783	0.00567407
ENSG00000203782	0.144666	0.0234328	2.73494	7.48586	0.0423662	2.85324	0.118305	0.138851	0.160152	0.141215	44.4108	137.503
ENSG00000159527	0	0	6.2057	1.82054	0.133823	1.87082	0.124615	0	0.189662	0.0928948	5.26616	5.99891
ENSG00000163218	0.0235516	0.0880999	5.02603	1.78624	0.575664	1.64269	0.0256643	0.154096	0.17095	0.268443	3.67292	3.10571
ENSG00000163220	11.6855	2.9418	423.453	537.462	137.602	367.532	5.07123	27.0818	489.302	44.7509	233.872	286.676
ENSG00000163221	0	0.124344	0.577906	0	0.114329	1.31373	0.107825	0.149573	2.35995	0.659033	0.136718	0.379573
ENSG00000143546	5.11941	1.19829	170.204	236.875	116.197	244.524	1.81791	34.0328	411.619	47.7116	274.178	376.438
ENSG00000184330	0.13303	0.0320048	0.0220182	0.088353	0.139555	1.73596	0.0672826	0.933493	10.1741	2.27257	10.5667	16.9219
ENSG00000197364	0	0	0	0	0	0	0.0945532	0	0.290888	0	0.26683	0.530496
ENSG00000143556	1.19105	0.450151	1.37676	0.869747	0.2775	11.212	0.52579	7.17315	77.574	20.3515	178.927	262.029
ENSG00000197956	1300.88	972.35	766.397	644.352	1152.94	567.637	268.868	220.187	576.054	386.462	75.9432	63.6095
ENSG00000196420	0.404141	0.343211	0	0	0.468459	0	0	0	0.219707	0	0.275662	0.0851289
ENSG00000196154	383.085	315.778	1.76478	2.55	1.66319	2.53941	19.7552	5.16238	15.3294	6.07946	36.6857	36.5461
ENSG00000188015	3.29403	3.3587	0.66534	1.88612	1.31152	0.885935	0.280548	0.725637	1.76365	0.944798	0.591701	0.327814
ENSG00000196754	26.3079	4.54033	540.08	326.982	970.711	930.537	7.63196	27.4497	424.289	49.2539	36.9214	57.9333
ENSG00000188643	79.6069	62.159	224.21	160.985	200.869	175.437	5.26558	8.9873	57.8791	13.9802	49.5604	71.7347
ENSG00000189334	4.36971	1.03618	236.415	178.332	171.024	184.479	1.60228	3.95366	55.8543	8.3459	73.0918	95.4301
ENSG00000189171	67.9737	107.573	18.1402	14.6155	35.3959	23.687	20.1314	24.1321	53.4755	65.4166	8.55982	7.39211
ENSG00000160678	0.78804	1.108	0.241894	0.362388	1.48449	1.78322	3.35411	4.09833	11.9641	11.0043	0.572383	0.362735
ENSG00000160679	19.2105	19.1741	29.0395	16.6757	32.2835	22.8266	21.3718	26.1213	22.1608	23.1505	15.4822	8.08029
ENSG00000143553	11.3339	10.844	11.7324	4.59857	12.6359	9.99496	12.6361	14.0385	15.8806	12.8818	4.50212	6.28438
ENSG00000143621	60.0269	59.3963	49.4297	33.3307	62.6565	63.4166	61.7388	74.461	81.4948	70.4152	19.9931	20.7266
ENSG00000169418	0.7341	0.665715	0.715044	0.351743	0.234099	0.200701	0.167843	0.423198	0.322127	0.383333	0.767521	1.36691
ENSG00000143624	3.30652	5.32677	6.08386	4.34198	4.69276	3.53243	3.47525	9.50048	4.1159	4.4732	6.20936	4.36841
ENSG00000143554	0.565544	1.91354	0.962384	0.670114	0.190921	1.70909	10.1675	17.8903	18.3363	5.90148	1.97834	1.73322
ENSG00000143614	1.10244	0.784762	2.51861	1.21069	0.890786	1.10444	0.761818	2.54697	0.994617	1.1084	3.51132	3.72532
ENSG00000198837	0.630647	0.80718	1.12634	0.887879	0.976725	1.44163	1.17629	3.06418	1.15687	0.877917	0.919333	0.650204
ENSG00000160741	1.91324	2.02765	1.37856	1.47234	1.8625	1.92605	1.59934	2.78732	2.38488	1.65648	1.53172	1.29829
ENSG00000143570	22.0079	20.5363	16.6665	8.55397	9.68973	10.3515	19.9226	19.5671	24.2051	20.1395	6.3042	4.49072
ENSG00000143578	1.27336	1.68591	0.583871	0.832786	1.23551	1.58655	0.942581	2.08299	3.1081	1.59756	1.18377	1.5914
ENSG00000143543	33.5855	37.7555	24.6871	25.4954	34.3469	29.5695	26.0985	25.7581	30.3105	28.9634	10.7099	13.3606
ENSG00000143545	54.2688	31.0921	9.00616	7.00674	11.4324	9.55418	24.6806	24.8774	32.1673	23.8915	9.17465	8.4287
ENSG00000177954	274.339	229.42	154.057	298.215	207.699	140.523	234.451	115.561	257.484	219.215	197.791	156.762
ENSG00000143552	0.0843003	0.0774743	0.210224	0.0296631	0.0232393	0.206023	0.0430324	0.0326568	0.0658735	0.164829	0.212209	0.0523076
ENSG00000143549	116.858	101.38	59.462	26.303	57.4115	60.1161	113.683	130.73	116.22	114.798	27.2805	28.813
ENSG00000163263	0	0	0	0	0	0	0	0.107742	0	0	0	0
ENSG00000143612	79.4724	61.311	62.0544	48.4169	91.8938	54.4109	117.403	89.9022	130.717	97.9791	23.3075	25.3741
ENSG00000143569	10.9551	11.5094	18.2454	5.36454	8.50595	10.5678	16.5374	36.8665	14.1434	10.4302	11.3481	9.5377
ENSG00000143575	27.1065	22.685	16.7939	15.1208	37.7121	29.6607	28.4269	24.1102	41.4615	26.2587	6.93698	8.02624
ENSG00000143595	0	0.0471934	0	0	0.0283468	0	0	0.0185884	0.0210072	0.0591908	0.0253584	0.0904564
ENSG00000143515	22.5945	21.9875	1.24009	0.982985	0.689028	2.03697	5.86338	7.33285	5.4187	4.73658	3.00296	2.54755
ENSG00000160712	1.26814	1.09916	9.54292	6.20564	3.18967	0.791138	3.97885	6.67358	3.23046	1.9578	1.88677	1.87241
ENSG00000169291	0.0980437	0.186869	0.299572	0.138049	0.106668	0.11375	0.367221	0.455219	1.50291	0.515792	2.34066	1.76184
ENSG00000163239	0	0.0317412	0.0471812	0.0365558	0	0	0.0531097	0.0281313	0.0509004	0.0721507	0.426359	0.121699
ENSG00000160714	5.00663	4.18332	4.82762	2.31185	2.35323	3.36008	5.44587	5.5953	5.11057	4.95982	3.31723	2.34986
ENSG00000160716	0.332513	0.436464	0.215293	0.341537	0.149884	0.237537	0.218259	0.352398	0.382968	0.258189	0.354594	0.289666
ENSG00000160710	28.4113	29.5862	35.3495	13.2422	25.0395	13.3141	42.4061	66.2111	43.1803	36.8725	20.6753	18.0571
ENSG00000268141	0	0	0	0	0	0	0	0	0	0	0	0
ENSG00000143603	0	0.0527517	0.033038	0.0333901	0.0342242	0.0343844	0.0210573	0.0934836	0.013238	0.126586	0.665872	0.301238
ENSG00000163344	7.74005	8.17292	14.6022	6.65378	8.17639	6.23826	8.2312	10.4535	12.0571	8.87863	6.73872	7.23725
ENSG00000163346	10.7201	9.88576	2.29904	0.939378	0.925524	1.14682	7.30886	3.77323	7.76409	4.61165	5.27012	3.76118
ENSG00000163348	2.25163	3.11318	4.13905	3.28821	2.85949	3.00099	3.18887	5.53265	3.34399	3.33618	3.65667	3.11603
ENSG00000160691	64.8888	51.5385	33.7188	25.7224	82.1833	43.3268	36.8782	37.7599	56.4927	41.727	11.2882	8.48009
ENSG00000173207	11.8823	12.3944	12.1141	13.0023	70.4382	52.5456	33.7633	41.8741	48.1558	44.5988	12.4625	7.53508
ENSG00000160688	5.14947	4.02339	5.0507	6.53716	10.1345	7.87464	9.35431	8.86905	9.64795	7.10647	3.10287	3.33248
ENSG00000163352	0.0900985	0	0	0	0.104623	0	0	0.102684	0	0	0	0.230517
ENSG00000160685	3.13448	3.84623	7.37187	8.68301	6.77082	5.64066	2.93012	3.43436	7.47008	2.30701	9.53317	6.29397
ENSG00000163354	0.0712482	0.0232692	0.103993	0.133889	0.0627836	0.0265553	0.0194045	0.0549058	0.07167	0.0175012	0.478169	0.48273
ENSG00000163357	0	0.0267587	0.0198442	0	0.0240845	0	0.0951062	0.0822839	0.0216344	0.0285434	0.055113	0.0724507
ENSG00000143537	7.76286	6.67348	18.2493	19.0845	22.5128	19.1326	22.5821	14.865	20.3855	10.4422	11.8578	11.3147
ENSG00000243364	1.30012	1.32106	2.04859	1.26073	0.797366	0.31944	0.702344	1.08698	1.22237	0.78919	3.1724	2.17369
ENSG00000143590	0.223345	0.0984017	1.1518	1.04773	0.0997435	0.759767	0.0529198	0.170057	0.593331	0.148718	2.84275	3.85835
ENSG00000251246	1.12582e-22	4.53442e-14	1.02358e-28	1.18755e-14	0	1.61971e-63	8.71416e-14	0	1.60707e-162	5.24097e-41	5.36587e-09	7.0247e-12
ENSG00000169242	0.456319	0.157962	11.9733	6.43527	5.79399	3.55665	1.45805	1.30942	6.94762	2.23214	13.6698	5.40811
ENSG00000169241	13.8862	10.5335	38.7839	20.7509	28.9015	11.2645	15.8829	10.6444	25.2443	17.2695	3.40468	3.05786
ENSG00000179085	7.76654	6.53512	4.57474	3.08355	3.98729	3.53341	9.01989	5.41499	10.6311	7.70096	0.374057	0.883456
ENSG00000163463	15.8422	13.6776	13.7207	10.2567	15.6387	14.5127	7.04003	15.4002	14.5381	15.083	5.01477	7.48546
ENSG00000163462	0.44939	0.762765	0.240161	0.368059	0.145725	0.282828	0.190846	0.490421	0.376933	0.190324	0.185598	0.164444
ENSG00000185499	0.537506	0.380517	0.200829	0.145434	0.155292	0.0711446	0.117352	0.0989491	0.0718911	0.141221	0.6567	0
ENSG00000169231	7.17812	6.24607	3.34413	1.17578	1.80639	1.34389	2.1424	2.11205	3.19467	1.91661	2.67494	1.70611
ENSG00000173171	9.98535	10.8802	10.5442	5.52909	11.0833	11.405	14.6958	14.0986	15.7017	11.8756	3.28306	3.55874
ENSG00000177628	16.8346	12.4242	25.2015	8.83154	3.71827	8.12484	18.8245	21.6955	17.0293	13.9451	2.7707	4.2058
ENSG00000160767	1.38313	1.1876	1.03126	1.1086	0.796995	1.77673	0.556353	3.87572	1.87088	1.61405	1.09473	0.937038
ENSG00000116521	19.5806	17.4206	22.4707	8.95286	11.1942	6.53458	33.1378	32.238	38.6747	27.6459	3.52128	2.85818
ENSG00000176444	4.54635	3.22236	4.93428	3.3082	4.1885	2.32847	3.28839	6.54624	3.21128	3.64173	5.85593	4.09063
ENSG00000143627	0.0102954	0	0	0	0	0	0.0280404	0.0317183	0.137368	0.040423	0.0230273	0.042738
ENSG00000143630	0.36095	0.221674	0.343429	0.305881	0.082255	0.0841295	0.153553	0.252404	0.176044	0.116642	0.566292	0.406473
ENSG00000160752	47.2866	37.7295	21.4113	20.2184	34.7434	48.1229	73.5987	42.299	97.1517	63.1734	6.224	7.19994
ENSG00000160753	2.4031	2.66656	4.2953	2.97169	1.5803	2.04191	2.12139	4.57278	2.28295	2.30484	2.79722	2.37282
ENSG00000116539	7.36621	8.38554	13.3826	6.89736	6.57037	7.98753	4.02153	5.89295	4.33182	4.25736	15.3063	12.12
ENSG00000125459	3.53358	3.72695	4.14126	3.44398	6.87174	5.61175	4.58193	6.95413	3.61019	3.75729	2.76389	2.32783
ENSG00000163374	8.5558	11.2112	19.2216	9.12875	10.2943	6.29058	8.02483	10.0804	9.65443	9.50361	10.9558	11.1682
ENSG00000132676	30.2537	27.3256	32.1413	22.0686	54.1121	23.7148	33.6868	32.8186	31.9076	33.0182	16.0451	15.537
ENSG00000116580	3.68333	4.4181	6.51373	2.43173	3.99345	3.50256	4.07324	5.2947	3.49183	4.24001	4.57357	4.48127
ENSG00000132718	8.83122	6.38186	0.276798	0.161754	0.212967	0.271265	4.03202	4.40344	4.0022	3.91117	0.942	0.980314
ENSG00000143622	12.1481	9.77843	22.5362	11.3112	6.02961	3.02134	13.1047	10.6665	15.1012	10.8923	7.57106	5.9818
ENSG00000132680	10.0234	7.11103	23.5223	10.7207	8.0132	8.95041	7.84226	10.1633	10.9972	8.06459	8.68374	8.45102
ENSG00000173080	0	0.101146	0	0	0.137263	0.232613	0	0.0299883	0.0432255	0.0762118	0	0.0981089
ENSG00000116584	3.61923	6.48466	7.22642	6.08956	8.54756	6.31874	4.84711	10.5114	3.52383	3.70668	2.33351	1.30845
ENSG00000163479	186.909	128.272	137.582	68.3675	80.0212	42.8016	135.195	84.1974	124.418	93.4576	18.4907	19.2597
ENSG00000160803	5.32648	4.13634	5.64213	2.90648	4.66883	4.96286	5.37936	7.99716	5.28238	5.17302	2.50809	3.0823
ENSG00000116586	5.75606	7.05518	3.01871	6.79519	4.79041	4.05127	5.23968	7.36842	10.9921	8.99222	1.7222	2.25201
ENSG00000132698	0.694949	0	26.4103	20.6281	16.3169	11.1918	0.133751	0.439038	5.12972	1.31463	17.3472	22.2347
ENSG00000254726	0.228029	0.208946	0.128965	0.0527956	0.0512859	0.0859085	0.384943	0.547302	0.490553	0.682741	0.0784436	0.11623
ENSG00000160789	68.3825	86.49	43.2603	40.5704	45.5715	41.9936	88.7602	104.544	82.6479	65.1444	58.9094	47.5769
ENSG00000196189	0.255005	0.129766	3.29338	1.54076	2.33043	2.04528	0.131167	0.129569	0.364395	0.104534	5.31111	4.42829
ENSG00000160785	5.14819	4.62441	6.71257	2.07199	2.58224	2.386	9.48604	9.81982	6.45941	8.38292	1.91398	3.28982
ENSG00000260238	1.05877e-16	0.434117	0.371702	1.7676	0.475876	0.753433	0.41651	0.585613	8.83953e-10	0.166487	0.681291	6.71777e-96
ENSG00000160783	8.40469	8.8286	13.4525	6.20859	11.1071	7.9115	9.83097	11.5003	11.0799	10.6199	6.3738	3.96061
ENSG00000242252	4.76331e-107	5.53689e-310	0.0922013	9.18453e-44	9.52084e-171	7.72712e-49	1.40459e-77	3.31007e-95	1.75125e-117	9.75262e-195	2.86286e-68	0.082083
ENSG00000160781	0.0293689	0.162088	0.175083	0.169664	0.106153	0.219289	0.073889	0.167347	0.0544856	0.0794918	0.118808	0.0281998
ENSG00000198952	5.77777	5.71942	11.3357	5.51633	7.75296	8.46886	4.71434	10.2384	4.2787	4.09553	4.29777	2.60703
ENSG00000163472	0.360956	0.599798	10.3686	4.30117	1.93584	3.80844	0.563255	0.846265	1.00907	1.03833	5.60165	4.55027
ENSG00000198715	10.1067	7.9827	3.73157	2.02531	0.828392	2.77336	25.8576	17.4197	18.1569	15.5697	1.31725	0.678886
ENSG00000189030	0.185333	0	0.0699485	0.133343	0.0523312	0	0.0558054	0.0817298	0.00274478	0.0943278	0.26504	0.00703427
ENSG00000163468	126.572	98.3401	90.1851	74.7659	125.877	118.354	188.365	247.36	245.673	204.589	61.7919	47.4345
ENSG00000163467	0.031437	0.0344361	0.562801	0.232901	0.988105	0.359338	0.0724576	0.136598	0.0172722	0.251881	0.0486945	0.312777
ENSG00000132677	0.112999	0.0968707	0.210415	0.0388965	0.0803135	0.108239	0.0780957	0.136266	0.0527344	0.0856442	0.360371	0.358393
ENSG00000125462	0	0	0	0	0	0	0	0.0832775	0	0.156397	0.509377	0
ENSG00000116604	1.25755	1.50957	2.4553	1.18381	1.52459	1.06404	0.781683	2.42495	0.983018	1.41143	1.62552	1.26187
ENSG00000183856	0.450404	0.802815	0.174439	0.344985	1.36203	3.77076	2.84818	5.4789	2.19781	2.05733	0.345681	0.715687
ENSG00000187862	0	0.0284897	0.0333691	0.00571969	0	0	0	0.0570616	0	0.0210337	0.0465163	0
ENSG00000163382	10.6006	6.088	16.486	11.6784	14.8752	13.6235	19.0495	27.936	25.2944	19.273	4.82391	3.85803
ENSG00000160818	5.68405	2.7593	4.68817	3.05677	10.5267	10.7514	5.75108	6.12911	5.61329	6.45169	2.8131	2.53633
ENSG00000132702	0.104569	0.33653	0.047323	0.156174	0.061116	0	0.0570811	0.120116	0	0.0513011	0.142378	0.0659857
ENSG00000132692	0.219798	1.06795	0.316926	0.131154	2.38223	0.733354	4.86541	18.606	10.6835	12.6345	0.776758	0.693232
ENSG00000132688	1.64833	1.66618	0.0727373	0.0563803	0.0425233	0.0602357	0.781414	3.34998	1.57257	2.51762	0.619565	0.491642
ENSG00000143320	3.36938	5.06971	1.00131	0.682959	0.279676	0.356607	0	0.744908	0.429202	0.331666	12.0416	14.8803
ENSG00000143319	3.16236	2.75211	5.99754	3.1333	4.55707	4.36853	5.44853	7.2156	4.29207	5.13892	3.19473	2.98242
ENSG00000143303	2.45248	1.84255	5.78239	4.91993	4.11979	4.73483	2.89099	2.42293	3.70083	2.04951	2.54151	1.78766
ENSG00000143314	14.3024	10.4193	13.0079	7.97857	24.217	15.3721	23.0401	22.4696	27.6081	19.1113	6.89629	5.52401
ENSG00000143321	56.2647	47.8299	55.4501	24.1303	64.3267	50.0728	41.4277	53.3473	52.7389	40.6174	14.7466	16.7508
ENSG00000143294	8.68347	9.96729	13.451	11.5647	12.6294	5.94123	7.16301	14.9062	12.2702	13.3071	6.12173	4.98176
ENSG00000027869	0.0272491	0	0.343064	0.163363	3.31029	1.82668	0	0.04192	0.211694	0.0266836	0.0367131	0.0681168
ENSG00000198400	0	0.0914902	0	0.0263197	0	0.0260991	0	0.0202368	0.045281	0	0.0218253	0
ENSG00000027644	0	0.0214087	0	0.0246085	0.00960121	0	0.0266526	0.00314971	0	0.0160886	0.0109095	0.00506343
ENSG00000187800	0.239718	0.0561516	0.223354	0.0129089	0.931863	0.208641	0.0372906	0.00462674	0.0764117	0.0253197	1.0134	0.765215
ENSG00000160838	0.010983	0.0859294	0.0425184	0.0329784	0	0	0.0239347	0.118396	0	0.0215508	0	0
ENSG00000132694	3.13138	3.69616	2.08069	1.12276	1.38947	1.17547	8.56031	15.1423	6.36658	6.38548	2.06868	1.98174
ENSG00000253831	0.0761837	0.141929	0.200125	0.163407	0.187425	0.259523	0.213456	0.293316	0.181456	0.27535	0.277996	0.316766
ENSG00000117036	5.52363	5.08597	10.25	3.0896	5.46037	4.99109	10.2687	9.54736	7.29128	8.71748	13.716	11.5495
ENSG00000143297	0.309556	0.174493	0.197052	0.651076	0.22938	0.747039	0.0697566	0.14411	0.188691	0.20067	0.157646	0.416868
ENSG00000163518	0.0243	0.0318249	0.0411075	0.0548983	0.0142886	0	0.00661634	0.0328075	0.027083	0.0119622	0.135599	0
ENSG00000160856	0.0176458	0.0422158	0.0255749	0.0931167	0.0207631	0.0754217	0.0351243	0.0578927	0.0196843	0.00792207	0.0963667	0.0766737
ENSG00000132704	0.0329395	0.0677684	0.0504321	0.0467905	0.137452	0.294399	0.198596	0.240342	0.0722516	0.0305675	0.29798	0.25944
ENSG00000163534	0.0165126	0.0163752	0.0391321	0.0368979	0.0335929	0.116521	0.0698795	0.0388042	0.0488931	0.0278681	0.152222	0.084474
ENSG00000073754	0	0	0.0188922	0.0146692	0	0	0	0.00752112	0.0434347	0	0	0
ENSG00000183853	5.98654	11.494	1.56513	1.24487	3.93382	4.54813	8.98702	12.2539	5.60121	8.14988	2.15069	1.708
ENSG00000158473	0.0568898	0.0495209	0.220156	0.0569958	0.133658	0.0188459	0.0206598	0.146102	0.210946	0.167622	0.038198	0.0708903
ENSG00000158477	0	0.0533854	0	0	0	0	0	0.0315123	0	0	2.90675	1.3135
ENSG00000158481	0.0541861	0	0	0	0.0717632	0.0805329	0.0333598	0	0	0	2.4635	1.10163
ENSG00000158485	0.0442502	0	0	0	0	0	0	0	0	0	0.220669	0.445229
ENSG00000158488	0.043645	0	0.0291445	0	0	0	0.032792	0.0486563	0	0.157979	1.53156	0.370531
ENSG00000186306	0	0.0935711	0	0	0	0	0	0.0370736	0	0	0	0
ENSG00000180708	0	0	0.0236657	0	0	0	0.0265916	0	0	0.0473713	0	0
ENSG00000173285	0	0	0	0	0	0	0	0	0	0.040929	0	0
ENSG00000198965	0	0	0	0	0	0	0	0.0345174	0	0	0.0611055	0
ENSG00000197532	0.0465748	0	0	0	0	0.0692659	0	0	0	0	0	0
ENSG00000186440	0	0	0	0	0.0559894	0	0	0	0	0.0465511	0	0.120617
ENSG00000186400	0	0.0598768	0.0450561	0	0	0	0	0.0355684	0.0512377	0	0	0
ENSG00000198967	0	0.187797	0	0	0	0	0	0.0372048	0	0.047205	0	0
ENSG00000163554	0.490423	0.453851	0.227804	0.484617	0.296929	0.353637	0.268382	0.253301	0.299157	0.348941	0.461384	0.57655
ENSG00000196171	0	0.0779138	0	0	0.0235038	0.0298755	0	0.0308085	0	0.0391415	0	0
ENSG00000203757	0.0482263	0	0	0	0.0187935	0	0.0526149	0	0	0	0	0
ENSG00000180433	0	0	0	0.0569443	0	0	0	0	0	0	0.0515937	0
ENSG00000197403	0	0	0.0428026	0	0	0.0328046	0	0	0	0.0429334	0	0.0277351
ENSG00000188340	0	0	0	0.0712963	0	0	0	0	0	0	0	0
ENSG00000163563	0.0741672	0.109002	0	0.296671	0.0290143	0.253063	0.195009	0.13318	0.356936	0.0242311	1.58109	2.42507
ENSG00000163564	1.09747	0.885538	0.831788	1.13397	0.853328	0.574566	3.14165	2.86095	2.52128	1.47726	0.964564	0.751284
ENSG00000163565	68.8169	61.8541	36.5558	21.5358	44.7939	25.6289	134.818	160.248	101.936	134.767	25.7974	20.954
ENSG00000163568	1.04359	0.266512	0.302688	0.193017	0	0.204063	0.304286	0.302324	0.0871749	0.233712	0.530756	0.578826
ENSG00000162706	0.202959	0.212705	0.0968186	0.00562263	0.235513	0.0498345	8.41516	1.25905	2.50194	2.73728	1.94524	2.73343
ENSG00000213088	0	0.054052	0	0	0	0	0.27199	0.138414	0	0.122035	2.7423	3.11489
ENSG00000179639	0.0615455	0	0	0.11463	0.0717991	0	0	0.0472642	0.0849223	0.0561508	9.82001	6.62323
ENSG00000196266	0	0	0	0	0.0376149	0	0	0	0	0	0	0
ENSG00000196184	0	0	0	0	0	0	0	0	0	0.040275	0	0
ENSG00000184155	0.0430362	0	0.0417583	0	0.0503571	0	0	0	0.0475518	0	0	0.0541025
ENSG00000132703	0	0	0	0	0	0	0	0	0	0	0	0.0623964
ENSG00000132693	0.0424538	0	0	0.1067	0	0	0	0.0714893	0	0.0696121	0.028661	0.0533589
ENSG00000158716	7.41011	3.96242	4.86449	1.98779	4.45772	3.37651	9.89921	7.02072	7.63677	5.25249	4.43875	4.72446
ENSG00000181036	0.0215255	0.0561483	0.0863752	0	0.311108	0.132267	0.128998	0.0663037	0.0717829	0.0422437	0.115742	0.0939683
ENSG00000158714	0.133894	0.113894	0	0	0	0	0	0.0434772	0	0.0138666	0.377816	0.387081
ENSG00000188004	0.161728	0.133319	0.0986732	0.0255677	0.142711	0.190128	0.0926101	0.185338	0.0630801	0.142042	1.02666	0.603397
ENSG00000243284	0.15423	0.0309724	0.0230114	0.0713358	0.11161	0.212531	0.012952	0.0548918	0.0264075	0	1.887	2.15133
ENSG00000213085	0.257877	0.274946	0.22693	0	0.0825567	0.40589	0.0766385	0.18046	0.104182	0.0919519	0.252302	0.380388
ENSG00000269620	0	0	0	0	0	0	0	0	0	0	0	0
ENSG00000158710	36.8105	59.923	38.5533	34.0504	48.1353	59.9465	40.7746	73.191	57.9758	64.3682	35.2502	44.5008
ENSG00000085552	0.105189	0.048217	0.522384	0.497377	0.406464	0.843422	0.0650831	0.0921596	0.00807419	0.0259794	1.12625	0.58247
ENSG00000162723	0	0.14042	0.3003	0.288991	0.407912	0.618101	1.90942	2.32709	1.08285	2.6505	0.0523893	0
ENSG00000143315	0.95099	1.21756	0.810794	0.543928	0.58236	0.35753	1.5638	1.73061	1.28374	1.65512	1.04405	1.56734
ENSG00000177807	0.0265067	0.0290438	0.0376759	0.0258072	0.0320261	0.013879	0.00528774	0.0156249	0.0115833	0.0301225	0.0911033	0.157482
ENSG00000162728	0.0939128	0.0551295	0.096088	0.0170001	0.0833522	0.0511058	0.0237782	0.0894795	0.0771504	0.0812534	0.166629	0.0726433
ENSG00000162729	2.3715	2.26157	1.92138	1.1355	0.604046	1.08061	11.1895	19.2835	15.3182	11.3402	1.31641	2.03268
ENSG00000018625	0.0536055	0.120733	0.0500401	0.0133519	0.0359566	0.0458327	0.0481484	0.0763077	0.0405411	0.0765743	1.90517	1.2648
ENSG00000132681	0.0145526	0.0691266	0.0457123	0.0575577	0.0616481	0.0774335	0.181266	0.177572	0.236274	0.163049	0.0713651	0.0858847
ENSG00000143318	0.188865	0.118177	0.213386	0.078612	0.12088	0.188183	0.289285	0.0938024	0.295326	0.140859	0.822771	0.250823
ENSG00000162734	148.441	118.503	40.5086	16.9455	26.4856	18.8518	46.9998	45.8954	31.8391	33.2097	12.4988	10.3813
ENSG00000132716	12.3197	10.5812	7.90008	5.008	9.35305	9.88427	11.3062	13.0291	11.9008	9.14138	11.2472	8.8063
ENSG00000258465	2.17687	2.07344	2.65158	1.03001	3.13733	0.0668698	4.1121	2.28352	5.28899	3.10075	3.41023	0.739557
ENSG00000162735	13.3263	12.2379	14.2117	8.53021	11.9223	7.21326	16.3544	17.717	19.8343	16.7719	6.41345	6.30296
ENSG00000122218	80.9612	75.8992	61.1186	30.9127	47.0764	24.5515	52.3633	44.1672	52.1329	43.6514	14.5673	15.9953
ENSG00000162736	24.9266	36.2655	20.4294	9.5812	19.0015	10.2101	28.8725	27.2791	21.1414	23.6026	10.8691	10.7679
ENSG00000171786	0.132594	0.0119668	0.0741403	0.00623174	0.01113	0.0393154	0.12395	0.0502507	0.024481	0.0651689	0.0419152	0.0270836
ENSG00000162738	0.140158	0.104929	1.30725	0.476188	0.384614	0.595137	1.11707	1.33839	0.692176	0.865943	3.46929	2.6338
ENSG00000162739	0.0648979	0.262876	0.0512529	0.064149	0.0826439	0.159307	0.0944464	0.108941	0.0205342	0.101156	0.627126	0.291002
ENSG00000066294	0.0747235	0.187433	0.183793	0.236016	0.0967098	0.0892871	0.115421	0.0858703	0.103726	0.129092	0.873556	2.03401
ENSG00000117090	0.020846	0.0136931	0.0143611	0.0677317	0.0519353	0	0.0484258	0.034152	0.029124	0.0221302	0.0304683	0.112723
ENSG00000117091	0	0.103087	0.0934108	0.118941	0.0932853	0.393524	0.0262875	0.0491361	0.220303	0.0388399	1.74734	1.35216
ENSG00000026751	0.062383	0.126187	5.50841	1.87069	2.21551	1.45717	0.142741	0.198327	0.45909	0.182446	0.780134	1.11961
ENSG00000122224	0.0946241	0.224749	0.0359351	0.0448836	0.0189451	0.0446396	0.100584	0.136618	0.218835	0.0789933	0.255045	0.149952
ENSG00000122223	0	0	0	0.0741241	0.0203002	0.109116	0	0	0	0.0254672	0.278213	0.322722
ENSG00000179914	0	0.0488701	0	0	0	0	0	0.0289691	0	0	0	0
ENSG00000158764	0	0	0.0377173	0.0580703	0.0455377	0	0	0	0	0	0.368501	0
ENSG00000158769	0.534742	0.83489	41.674	19.7907	24.383	16.2506	4.8516	7.08641	4.56266	5.74358	13.6856	15.1543
ENSG00000215845	0.49207	0	13.0849	15.5924	16.0099	7.3594	1.60669	3.09067	3.96639	1.92551	5.62951	7.52298
ENSG00000158773	7.01143	6.10077	7.09082	5.83912	4.53801	5.84761	7.66719	11.2944	10.7362	8.20553	5.26356	4.88539
ENSG00000186517	0.0970959	0.105911	0.619678	0.92879	0.198767	0.0964514	0.108394	0.142175	0.121085	0.106931	1.56997	0.960141
ENSG00000268154	23.5934	11.4423	29.7397	11.6781	14.0931	8.69017	16.3015	17.9847	7.89152	14.7026	30.4714	26.7621
ENSG00000143217	0.22994	0.120461	24.7018	10.9746	2.68539	2.67724	0.3409	0.405617	1.12784	0.635144	12.7902	9.74904
ENSG00000162755	0.0673164	0.0436618	0.358846	0.402745	0.118333	0.150337	0.110087	0.063653	0.0745747	0.0328835	0.090929	0.0421663
ENSG00000143256	21.3645	21.7313	29.1884	23.5992	81.1938	34.1435	25.5666	30.3094	32.4666	28.9008	3.98995	5.85952
ENSG00000158796	9.85019	7.02398	11.3847	5.87253	9.54842	5.23745	6.16841	7.62342	6.97757	4.85796	4.29769	3.67007
ENSG00000158793	2.52577	2.8103	10.2886	5.59171	9.22953	5.49695	1.72046	4.30272	2.38386	2.54148	2.80202	2.04867
ENSG00000143222	35.1621	25.8201	37.9696	21.3291	15.9581	9.95774	22.3198	17.6297	25.2531	24.7618	10.7925	12.1763
ENSG00000143258	1.99073	1.81744	1.90303	1.25392	1.54034	0.773698	1.65393	3.42053	2.05238	1.50688	2.27075	1.56618
ENSG00000143224	2.25407	2.3675	1.36809	1.05177	2.14275	3.03144	4.26889	3.52916	3.09075	2.61102	4.21382	3.96342
ENSG00000158850	3.40003	3.85084	4.39045	2.05341	3.9984	2.52564	4.02662	6.20231	5.56884	5.29814	3.39627	1.23795
ENSG00000158859	0.485397	0.824758	0.13582	0.0371247	0.0439692	0.118763	0.243398	1.09662	0.680777	0.405731	0.359879	0.151208
ENSG00000158864	22.2536	19.7807	20.2924	10.4495	19.5831	19.2466	30.854	34.5863	38.8213	34.3606	11.6417	11.9331
ENSG00000158869	0.264391	0.274023	0.196025	0.0334385	0.38338	1.05354	0.348488	0.535583	0.255286	0.215173	3.2728	2.2907
ENSG00000268387	0	0	0	0	0	0	0	0	0	0.280939	0	0
ENSG00000158874	0	0	0.107348	0	0	0	0	0	0	0	0	0
ENSG00000158882	3.35385	2.31223	1.20262	0.833011	0.945885	1.6628	4.06423	4.86547	5.15289	3.49771	1.29556	2.26241
ENSG00000143257	0.827523	0.95783	0.295161	0.119166	0.285772	0.963933	0.9963	0.673458	0.578699	0.642091	0.601575	0.848232
ENSG00000248485	0	0.02004	0	0	0.108536	0.091907	0.0672756	0.0355781	0.0342118	0	4.31618	2.31717
ENSG00000158887	0.0236882	0.154328	0.0974565	0.0355441	0.155401	0.0352981	0.434042	0.190242	0.0526317	0.288116	6.6603	5.66948
ENSG00000143252	51.7312	45.4393	31.6145	25.9499	29.8193	24.341	42.9729	36.0575	56.0808	58.9974	19.829	15.9287
ENSG00000188931	0.971535	0.467057	0.649498	1.17042	1.09812	0.721558	0.397719	0.779524	1.00144	0.74429	0.912084	1.22936
ENSG00000143226	0.804719	0.261736	0.319269	0.342534	0.19364	0.209706	2.34818	4.76768	3.25312	3.02507	5.48864	1.40691
ENSG00000173110	0.0320668	0.104811	0.0930374	0.156766	0.0581009	0.191258	0.465743	0.642517	0.285602	0.229887	0.689979	0.390509
ENSG00000203747	0.209209	0.0644558	0.107665	0.476832	0.128345	0.335628	0.169555	0.210733	0.140936	0.076215	3.18631	1.88773
ENSG00000162747	0.185109	0.194503	0.144933	0.415872	0.251408	0.14721	0.163586	0.240967	0.438598	0.200413	5.69222	3.98758
ENSG00000072694	0.098673	0.0976755	0.0493847	0.0346048	0.0599386	0.182577	0.452505	0.50067	0.239709	0.69324	2.45889	1.62303
ENSG00000244682	0	0	0	0	0	0	0	0.347803	0.622739	0	1.57855	0.79188
ENSG00000132185	1.40065	3.86709	1.22196	1.45461	4.68758	1.23029	46.8113	46.9937	117.469	51.7084	0.547438	0.436054
ENSG00000162746	0.342995	0.382932	0.213467	0.118367	0.172523	0.34071	0.547321	0.509088	0.29932	0.360221	0.461615	0.152954
ENSG00000081721	6.40923	6.8833	10.806	5.22188	13.3819	7.87741	8.23834	8.63781	6.9914	7.96455	4.53149	2.53914
ENSG00000118217	8.50717	6.89109	18.6573	7.76842	13.5304	6.61732	13.2306	10.9248	11.7073	9.63504	7.14751	7.10136
ENSG00000162745	1.23606	1.7162	0	0.0579612	0.0235242	0.149883	0.283898	0.271863	0.0937755	0.124216	0.580302	0.681987
ENSG00000198929	0.0676987	0.0965775	0.099723	0.110022	0.0735029	0.0654224	0.021301	0.0544779	0.0424333	0.0566196	0.0913043	0.0889909
ENSG00000254706	0	0	0	0	0	0	0	0	0	0	0.163491	0
ENSG00000239887	0	0	0.559465	0.153063	0.100172	0.136362	0.0469905	0.0274343	0.148419	0	0.58022	0.838896
ENSG00000171722	0	0	0.0363923	0	0	0	0.0409255	0.0288104	0	0.0366181	0.101549	0
ENSG00000198574	0.0210369	0	0	0.0315929	0	0.0313545	0	0.012986	0.0233877	0.010323	0.158241	0
ENSG00000152332	21.2087	16.7343	26.9194	14.2353	20.4235	11.622	31.9118	29.7307	27.3372	28.5193	8.53207	7.90729
ENSG00000117143	65.1196	46.0778	81.4892	46.6067	198.673	107.495	20.4246	19.8697	25.7338	18.0754	5.12602	5.36386
ENSG00000162733	73.4999	60.7121	1.36151	0.164068	0.969047	1.77456	19.0201	13.1083	18.8922	15.9692	3.46821	4.11867
ENSG00000132196	12.8064	8.07951	12.9391	10.3507	9.532	11.7819	19.1321	17.2637	16.6275	15.8041	5.43987	4.23185
ENSG00000185860	0.0681045	0.0236513	0.0749517	0	0	0.00269767	0.196499	0	0.0810318	0.0303053	0.0759911	0.129115
ENSG00000117152	6.20511	5.36168	0.051202	0.111669	0.175485	0.0446399	0.131902	0.135876	0.172971	0.253809	0.621898	0.415712
ENSG00000143248	2.08713	0.96977	0.36929	0.56641	0.831294	0.257745	0.331639	0.167006	0.0716552	0.149812	24.8476	21.1314
ENSG00000143228	1.71938	1.52748	0.29501	0.302204	2.86904	6.53465	10.3196	11.8211	7.09055	9.97044	0.725368	1.94301
ENSG00000185630	13.9349	25.3902	2.11412	0.525235	0.513616	0.851917	0.413583	0.961707	1.39073	1.49004	13.2505	12.2381
ENSG00000162761	0.0118465	0.0328868	0.0121396	0	0.0295341	0	0.0136769	0.0337557	0.0314314	0.0136088	0.0297229	0.00780564
ENSG00000143171	0.0843655	0.137566	0.0259504	0.158371	0.0123838	0.0718527	1.64312	2.9075	0.984812	1.50068	0.566942	0.162198
ENSG00000162763	0	0.0417957	0	0	0.0754829	0	0	0	0	0.031474	0	0
ENSG00000143198	59.4674	48.2506	24.5692	16.9114	15.5602	6.29444	45.774	36.1572	51.1875	57.2622	7.36062	12.0584
ENSG00000143149	15.1481	20.1917	9.43366	3.47933	13.937	10.9415	22.6142	28.8002	19.0148	25.1445	16.6218	13.5941
ENSG00000143183	30.2188	25.4265	29.4516	16.5364	16.9323	12.7865	37.5672	28.9247	35.7598	32.1024	13.0889	15.4334
ENSG00000143179	8.07181	10.0611	14.0763	8.67165	23.572	12.8969	14.7017	20.0315	11.0339	13.5393	3.5157	4.09279
ENSG00000267884	0.148837	0.0468488	0.0886549	0.090151	0.0714203	0.0650036	0.0513696	0.146177	0.0692607	0.0707955	0.178027	0.111889
ENSG00000188859	0.0891338	0.0772204	0	0	0.0320098	0	0.323861	0.525381	0.164756	0.293915	0.0801393	0
ENSG00000143157	7.06683	7.98314	5.63005	4.66991	8.26755	6.46122	4.91949	9.50504	6.08719	7.89486	6.31429	4.40202
ENSG00000152382	4.40226	2.89881	4.58566	3.60484	5.74126	2.51249	4.32099	5.17071	3.64983	4.49755	3.71606	5.03422
ENSG00000143195	0.0238714	0.0184035	0.0304222	0.0227176	0.0421973	0.0602256	0.0423273	0.0553959	0.00856283	0.0365617	0.0487274	0.070464
ENSG00000143194	0	0.057814	0	0.0200616	0.0265168	0	0	0	0	0.0524316	0	0.0668988
ENSG00000143167	0.0528742	0.0889154	0.0803471	0	0	0.0337914	0.0493662	0.0640637	0.0336461	0.164673	0.060767	0
ENSG00000198842	0.0291755	0	0.0564026	0.0175794	0.0177188	0	0	0.0180085	0.0325212	0.010219	0.117198	0.0145036
ENSG00000143190	1.8795	1.38347	3.14612	1.16135	1.32609	0.95861	2.45136	2.22775	1.68555	1.80278	2.93019	1.93032
ENSG00000198821	0.0129417	0	0.104856	0.7374	0.0607424	0.040324	0.0590035	0.109531	0.201158	0.0507173	0.364672	0.226345
ENSG00000143162	34.0687	33.5827	117.105	70.3585	17.8349	23.1065	40.5169	16.7513	31.3878	26.9224	34.6209	50.5513
ENSG00000198771	0.156474	0.0909691	0.128664	0.161967	0.144565	0.18328	0.0244123	0.0850533	0.0911452	0.0713026	0.702766	1.62688
ENSG00000197965	54.0784	57.9833	37.8047	18.9145	28.4523	22.4362	9.29734	17.8163	15.6394	15.6619	17.1435	22.7665
ENSG00000143199	0.0338948	0.131363	0.0162042	0.00316049	0.0123336	0	0.120898	0.038147	0.149012	0.066068	0.10092	0.020817
ENSG00000143158	30.2917	28.6608	9.1823	4.84251	11.5993	7.23337	17.4229	14.3707	18.8644	17.3321	6.62974	9.15125
ENSG00000143164	38.9342	27.5994	9.52738	4.97826	10.5158	8.1476	18.0125	17.5941	19.9331	16.3748	10.2763	9.63653
ENSG00000143147	2.89131	2.62596	0.82261	0.197154	0.302759	0.216288	1.8302	3.81507	2.06037	1.96509	0.825883	0.936916
ENSG00000143155	32.9093	26.8638	28.466	21.7526	37.8468	14.9843	33.0183	40.931	46.4135	38.8222	9.13763	9.23439
ENSG00000213064	18.1608	19.7686	14.67	7.43364	4.53658	8.00084	12.3139	40.7025	19.6384	15.6426	17.0376	20.9562
ENSG00000143178	0.339995	0.863779	0.382651	0.42743	0.353298	0.37265	0.342107	0.614159	0.64005	0.312712	0.912636	0.641974
ENSG00000143185	0	0	0	0	0	0	0	0.0558347	0.0480938	0	0.426022	0.394401
ENSG00000143184	0	0	0	0	0	0	0	0.0206509	0.01787	0	0.195911	0.141333
ENSG00000143196	3.92415	9.31392	0	0	0	0	0.026397	0.186434	0.0807179	0.11873	7.2365	11.5829
ENSG00000143153	2.301	4.76687	10.7349	2.19555	6.89698	4.44932	5.05744	4.52233	5.39264	3.60357	9.60436	11.8533
ENSG00000143156	4.44116	6.21424	2.74667	1.82667	5.17454	3.16519	4.51863	4.16433	6.60872	5.48783	3.58341	3.25468
ENSG00000117475	12.7077	13.8609	23.4027	12.6516	24.7349	12.5763	16.3673	18.1776	12.3158	12.8411	6.1434	9.33387
ENSG00000117477	0.185626	0.120959	0.348129	0.348219	0.13619	0	0.335028	0.178223	0.157944	0.726325	0.393551	0.0868744
ENSG00000117479	1.9971	2.51992	17.5915	5.64124	6.81194	5.43851	34.0019	26.8307	21.9023	21.303	3.13897	6.86599
ENSG00000198734	0.00588822	0.00386497	0.0056876	0.00444141	0.0297927	0.0377143	0.0275645	0.0389481	0.0065742	0.0406961	0.0681729	0.0656237
ENSG00000174175	0	0.0288585	0.0428422	0	0.0385532	0	0	0.0126084	0	0	1.20673	1.26322
ENSG00000188404	0.174762	0.125586	0.0676183	0.183931	0.308016	0.312665	0.128509	0.150847	0.243107	0.0171733	0.258	0.217653
ENSG00000007908	0.0117404	0	0.0539797	0	0.0364805	0	0	0.0181169	0.0640155	0.0563906	3.27436	1.65994
ENSG00000171806	2.47108	2.42991	3.56428	1.55825	2.94139	3.82376	2.3808	3.25499	3.34378	2.88197	2.67898	1.37879
ENSG00000000460	1.7692	1.84075	1.04521	1.41523	1.78706	3.88931	6.00048	10.1378	5.04295	6.50053	0.825811	1.27673
ENSG00000000457	4.44943	3.20049	4.71699	2.8472	1.85261	2.28471	2.54107	3.47109	3.10851	2.26362	4.25667	5.30115
ENSG00000075945	11.3262	15.112	11.5771	8.44077	8.34946	5.26243	4.10851	5.07192	6.85197	6.23263	10.1151	11.5347
ENSG00000203740	0	0	0	0	0	0	0.0500078	0	0	0	0	0
ENSG00000120370	4.28013	3.84285	3.20113	1.96198	2.2062	2.41926	1.60483	2.39059	1.3695	1.97904	1.70641	2.58689
ENSG00000116132	142.494	130.939	1.55915	1.90102	1.74107	1.46317	0.990158	2.97056	4.26004	2.07724	17.6255	14.488
ENSG00000117501	0.0575859	0.151255	0.0185713	0	0.022548	0	0.245774	0.10757	0.0222549	0.0943761	0.379177	0.0993602
ENSG00000007933	0.284562	0.132004	0.014052	0.02173	0.0603331	0	0.0316247	0	0.0321839	0	0.0558182	1.20249
ENSG00000117507	0.0127715	0.0332548	0.0618296	0.0191521	0.0149867	0	0	0.0393082	0	0	0	0
ENSG00000094963	0.0419374	0.028513	1.2082	0.208188	0.012797	0.0162294	0.043721	0.0167909	0.00606487	0	1.20253	8.10605
ENSG00000010932	1.67116	1.33671	0.0604108	0	0.0116682	0	0	0	0.203592	0	2.01083	0.998802
ENSG00000076258	2.40945	1.38723	0.330388	0.484688	0.300869	0.28282	1.11615	0.986647	1.41399	1.08073	1.05306	0.591029
ENSG00000117523	7.13484	6.0688	17.9152	6.61034	11.5512	10.2198	4.41621	9.06903	5.29344	5.09784	13.2781	13.2294
ENSG00000034971	0	0.0402994	0	0.0618551	0.0241818	0	0	0	0	0	0.276689	0.256735
ENSG00000117533	20.5077	10.337	9.1235	4.30432	10.2997	4.23093	8.73989	6.76446	12.6264	5.35038	6.00283	6.51791
ENSG00000010165	7.29081	7.47963	7.19422	4.08956	4.38264	3.76333	10.7968	14.3473	12.7591	10.8125	2.5264	3.41799
ENSG00000197959	1.00417	0.76934	0.325868	0.232403	0.263644	0.124896	1.34763	2.51944	2.17868	1.61347	8.06008	4.94467
ENSG00000180999	0.623672	0.284221	0.998815	0	0.655888	0.223555	0.1241	0.257306	0.273284	0.736106	0.949172	0.438978
ENSG00000135845	5.12639	7.06266	5.00518	4.24607	3.83707	3.30369	5.25185	6.77985	7.13982	7.41762	4.844	5.22087
ENSG00000094975	4.38481	4.93844	8.59495	2.57669	3.90816	2.74234	4.62904	6.19333	3.33952	5.44495	5.71255	4.71076
ENSG00000117560	0.0503424	0.0174342	0.0663943	0.035098	0.027455	0.0046665	0.0429631	0.0426153	0.0124582	0.0568488	0.190451	0.32446
ENSG00000120337	0.128408	0.614101	0.0424717	0.0988283	0.154579	0.22891	0.023908	0.0506861	0	0	0.0147493	0
ENSG00000117586	0.158191	0.745454	0.0364174	0.00153703	0.133259	0.0102172	0.105515	0.204569	0.265396	0.141345	0.279319	0.140201
ENSG00000117592	66.0406	73.9571	101.104	51.4348	83.1859	53.2448	44.8267	50.9404	51.4504	50.5362	42.9126	47.7101
ENSG00000162753	0	0	0.0184841	0	0	0.00703319	0.0208148	0.021997	0.00525805	0.0187633	0.0126132	0
ENSG00000183831	0.0758816	0.0788651	0.558711	0.545352	0.106768	0	0.110287	0.0233327	0.0336564	0	0	0
ENSG00000076321	5.98072	4.6457	7.92802	2.92428	4.46804	2.91449	4.23875	3.5693	3.51376	3.58123	4.91149	3.56057
ENSG00000120334	2.74845	3.94909	0.76945	1.12311	1.8804	3.63783	5.15458	7.58725	4.18717	5.29605	1.3421	1.13071
ENSG00000117593	5.48909	6.1258	9.67475	4.82912	12.7699	9.62005	10.8804	14.2546	10.2126	11.3579	3.86135	2.78214
ENSG00000185278	1.7694	0.989551	1.67773	1.79736	1.20416	1.97769	1.87424	2.7228	1.72153	1.47642	1.82813	1.67176
ENSG00000117601	0	0	0	0	0	0	0.0297992	0.0210301	0	0	0	0
ENSG00000135870	8.57605	7.15291	12.1334	4.64394	5.40155	4.78581	5.13654	6.90724	5.24051	4.74187	10.2989	7.88475
ENSG00000152061	9.13296	7.33866	6.09566	4.67979	7.9751	6.96003	6.82259	5.35674	6.20364	5.41782	15.7475	12.3419
ENSG00000203737	0	0	0.0288456	0	0.174585	0.487819	0.129829	0.160247	0.0330229	0.0582645	0.361428	0.782278
ENSG00000116161	19.4263	14.8219	4.98151	4.66607	9.69685	16.7306	25.6272	34.929	27.6329	28.4967	4.72008	5.83606
ENSG00000120333	6.8619	5.09027	3.80383	5.1442	4.71213	3.59425	7.15319	6.14954	9.26097	7.6785	3.40318	3.8904
ENSG00000120332	0.0290974	0.0109066	0.00803267	0	0.0146745	0.0868314	0.00905268	0.00641864	0.00927568	0.0204908	0.0444681	0.0206388
ENSG00000235750	0.526457	0.479502	4.19571	3.4766	10.1061	11.1232	0.172758	0.30895	1.21271	0.285902	3.29913	1.21591
ENSG00000116147	0.193898	0.320987	0.18553	0.274817	0.24209	0.359218	0.100883	0.169384	0.235687	0.122854	0.355544	0.559957
ENSG00000143207	13.0084	12.9288	14.7521	13.8416	16.2643	13.6437	18.8225	15.34	14.6755	12.3233	12.0788	15.2058
ENSG00000116183	0.0669152	0.0428436	0.606998	0.173081	0.283466	0.213889	0.0241382	0.0221681	0.0142619	0.0094491	0.172116	0.102863
ENSG00000152092	0.409101	0.415252	0.0124408	0.0171492	0.0133919	0.0012392	0.0185958	0.0241284	0.00707958	0.0280491	0.106578	0.141555
ENSG00000198797	0.743522	0.167472	0.0501359	0.0533315	0.0153817	0.0275065	0.0704793	0.0324389	0.032072	0.00871574	0.0272689	0.0133517
ENSG00000120341	0.645996	0.731707	0.054465	0	0.0556028	0.085561	0.291697	0.802026	0.26987	0.191821	0.985893	1.06352
ENSG00000075391	5.43018	6.75254	4.54215	2.14285	5.00539	3.79307	4.81991	10.0248	4.94311	4.87726	6.63831	6.70347
ENSG00000240021	0.618668	0.249019	0.490168	0.48735	0.296293	0.414161	0.396726	0.412474	0.102422	0.477273	0.80597	0.594898
ENSG00000213057	1.05579	0.435068	0.165386	5.22385e-07	3.61779e-07	5.01139e-07	0.592309	0.291002	3.7522e-07	2.96349e-07	0.791983	0.312813
ENSG00000184909	0.513267	0.159859	0.0293365	0.0193932	0.0959618	0.303748	0.000104348	0.205626	0.185158	0.218163	0.116891	0.150448
ENSG00000116191	20.0885	19.7642	16.2696	5.91052	5.02412	2.62024	8.08808	9.92522	7.97279	7.45451	15.1875	14.6534
ENSG00000116194	1.13827	1.57807	0.284959	0.0851522	0.12867	0.0562259	0.109489	0.191206	0.120103	0.128627	4.63513	9.26634
ENSG00000116199	13.0058	12.6422	13.3373	5.69478	9.33936	7.7083	14.8589	16.1233	15.7043	14.0835	5.77449	6.27117
ENSG00000186283	6.01048	6.81728	5.02636	4.271	3.41936	5.6477	4.87114	5.27247	3.67415	4.67459	3.3141	1.78432
ENSG00000143322	17.0929	14.3221	20.4493	6.79504	9.16717	8.6951	31.3056	36.8289	17.7587	29.2419	2.25388	1.85154
ENSG00000057252	22.8853	25.4365	14.8374	5.81047	6.36544	8.38359	92.992	69.2467	68.1707	48.1653	2.617	2.15588
ENSG00000162779	0.0156156	0.600071	0.313155	0	0.115983	0.53643	0.500298	0.0415347	0.343854	0.115199	0.259343	0.199273
ENSG00000116218	0.0130078	0	0.0503815	0	0.122102	0.0387581	0.0283524	0.0400316	0	0	0	0
ENSG00000269064	40.8993	29.0446	27.7198	34.872	24.5454	37.3868	16.5281	27.6303	23.5702	23.7427	143.717	103.143
ENSG00000162782	0.0239419	0	0.174052	0.089739	0.0490471	0.142189	0	0.059223	0.132812	0.0587539	0.064957	0.0399474
ENSG00000143340	0.0472017	0.0204729	0.0341033	0.0343125	0.00569399	0.0216698	0.0985346	0.0793921	0.00134869	0.0718964	0.0796868	0.0361556
ENSG00000169905	8.62852	7.2339	12.296	6.03479	6.24213	4.78984	6.24833	8.0423	6.5638	6.01912	4.84509	5.41093
ENSG00000258664	14.9986	11.1054	29.996	10.1779	14.0793	9.83437	17.6517	18.4144	10.1611	18.7865	16.8371	11.7605
ENSG00000143337	10.5996	15.2502	7.91607	2.10312	6.16232	5.47788	4.56581	13.6096	5.49591	9.8012	10.2773	6.40746
ENSG00000135837	14.7845	10.8801	18.2393	7.61866	6.01185	9.20738	14.494	13.6439	9.38817	11.4588	15.6646	17.368
ENSG00000116260	11.5964	7.28333	18.3374	8.31765	10.5978	6.62435	5.4261	9.34315	4.31234	3.46242	3.98283	3.95112
ENSG00000121454	0.40939	0.240638	0.677771	0.307136	0.372795	0.448163	0.314463	0.513079	0.195878	0.119943	0.440524	0.397092
ENSG00000135847	9.20951	8.83821	14.7828	10.0248	19.4193	10.0255	11.1001	10.8135	10.1088	12.8964	5.71053	5.119
ENSG00000143324	5.44344	4.49407	15.0874	4.72423	15.0464	6.04045	8.03294	5.94969	5.88683	5.42921	2.47128	3.12963
ENSG00000135835	0.486382	0.477405	0.100812	0.0654296	0.116045	0.0722522	0.239752	0.441354	0.317627	0.32133	0.123517	0.152962
ENSG00000234237	1.67172	1.45387	3.28793	2.37585	0	0.98044	0.38394	0.256378	1.17813	0.529453	1.30922	2.95219
ENSG00000135823	9.39514	11.1654	12.897	7.35323	11.4441	7.09045	19.8056	17.632	19.6014	15.3088	9.85459	6.14037
ENSG00000153029	6.95634	7.04522	11.0573	5.56153	6.78888	5.99591	3.35089	3.70112	4.86154	3.29604	4.44206	3.87901
ENSG00000162783	5.22174	4.30881	27.7812	16.342	11.0061	7.21403	8.26334	7.4528	9.2741	6.67867	4.23298	2.96304
ENSG00000198216	0.0317091	0.0262085	0.256673	0.397939	0.00473791	0.0657999	0.012931	0.079053	0.0402531	0.0355763	0.0811282	0.0220775
ENSG00000179930	0.0114991	0.045193	0	0.0173228	0.00676228	0	0.0125234	0	0.0256368	0.0122677	0.0153962	0
ENSG00000135821	20.4013	23.9629	5.48598	5.72837	8.05808	14.8518	12.4446	21.2482	27.687	19.2923	22.0813	21.4282
ENSG00000203730	0.031819	0.0527629	0.196452	0.267555	0.156624	0.0854306	0.0691344	0.159689	0.0824774	0.0201409	0.198024	0.17378
ENSG00000121446	0	0	0.0109694	0.017097	0	0.039864	0	0	0	0	0	0
ENSG00000135828	2.34239	2.4845	1.08385	0.429842	0.462747	0.843517	3.10243	2.80215	2.45742	2.13253	2.41299	2.2576
ENSG00000143333	0.140351	0.529751	2.98633	1.3716	2.2675	0.863152	0.215011	0.0744267	0.181406	0.200169	0.988931	0.764753
ENSG00000135824	0.00647813	0.0353826	0.0535076	0.0459197	0	0	0.0300474	0.0680849	0	0.0297699	0.12578	0
ENSG00000135838	1.42905	1.41295	1.90509	0.75947	1.93592	1.6654	12.9398	7.39016	10.1604	10.9185	2.52058	2.3242
ENSG00000135829	51.4769	40.4026	19.9342	14.7103	16.3067	28.6085	65.5431	65.6213	57.4952	56.2552	19.1759	19.5537
ENSG00000157060	0.0125901	0.149324	0.114116	0.0377647	0.0738738	0	0.109765	0.0382958	0.0527966	0.0370139	0	0.0628969
ENSG00000135862	36.5261	65.4843	15.9444	7.88313	13.6167	9.00671	52.1432	45.768	24.2785	36.9636	12.3386	11.5605
ENSG00000058085	5.90077	0.737521	56.4869	56.415	427.103	258.725	0.615067	2.39537	27.5045	2.12442	3.55426	2.7763
ENSG00000157064	0.083953	0.0747889	0.118004	0.0716371	0.41922	0.83235	0.0245112	0.101902	0.126214	0.0187861	0.215877	0.386558
ENSG00000116698	6.65726	6.39542	18.3746	8.02448	15.0659	8.07192	6.72155	12.8434	7.05462	7.99476	8.18462	7.78864
ENSG00000116701	0.80678	0.360784	15.8839	6.49061	5.30251	7.13602	0.453193	0.287705	1.45148	1.68975	1.85141	3.65273
ENSG00000162704	110.882	98.2265	68.1608	45.8583	58.0888	35.8913	73.185	74.9204	69.6091	77.3328	24.0232	30.0858
ENSG00000143344	12.0302	8.39687	0.453885	0.545783	0.183633	0.352837	2.41006	2.21602	2.79512	2.67879	3.84448	3.15834
ENSG00000173627	0.272354	0.115202	0.108458	0.120495	0	0.0392454	0.0581721	0.117328	0.0178362	0.0630054	0.0322333	0.0797684
ENSG00000198756	0.404245	0.38095	0.115253	0.0689506	0.0539406	0.0536926	0.123082	0.143327	0.157542	0.155615	0.458188	0.446674
ENSG00000198860	11.4158	13.6387	19.2834	13.2654	38.5657	17.6839	13.6946	14.7039	13.6026	13.8336	5.04614	5.39525
ENSG00000116667	2.21923	1.71213	3.22516	1.95411	2.7732	2.13245	4.52441	2.81726	4.20798	3.59011	7.2144	6.58694
ENSG00000116406	10.1959	11.7286	16.4874	6.01692	8.11208	4.2664	11.6871	11.9322	6.74808	12.9618	5.72412	6.09504
ENSG00000135842	2.24029	1.78644	17.2141	7.0013	13.388	10.1193	5.25182	2.44008	0.968244	2.5653	4.06284	5.60749
ENSG00000121481	15.7237	11.0442	14.2964	9.32413	8.72946	5.74249	14.0932	12.8268	16.1033	15.0198	6.45188	4.78437
ENSG00000121486	5.54795	4.59414	4.06731	5.42297	4.38385	2.68133	4.7128	6.13143	8.20449	7.18596	3.69954	3.53234
ENSG00000116668	2.5492	2.5604	4.26294	1.98227	0.694926	0.579391	1.93955	1.84278	1.98217	1.36723	2.37256	2.19918
ENSG00000116679	13.251	18.3564	8.05287	6.03569	20.9262	17.9951	60.9334	62.0488	43.3012	46.181	31.6955	34.0011
ENSG00000143341	3.29152	11.745	0.382496	0.107569	0.156428	0.879818	10.8885	1.57194	3.39798	12.2242	1.6836	4.25947
ENSG00000116690	0.277544	0.0742675	0.0558902	0.209047	0.0272022	0.0690004	0.166876	0.0669205	0.0644543	0.0472068	0.15484	0.232339
ENSG00000047410	16.0429	13.002	10.0358	5.39053	9.13431	10.7297	8.1819	7.68236	11.1012	10.8519	14.9111	13.8779
ENSG00000157181	7.22158	6.4476	20.8461	9.52611	15.6802	9.89013	9.18624	8.66074	9.89405	9.2948	6.94785	5.67613
ENSG00000268662	0.379838	0.518017	0	0.555829	1.75264	0.326146	1.35804	6.24979	0	0.119944	0	2.25728
ENSG00000262180	0.104352	0.604241	0.760246	0	0.121922	0.0775585	0.370076	0.399372	0.230015	0.177251	0.544355	0.329068
ENSG00000116703	0.0957876	0.262272	0.133155	0	0.0838455	0.169916	0.0829981	0.0876314	0.0749951	0.0185619	0.436559	0.346755
ENSG00000073756	11.8499	2.90947	116.713	14.2482	126.565	58.2317	1.19795	1.32374	5.72811	2.31421	1.96832	1.02162
ENSG00000116711	14.1248	5.27556	10.6253	2.19143	5.43202	10.1029	10.5318	6.47827	11.5759	6.84096	3.37636	3.24447
ENSG00000162670	0	0.0765844	0.0323106	0.0977375	0	0.0980357	0	0	0	0	0.0903598	0.0850293
ENSG00000150681	0.0597514	0.129975	0	0.0897664	0.210538	0.0593768	0.01085	0.0306845	0.221498	0.0195549	0.508372	0.446893
ENSG00000253148	0	0	0.0233389	0	0	0	0	0	0.0133898	0.0236347	0	0
ENSG00000090104	0.0437752	0.0406565	0	0	0	0	1.11301	0.216563	0.0694129	0.284166	10.5285	5.61546
ENSG00000127074	0	0	0	0	0	0	0.032792	0	0	0	0.548841	0.225841
ENSG00000116741	4.42327	4.13463	13.2895	3.53806	17.7761	15.6091	11.9063	9.08115	21.5797	8.37819	6.29811	8.26869
ENSG00000116750	7.91191	10.3803	33.9587	15.7179	41.4444	23.662	21.0412	31.0817	19.9595	23.5872	15.4704	13.6814
ENSG00000116747	27.0769	24.0872	45.7059	24.4884	28.2999	14.5928	43.9203	41.644	40.1124	41.9311	18.5283	19.5545
ENSG00000023572	6.36971	8.6184	5.50341	2.31776	6.43062	4.24742	11.7708	16.6606	12.1857	9.27124	2.14606	3.28476
ENSG00000134371	9.3648	9.33615	11.6976	6.49677	9.96514	6.49546	9.93231	10.8313	9.50411	8.45872	7.95805	6.86816
ENSG00000162630	0.30218	0.471388	0.302491	0.212986	0.483849	0.863044	0.630225	0.732347	0.472841	0.395524	1.24888	1.15111
ENSG00000162687	0.268324	0.371649	0.00174286	0.0326631	0.0236638	0.0199843	0.012872	0.0330725	0.0298576	0.0116469	2.08111	1.9665
ENSG00000000971	41.3839	21.2601	0.0747041	0.0152721	0.0235864	0.030235	0.918475	0.739955	1.97195	2.3563	33.5349	60.3227
ENSG00000116785	1.662	0.690732	0	0	0.0169097	0	0.0238576	0	0.0477485	0.0211071	1.1466	2.11686
ENSG00000244414	5.9401	2.58726	0.0197082	0	0	0	0.280516	0.161065	0.3145	0.316821	2.24486	4.51943
ENSG00000080910	0.147788	0.098728	0	0	0	0	0	0	0	0	0.252759	0.244424
ENSG00000134365	0	0.01482	0	0	0	0	0	0	0	0.0192929	0	0
ENSG00000134389	0.0602469	0	0.0145632	0	0	0.0224579	0.0164044	0.00193368	0.0167711	0.0222189	0	0
ENSG00000143278	0	0	0.0373187	0	0	0.0287493	0.0420237	0	0	0.0189396	0	0
ENSG00000066279	1.35922	1.92331	0.346257	0.408352	2.87303	6.48448	6.15023	10.0081	6.92182	6.86269	1.88992	3.46641
ENSG00000177888	5.60535	4.31515	12.9043	4.78964	6.77715	3.03247	5.23651	3.95867	4.03824	3.9802	3.86665	4.46267
ENSG00000134376	0.0359737	0.0992246	0.0590343	0.0656182	0.108266	0.0837126	0.115424	0.0327947	0.0158001	0.0610508	0.121431	0.0559109
ENSG00000213047	4.66865	2.75582	12.6079	6.47783	7.24113	7.12189	6.1742	3.94161	4.26044	3.84734	5.55234	6.00961
ENSG00000203724	0.838971	0	0.137296	0	0.644256	0	0.61288	0.315677	0.300827	0.329044	0.1972	0.214366
ENSG00000143355	0.335478	0.814813	0.536505	0.959427	0.322707	0.415393	0.33068	0.644867	0.37684	0.391781	0.795802	0.544893
ENSG00000151414	45.4091	60.4541	28.749	15.276	15.4614	15.3124	18.2183	19.8012	21.7198	18.7442	11.7946	13.2344
ENSG00000151418	0	0.0509594	0	0	0	0	0	0.0889115	0	0	0.097142	0
ENSG00000081237	1.02821	0.386709	0.706533	1.31955	0.995366	1.20066	0.598138	0.905917	1.274	0.4889	7.3271	8.00206
ENSG00000116833	0.54235	0.475129	0.215018	0.196617	0.208522	0.188857	0.151759	0.337579	0.129472	0.222548	1.77307	1.00057
ENSG00000162702	9.84315	8.32126	9.4218	4.77854	6.24887	4.06369	3.84305	5.05228	4.67653	3.88882	1.85585	1.63589
ENSG00000118193	0.575168	1.07744	0.286346	0.612256	3.11383	7.3858	3.75185	4.88022	3.91625	4.58952	0.682109	0.735138
ENSG00000118197	5.80578	5.13878	13.0275	5.61563	9.98687	6.65567	5.1334	8.11729	4.26713	5.82275	7.92572	7.00155
ENSG00000118200	16.3985	13.055	44.1432	13.7299	54.1961	30.4778	13.0506	11.9395	13.1466	11.3592	10.7001	13.3496
ENSG00000170128	0.0363601	0	0	0.0543353	0	0.0270609	0	0	0	0.0354902	0	0
ENSG00000163362	0.172732	0.113013	3.98863	1.73151	0.944712	2.06461	0.155493	0.175569	0.24119	0.358606	3.67904	3.3416
ENSG00000116852	0.0231359	0.0136845	0.104822	0.12223	0.288183	0.397247	0.0362725	0.0774375	0.0395446	0.0304201	0.0928557	0.0722652
ENSG00000081248	0.006922	0	0.00668701	0.0104431	0.00814732	0.0206592	0.0150741	0.0213835	0.00772611	0.00682781	0.0555083	0
ENSG00000232237	0.021201	0	0	0	0.0248961	0.0824968	0	0.0424644	0.0235691	0.0104029	0	0
ENSG00000116857	14.6167	12.3595	11.8895	10.2079	4.71671	9.4605	20.8513	15.8034	30.3243	19.4553	4.86296	4.94193
ENSG00000163395	0	0	0.0907204	0.580836	0.177745	0.174285	0.00385666	0.0191898	0.0118845	0.0230685	0.0473245	0
ENSG00000081277	0.517906	0.570307	50.0299	28.4103	15.3958	23.4484	0.997303	2.11542	3.83021	2.41095	36.8166	47.753
ENSG00000118194	1.18251	0.222347	0.160982	0.129566	0.690895	0.263809	0.483668	0.42598	0.41934	0.578635	0.992593	0.406333
ENSG00000159166	1.34511	0.152247	15.3957	15.6735	14.4985	16.6827	0.238697	0.386907	4.19248	0.820921	12.9512	15.3081
ENSG00000159173	0.0386605	0.048399	0.117925	0.0247153	0.0528109	0.158812	0.0694919	0.0806726	0.0761532	0.104845	0.315745	0.207133
ENSG00000174307	9.56316	8.0913	19.6086	12.7161	12.8012	5.59141	3.28264	4.86245	4.67133	4.38056	0.90784	0.678241
ENSG00000159176	18.9729	21.7452	51.1358	34.0974	41.9022	18.5495	36.8925	43.1481	39.5104	39.4092	11.2905	5.8012
ENSG00000269690	0.980915	0.752975	0.254504	0	0.0762416	0	0.796854	3.02238	0.645715	0.375813	0.447337	0.497351
ENSG00000134369	0.985872	1.30246	0.634229	0.303008	0.591579	0.830664	1.04708	4.4261	1.15796	1.04289	1.87497	1.63119
ENSG00000198700	14.4901	20.8212	11.0912	6.8391	10.1396	11.4863	21.8823	29.1113	21.2247	18.6699	3.65864	5.28355
ENSG00000198892	3.90168	3.80268	1.43589	0.246287	0.3859	0.212438	5.58772	2.78276	4.58472	3.53949	0.133385	0.365256
ENSG00000163431	5.95778	6.08076	0.0713387	0	0.049616	0.0157306	0.0287087	0.10579	0.199881	0.0207755	3.64823	2.05008
ENSG00000134375	27.6888	22.8437	25.9042	13.663	18.7977	10.4995	39.2817	42.0842	39.0514	38.6947	4.85156	6.0666
ENSG00000176393	5.32163	4.80832	12.1961	9.20666	9.55513	11.3449	11.1471	8.11184	5.42725	7.12919	3.52994	4.7185
ENSG00000163435	0.192184	0.110723	12.969	11.9424	0.502059	0.992542	0.248666	0.333097	0.296262	0.276867	1.71186	1.35209
ENSG00000170075	0.0871204	0.0818658	0.0519008	0.0922273	0.0470014	0.1055	0.107777	0.111562	0.0630851	0.0580072	0.173982	0.0769673
ENSG00000143862	5.87392	8.43775	6.99413	5.81472	7.05005	4.37324	6.66389	6.386	5.93516	8.65735	3.7492	2.30389
ENSG00000143851	0.0301708	0.0309535	0.0597508	0.0167761	0.0761474	0	0.081751	0.113057	0.127318	0.0148412	0.581286	0.300477
ENSG00000133067	0.0246896	0	0.0165423	0	0.0200964	0.0878525	0.590276	0.0190469	0	0.0729195	1.15736	0.277985
ENSG00000077152	7.51329	8.46029	4.44535	0.518247	4.12919	12.8722	33.3333	57.3144	37.4338	35.8576	2.36758	2.25743
ENSG00000077157	2.19251	2.05726	2.40797	1.32692	1.52196	0.977041	1.28446	1.50856	1.8753	1.57908	7.34921	6.89802
ENSG00000143858	0.0572452	0.0950705	0.0583674	0.0508887	0.0233859	0.080857	0.0449207	0.0533761	0.0484593	0.0676005	0.199071	0.130802
ENSG00000117139	11.5282	10.7909	21.0455	9.33176	13.3717	8.35591	8.67951	10.1981	9.96989	8.34576	15.2331	14.5902
ENSG00000184774	0.078707	0.0558366	0.0719365	0.0413879	0.017018	0.229359	0.121988	0.0825139	0.0821904	0.03973	0.0957771	0.150245
ENSG00000183155	3.30804	3.76675	5.77143	4.49716	2.40557	2.04548	5.92007	5.28218	5.1433	5.68689	2.03155	1.95119
ENSG00000117153	9.42494	9.63795	10.2224	8.60991	15.6875	8.71324	9.89675	12.0333	10.1176	9.59632	4.34665	4.48762
ENSG00000159346	23.319	21.5082	77.076	34.4363	40.1443	35.4839	49.0517	40.1	52.4403	42.0842	13.3348	20.231
ENSG00000159348	7.94699	7.23171	65.8816	22.2049	29.3809	22.9218	16.9323	12.135	16.2054	13.5021	12.1538	11.3293
ENSG00000163444	16.5954	13.1941	17.3561	7.77073	12.1869	9.86024	17.2711	13.4671	16.2111	14.2038	6.44354	7.38313
ENSG00000143847	0.242004	0.213093	0.0665586	0.0248868	0.0390832	0.0395534	0.0689008	0.264041	0.163981	0.0325407	0.240526	0.336096
ENSG00000122180	0.0159862	0.0392594	0.0212433	0.00612231	0.00386287	0.00266309	0	0.0271443	0.0352733	0.0793321	0.00226843	0.00548787
ENSG00000163485	0.212174	0.413941	0.0186416	0	0.0171613	0.0287221	0	0.0628367	0.0487759	0	0.051755	0.0306826
ENSG00000133055	0.0359293	0	0.0115938	0	0	0	0	0	0	0	0	0
ENSG00000133048	9.59603	9.89436	0.0966543	0.296954	0.116456	0.0359657	0	0.315817	0.695265	0.145184	3.78392	4.02291
ENSG00000133063	0	0.0354733	0	0	0.0319884	0	0.0207273	0.0293155	0	0.0178012	0	0
ENSG00000159388	1.76595	1.1444	16.937	6.92398	13.4945	4.63273	0.462061	1.22894	1.44426	1.29853	24.043	9.9877
ENSG00000122176	6.85942	8.11561	0.0245828	0.172313	0.119607	0.113783	0.0553909	0.156926	0.155851	0.150184	3.34671	3.2774
ENSG00000188783	0.6716	0.942211	0.505256	0.383959	0.722869	0.648727	0.545497	0.692603	0.734395	0.479967	1.36863	1.1435
ENSG00000188770	0.064908	0	0.0943557	0	0.0206994	0	0	0	0	0	0	0
ENSG00000058668	33.3971	39.8327	75.3904	31.4209	14.9249	14.5901	16.9326	14.9748	17.1929	15.3383	29.973	26.8363
ENSG00000122188	0.225858	0.10661	0.0830461	0.0927418	0.197913	0.0861448	0.0902521	0.153338	0.0552944	0.0552015	0.446907	0.23857
ENSG00000058673	38.1723	36.8187	38.8233	18.1303	27.1779	22.7717	31.1545	26.7227	28.4765	28.8595	25.8979	24.1526
ENSG00000257315	18.6704	18.0364	19.3091	11.3378	12.8012	11.6985	11.7398	11.08	10.7072	11.852	14.9905	15.6479
ENSG00000182004	47.6452	47.9734	50.977	29.5949	67.6525	35.0017	65.8997	73.4136	59.8996	86.8552	14.5899	18.5835
ENSG00000143842	0.680378	0.602348	0.956876	0.934168	0.489771	0.469247	1.99407	4.6868	1.6933	2.0592	1.87927	1.16633
ENSG00000143845	3.03142	1.66717	10.4127	5.46204	7.59274	1.22022	6.86902	2.77152	4.8315	5.86303	1.6799	0.87514
ENSG00000143839	0.106151	0.097863	0.0587634	0.0454056	0	0	0.115711	0.0349697	0.0168106	0.0444976	0	0.0569218
ENSG00000170498	0.0672269	0.12891	0	0	0	0.0998032	0	0	0	0	0	0
ENSG00000174567	0	0	4.31361	0.310688	1.15973	0.621259	0	0	0.172729	0.0507068	0	0.0658996
ENSG00000143850	0.200148	0.167456	0.526954	0.488386	0.44066	0.515893	0.035957	0.405296	0.123329	0.0996243	0.537924	0.282467
ENSG00000158615	7.64363	9.23239	33.4754	13.2157	13.5752	10.5127	9.33606	12.0432	8.07927	9.26311	9.70482	10.0819
ENSG00000133056	0.39292	0.188346	2.34493	1.13738	0.300828	0.746151	2.0599	1.80347	1.68749	1.04017	6.55982	5.72563
ENSG00000198625	7.53	8.40225	18.1324	8.84865	11.7688	6.95478	9.40918	12.9884	6.63515	6.40659	10.6063	11.4194
ENSG00000170382	0.0640695	0.140362	0.125758	0.1017	0.0642433	0.110167	0.0332466	0.0707498	0.139848	0.0609961	0.116867	0.124354
ENSG00000163531	4.26223	2.51599	0.0850319	0.400782	0.240937	0.928943	0.096223	0.207895	0.288882	0.070468	1.54077	1.50922
ENSG00000184144	0.0126835	0.0255508	0.0294005	0.00765879	0.0119466	0	0.0469507	0.0274368	0.0538244	0.0200308	0.0745313	0.0482241
ENSG00000174529	0.697882	0.205933	1.62909	1.18688	0.780918	0.708551	0.622461	0.902015	0.949355	0.52724	0.556605	0.595703
ENSG00000117222	7.49375	5.38409	9.16042	5.30882	4.56502	3.49871	6.73201	7.92388	7.7794	6.78735	4.69232	4.29273
ENSG00000133059	5.75621	5.12152	5.82658	2.89116	3.24427	1.75078	14.8632	7.94106	9.92876	8.71176	3.50423	4.05711
ENSG00000133069	0.296875	0.33081	0.260667	0.537609	0.334654	0.232657	0.98955	1.29105	1.26308	0.784126	0.304241	0.404945
ENSG00000163545	0.976349	0.580729	1.27518	0.385599	0.655844	1.33672	0.18	0.114319	0.134471	0.121169	1.77695	1.72356
ENSG00000162873	0	0.012879	0.00954685	0.0399411	0	0.091496	0.096149	0.0668596	0.0964429	0	0.0530169	0.31713
ENSG00000186007	0	0	0.248479	0.719513	1.3223	0.103184	0	0.0911906	1.19237	0	0	0
ENSG00000117266	0.0791575	0.155635	0.0386753	0.0202061	0.152078	0.225197	0.293649	0.509881	0.119626	0.293043	0.369004	0.322011
ENSG00000174514	0.108963	0.0931901	0.14829	0.115392	0.20432	0.0653448	0.200702	0.273997	0.123227	0.0916594	1.08773	0.485855
ENSG00000158711	5.96254	4.07918	6.85697	2.76124	6.80726	4.29586	3.36497	5.41812	3.15736	3.32068	7.56164	7.57784
ENSG00000158715	0.195187	0.0824447	0.243472	0.0568903	0.0962528	0.0751297	0.459456	0.815996	0.378895	0.316101	0.219281	0.109588
ENSG00000069275	24.7698	27.641	17.191	7.1051	21.6391	17.5488	30.6061	34.2788	26.4292	31.1424	22.389	17.5819
ENSG00000268313	33.6833	36.9538	17.8958	10.2652	29.5742	22.9179	40.5998	41.9446	36.0046	41.7764	39.3134	30.7395
ENSG00000117280	7.26076	4.40142	2.9317	1.18244	2.2014	2.35966	7.5028	8.60001	9.52976	4.82028	1.35233	1.43621
ENSG00000133065	2.19554	2.20441	2.44743	0.653378	1.43152	1.45562	2.62816	3.29372	2.3799	2.07656	1.68246	1.27215
ENSG00000162877	0.139284	0.00199768	0.027151	0	0.186963	0.444892	0	0.0613093	0.0474177	0.0347139	0.0534602	0.0764758
ENSG00000174502	0.00925248	0.01139	0.0562166	0.0699469	0	0.0828288	0.0283671	0.0134076	0.0206415	0.000658456	0.197429	0.494039
ENSG00000196550	0.537687	0.556789	0.215064	0.378389	2.25969	2.76809	1.65828	3.89112	1.51441	2.29568	0.774387	0.983847
ENSG00000198049	0.043063	0	0.00123228	0.0574204	0.0448854	0.0303791	0.0116318	0.0323814	0.00354198	0.00875623	0.00679818	0.0793615
ENSG00000196533	0.563299	1.78625	0.233763	0.858918	0.757404	1.25201	1.32547	0.607071	1.75535	1.3325	1.49668	0.510837
ENSG00000196188	0.0495458	0.0404135	0.00204792	0.00766756	0.0997236	0.146272	0.129119	0.258877	0.232254	0.254462	0.1958	0.178843
ENSG00000163486	4.03517	6.23294	3.01918	1.40028	1.39427	2.7991	9.9973	18.4191	10.9946	14.3113	12.1674	9.034
ENSG00000143466	2.75826	2.28629	0.314337	0.540057	0.301447	0.48983	1.41678	1.71868	1.4375	1.14626	2.51898	2.19378
ENSG00000162888	0.102283	0.373698	0.108871	0	0.0480493	0.0609823	0.0445767	0.414911	0.0568657	0.0502017	0.907072	0.255049
ENSG00000136653	0.181061	0.197614	2.29785	1.766	0.972408	1.77899	0.0788758	0.083814	0.301373	0.165653	4.42745	5.42414
ENSG00000143486	18.6667	14.5353	15.1777	13.6704	18.3572	15.2217	12.4383	10.9235	16.9311	10.9348	7.71619	5.52184
ENSG00000143479	9.01595	5.8452	10.5522	7.82151	8.14121	2.72888	7.84804	8.08808	4.86439	6.42333	1.70152	1.13031
ENSG00000162889	19.0175	13.591	14.329	7.40756	9.18711	7.52601	8.66612	11.2664	9.97382	8.42922	4.84144	4.72841
ENSG00000136634	0.0228467	0.0262955	0.13165	0.0153604	0.104369	0.113379	0.0562666	0.126799	0.0198285	0.106356	0.113646	0.0577073
ENSG00000142224	0.00425067	0.154664	0.0480408	0.0496007	0.0236189	0.157564	0.0360373	0.10748	0.182843	0.0786002	0.300968	0
ENSG00000162891	0	0	0.288962	1.18247	1.25758	0.571	0.0631082	0.0875924	0.375193	0.109475	0	0
ENSG00000162892	0.688979	0.526228	0.074102	0.11477	1.76728	0.401273	1.52812	1.55841	12.6725	5.28546	0.132796	0
ENSG00000162894	0.390013	0.504986	0.471994	0.776877	1.16368	0.634681	2.83215	4.30129	2.01613	2.85849	0.51439	0.437184
ENSG00000162896	0.05097	0.0751997	0.0631614	0.0532692	0.0422813	0.172329	0.0739634	0.0985401	0.0378321	0.0254412	0.0858567	0.177226
ENSG00000162897	0	0	0	0	0	0.0504036	0.0247487	0	0.0252384	0.0330744	0	0
ENSG00000182795	0.297946	0.246244	51.3867	13.4707	9.71095	14.1092	0.40766	0.334348	0.700396	1.35601	6.40699	8.24696
ENSG00000180667	2.05292	1.49026	22.0153	15.6226	4.16901	5.26521	1.19111	2.89498	1.33897	2.16604	4.25154	12.2255
ENSG00000123836	2.88774	2.48257	31.3203	13.8331	8.94789	7.31534	6.97361	6.14906	6.1332	4.16304	3.55584	5.24233
ENSG00000123843	0.422696	0.134882	0.235429	0.20995	0.421922	0.513682	0.227441	0.392593	0.374221	0.266967	0.562499	0.78243
ENSG00000123838	0	0	0.0184322	0	0.02238	0	0	0	0	0	0.0929893	0.1329
ENSG00000196352	27.2011	29.7054	41.4979	20.8085	37.8881	19.2735	14.2009	15.7553	20.4639	11.5608	18.3818	18.883
ENSG00000117322	0	0.0285568	0	0.0492545	0	0.0162536	0	0.0252257	0	0.0107321	0.0875171	0.0541537
ENSG00000203710	0.04437	0.169813	0.0586711	0.114312	0.100095	0.096912	0.0845983	0.0981943	0.0621111	0.101784	0.196935	0.0726872
ENSG00000197721	0	0.0420237	0	0	0	0.0360509	0.0571255	0.0186213	0.00537485	0	0.00651156	0
ENSG00000117335	57.8944	39.8961	57.2058	30.3748	53.0568	37.9073	49.8867	34.9113	48.1142	37.8721	43.9092	32.4342
ENSG00000203709	0.0846738	0	0.165158	0	0.295233	0.125515	0	0	0	0	0.934033	0.486456
ENSG00000174059	0.60938	0.35162	0.0323904	0	0.133527	0.0548578	0.328347	0.112192	0.143771	0.348589	10.8291	8.07498
ENSG00000076356	0.0924017	0.112512	1.19769	0.71055	1.18573	1.46981	0.0489338	0.124925	0.126129	0.0739834	1.19924	1.19194
ENSG00000008118	0.288644	0.0747184	0.101253	0.0524619	0.102496	0.364152	0.0190055	0.0851547	0.0388306	0.0514322	0.11707	0.108639
ENSG00000196878	4.75157	0.883212	52.2396	31.196	104.152	92.2443	0.685866	1.44194	5.32805	2.02931	6.90132	7.24042
ENSG00000123689	12.0697	4.73916	3.06124	8.65149	95.8656	34.8471	0.11656	0.163475	1.94169	0.207257	0.145425	0.539164
ENSG00000117594	8.45167	5.08463	0.244643	0.334039	0.217674	0.511402	0.216644	0.210352	0.563009	0.0855503	2.19867	1.12632
ENSG00000009790	0.414475	0.397476	2.68911	0.51282	2.23256	2.05479	0.38468	0.63736	1.60638	0.192119	2.14261	2.63355
ENSG00000162757	0.691876	0.899912	20.071	1.53449	5.38901	3.38044	1.77965	2.75649	4.00771	2.66901	2.90888	3.07902
ENSG00000117595	1.36619	0.850759	204.268	63.002	89.8078	56.0116	2.39667	1.98374	11.6963	5.72073	26.8931	24.1685
ENSG00000117597	6.23841	4.51345	2.62552	2.099	2.62017	2.53841	2.80865	4.01171	2.86374	2.9059	2.48439	1.85829
ENSG00000143469	10.1928	6.1512	2.8977	0.697081	0.294946	0.17149	14.1903	6.12248	6.97747	8.52711	0.214474	0.195244
ENSG00000082497	0.388164	0.614926	0.18983	0.0866657	0.0787693	0.156949	0.132849	0.143819	0.180225	0.219417	2.91708	2.01343
ENSG00000054392	1.45198	0.873231	0.855442	0.2532	0.596617	1.06074	5.16013	5.06559	1.42782	3.82969	1.52067	0.952902
ENSG00000143473	0.190345	1.0143	0.166312	0.103328	0.0319707	0	2.81016	3.92813	0.222287	1.59806	0.0458259	0.0342293
ENSG00000117625	6.95629	13.0469	8.07583	7.8019	6.0239	3.41318	8.07796	12.5196	6.92252	6.61531	9.71566	11.9745
ENSG00000082512	4.59913	5.43413	0.650351	0.526411	0.540862	0.440864	3.27303	4.23233	2.60135	3.48336	2.50973	2.92824
ENSG00000198570	0.0343474	0.0641895	0.0690322	0.0814936	0.0402456	0.140346	0.0637365	0.0606491	0.0348562	0.0524526	0.159787	0.0446561
ENSG00000170385	12.1477	8.67497	25.8308	14.9505	9.06193	8.26645	8.56054	10.0789	5.10623	7.03549	11.3863	11.5817
ENSG00000117650	1.21095	1.12197	0.349725	1.06366	3.44412	4.285	5.24956	10.3902	6.09396	7.85575	1.40885	1.64266
ENSG00000123684	7.9247	7.71024	8.41404	6.02019	8.04001	5.85002	11.8957	9.76277	9.00354	9.42391	3.60494	3.46893
ENSG00000143493	4.90662	5.46741	9.30287	6.23647	10.1925	9.15181	8.23559	12.2914	8.2069	8.54476	4.11903	6.17641
ENSG00000143476	0.941172	2.49999	0.146203	0.206296	1.03736	2.56968	5.59258	16.1779	3.50118	8.68374	1.18366	1.11387
ENSG00000066027	15.1426	9.02232	12.69	7.01077	11.484	6.33424	12.8079	11.8413	13.2771	9.22503	9.7331	11.5394
ENSG00000065600	2.25222	1.8004	8.06492	2.42622	4.90597	2.9632	7.76076	5.10929	5.08667	6.1046	0.693688	1.36616
ENSG00000117691	33.1785	25.4569	12.6943	11.4594	17.5176	15.9252	30.2323	20.444	27.9448	20.3689	10.2304	10.2487
ENSG00000162772	2.28537	2.60104	66.9539	40.6728	42.2613	9.80687	1.27491	1.30155	1.93312	2.73541	20.3775	9.7455
ENSG00000162771	0	0.0238903	0.0353897	0	0	0	0.0199272	0.0187926	0	0	0.098226	0.113936
ENSG00000123685	2.13756	0.619418	0	0	0.113215	0.212262	0.202772	1.2285	0.641192	0.451947	0.0630914	0.116983
ENSG00000117697	6.13286	6.6222	7.35273	3.13901	4.46834	3.36985	8.90412	11.3821	8.58543	10.7309	4.52512	4.79872
ENSG00000203705	4.67783	7.14522	3.52259	3.36984	8.1502	6.01945	7.72492	5.43767	6.67239	6.79469	2.57723	2.58702
ENSG00000185523	1.11139	0	0	0.443691	0.23423	0	0	0	0	0.0963974	0	0
ENSG00000162769	1.11032	1.091	1.61081	0.536637	1.77676	0.893091	4.34335	7.98259	3.95426	5.46151	1.07431	1.32881
ENSG00000143494	0.129379	0.165615	0.119695	0.0552629	0.0255492	0.0597861	0.0921901	0.328968	0.169079	0.124207	0.511724	0.314847
ENSG00000174606	7.19242	6.52128	9.87989	3.58879	6.57935	4.05683	5.31538	8.6457	5.38778	7.88222	6.32258	5.2131
ENSG00000136643	11.9199	9.0163	7.67087	4.90236	3.77981	2.90975	15.5892	10.6519	12.0244	8.68692	3.82823	4.3749
ENSG00000117707	0.325128	0.392823	0.218706	0.19893	0.106857	0.188351	0.150301	0.214787	0.203949	0.195629	1.44714	1.51417
ENSG00000143499	14.2335	10.7191	11.0852	5.45753	23.399	17.982	22.7083	28.529	19.5189	19.8462	7.12483	5.91693
ENSG00000152104	5.64749	6.62105	8.83457	5.10531	9.91406	6.12426	3.26076	5.88999	2.71519	3.549	6.77233	6.26252
ENSG00000117724	1.44742	2.8991	0.416826	0.555246	2.57589	6.47244	9.34733	10.2774	9.94951	16.6102	1.8015	3.06346
ENSG00000082482	17.4374	21.8463	0.0777018	0.140015	0.0660847	0.00603357	3.59317	2.15773	2.29791	1.427	0.378481	0.265914
ENSG00000136636	19.4244	17.1449	6.74748	7.65698	9.86202	8.28182	26.3188	30.1703	22.8488	31.2083	10.5832	12.1533
ENSG00000042781	0.130427	0.0716169	0.0408838	0.0393745	0.0649677	0.025934	0.692778	0.853415	0.429862	0.554176	0.0812221	0.118338
ENSG00000196482	0.0908026	0.12749	0.0462725	0.249901	0.052232	0.0266156	0.0615847	0.0768253	0.0357239	0.159899	0.107062	0.159424
ENSG00000092978	4.35119	3.36274	8.9873	3.96934	6.23011	4.66575	5.98044	5.31264	4.67716	4.38724	4.27604	4.16117
ENSG00000162814	0.293341	0.0889586	0.195623	0.155647	0.172811	0.177215	0.0894339	0.127984	0.0618214	0.19593	0.133922	0.141103
ENSG00000067533	2.17358	1.79525	2.35626	0.851714	3.04301	2.20492	2.1983	2.6469	2.12134	2.29222	2.05839	1.44297
ENSG00000092969	0.234293	0.308417	0.693469	0.162631	1.77483	0.500072	0.983378	0.402989	0.19385	0.605464	0.868478	1.2754
ENSG00000228208	0.0315441	0.0685	0.0943008	0.122643	0.0324937	0.0488285	0.141306	0.0647076	0.0776978	0.128961	0.0816198	0.115331
ENSG00000143353	2.97531	2.60537	7.0337	2.65906	6.19058	1.80199	4.15069	6.17246	3.281	5.34788	2.98835	4.4477
ENSG00000196660	0	0	0	0.0762317	0.0132074	0	0.0122582	0	0	0.194607	0.0302563	0
ENSG00000136628	18.5498	27.0026	49.9933	27.7061	57.1261	34.3453	16.1293	18.5785	18.6368	18.0946	12.2267	11.7909
ENSG00000162813	12.9446	12.2864	9.53017	5.73275	6.76317	6.9373	19.9138	14.3907	17.4045	21.2983	6.73869	6.70978
ENSG00000067704	10.6297	8.90155	20.7591	9.78762	12.928	11.8452	18.3701	17.9954	16.4196	13.9592	10.8919	12.9363
ENSG00000118873	16.9301	13.5006	13.2235	10.2569	17.695	12.0257	11.3401	10.6209	12.1023	9.91361	6.64544	7.586
ENSG00000224867	1.35796	0.892853	0.309936	0.185892	0.387895	0	0	0.499882	0	0.0409183	0.328352	1.36008
ENSG00000116141	1.04955	0.79319	2.46374	1.27463	4.14776	2.90759	0.312442	1.13775	0.473086	0.955352	2.21852	2.01045
ENSG00000162817	0.819203	0.282315	0.333436	0.185527	0.177462	0.192931	0.0681153	0.593968	0.171613	0.114294	1.30453	0.811609
ENSG00000117791	0.937497	1.91411	0.336137	0.669459	0.701614	0.674119	1.76671	2.14391	1.67202	2.33199	1.35037	0.881436
ENSG00000186205	0.0984123	0.192512	0.357367	0.173724	1.01446	0.617462	0.642658	1.45043	0.797246	1.013	0.994073	0.523418
ENSG00000136630	0.201021	0.0861601	0.0295061	0.0526541	0.0758401	0.00561244	0.11213	0.201047	0.101458	0.0539086	0.47595	0.243774
ENSG00000143507	1.14316	3.57342	14.0716	1.19692	1.98838	0.47258	3.27294	4.72313	4.29492	5.68029	0.37136	1.0769
ENSG00000143512	0.0824689	0.0862386	0.0319048	0	0	0	0.0179673	0.0381414	0	0.108091	0.110637	0
ENSG00000143498	4.13717	3.75803	4.08309	4.01117	10.3545	5.3678	1.37671	3.48196	1.21127	1.8042	1.79422	1.25057
ENSG00000154305	9.34349	13.0718	13.9736	7.79185	12.9448	7.8165	7.04387	11.2302	5.95748	6.26136	7.43104	8.68124
ENSG00000186063	49.055	42.1162	20.4179	12.3624	26.1138	15.0544	33.7047	36.2924	27.1909	28.0468	13.1487	14.1949
ENSG00000162819	4.25113	4.4104	7.80165	4.25989	3.2984	3.0721	2.50098	4.36237	2.08061	2.82748	6.50815	8.35196
ENSG00000197520	14.0044	8.61059	0.828072	1.08194	0.6267	0.570371	0.622271	1.77427	1.22759	0.484986	0.235456	0.315431
ENSG00000154309	2.32352	2.4933	2.697	2.06784	2.61877	1.55098	6.1696	4.40123	6.39284	4.04412	5.02742	4.52719
ENSG00000187554	0.113386	0.236277	0.366572	0.684018	0.247814	0.215224	0.068764	0.0874323	0.134711	0.0552952	1.78697	1.70606
ENSG00000143502	0.216903	0.109891	0.168228	0.213105	0.0492165	0.375539	0	0.0209747	0.0472561	0.0411889	7.03991	4.59103
ENSG00000178395	0	0	0	0	0	0	0.022266	0.0078702	0.0259698	0	0	0
ENSG00000203697	0.130417	0.107703	0.652741	1.71419	1.95319	1.5234	0.138315	0.338274	0.223883	0.513609	0.0954795	0.0856481
ENSG00000162909	53.7822	43.8997	62.0408	38.5226	101.06	55.5425	36.0709	45.2758	37.6165	32.8842	14.8517	16.596
ENSG00000143514	9.37106	7.14411	7.82111	4.83651	3.90741	4.80699	9.03677	12.2947	7.11513	10.9403	4.96695	4.46055
ENSG00000269358	9.4846	9.66814	8.91182	7.99361	10.7075	12.6462	9.58992	4.91841	7.83801	4.29439	7.51231	26.7481
ENSG00000143756	13.0435	10.884	33.7095	12.5304	21.4013	9.42618	10.3451	14.3879	11.6479	10.9057	10.5722	14.046
ENSG00000143753	49.3492	44.4889	31.767	16.7439	19.6324	15.9972	46.57	33.8677	36.0658	43.4385	101.863	81.7303
ENSG00000143748	8.76857	5.634	10.8167	7.95559	14.7368	8.91594	8.42324	9.8701	8.18134	9.46543	6.12693	7.26284
ENSG00000143771	10.4417	11.5239	17.1895	9.54194	18.0257	9.16053	17.3501	15.8983	14.8654	12.8776	6.9495	8.58732
ENSG00000162923	15.9912	13.3407	23.4382	16.2086	10.6302	10.415	9.74716	18.011	12.4919	9.76122	20.5324	25.4421
ENSG00000143786	4.11878	2.91126	0.0321261	0.00624436	0	0	0.0904587	0.716886	0.203355	0.432618	0.111408	0.165419
ENSG00000185842	3.26111	2.54832	1.74011	2.49476	4.75411	4.86666	4.04996	4.13365	2.75286	6.195	0.728152	0.453808
ENSG00000143815	4.2327	4.45611	5.04437	2.02415	5.29043	5.22096	6.07608	10.0973	4.80546	6.19414	6.06416	6.18823
ENSG00000203691	0.186025	0.207495	0.257342	0.159354	0.34297	0.15836	0.231705	0.439545	0.0884964	0.234267	0.322157	0.763768
ENSG00000154380	18.9815	23.652	9.0688	6.01111	14.6096	6.89379	10.5949	13.5627	12.1395	9.62198	4.69636	5.04935
ENSG00000143742	61.3041	59.7756	73.0529	45.6274	86.2661	57.8829	90.9589	88.3934	77.9753	91.3972	43.0512	43.3282
ENSG00000143819	2.0684	2.73229	1.1034	0.842014	0.415365	0.638269	6.6411	9.76559	6.61596	2.65021	4.42819	3.33762
ENSG00000196187	1.46507	2.42244	1.78561	0.934698	1.38862	3.6156	2.52	3.99615	1.09268	1.95666	5.4543	3.00828
ENSG00000243709	0	0	0	0	0	0	0	6.12169e-09	1.32701e-08	0	0	0.100348
ENSG00000255835	0.0375147	0.0228961	8.14654e-09	9.68246e-09	1.399e-08	2.94455e-08	0.0201871	0.0662478	0.235976	0.0175171	8.73095e-10	8.2279e-09
ENSG00000143811	5.49037	4.79654	2.26483	2.27408	6.70591	6.52935	7.36665	8.87577	8.09259	4.89415	2.69959	2.76135
ENSG00000143768	0.0205699	0.0586241	0.0229851	0	0	0	0.0494582	0.0169825	0.019822	0.0201911	0.00681858	0.107604
ENSG00000143751	6.27741	7.22788	18.3133	8.04755	10.8285	5.92552	8.08228	7.95413	7.62737	6.53953	4.1273	5.87318
ENSG00000163041	44.3347	43.9558	41.5213	43.9975	50.1049	41.501	57.6389	57.8637	64.0822	77.4557	63.9777	87.2625
ENSG00000182827	16.2034	18.0611	30.0929	12.4701	11.5394	6.14859	11.5534	13.8516	14.4617	11.7913	8.75137	9.20703
ENSG00000185155	0.334191	0.279572	0.179533	0.0197934	0.15811	0.18427	0.15046	0.152957	0.0762885	0.06235	0.136771	0.21085
ENSG00000183814	0.780316	1.17728	1.33498	1.20282	2.23665	3.18125	3.69496	5.5118	3.16376	3.38281	1.60508	2.16046
ENSG00000143799	9.1443	12.19	6.17299	7.01115	13.8942	13.2774	23.6298	41.9356	25.0107	23.6731	5.49535	5.61537
ENSG00000203685	0.0750912	0.0751557	0.0271981	0.0161924	0.0410458	0.00800504	0.114181	0.137634	0.299508	0.142928	0.497927	0.279328
ENSG00000143772	3.0364	3.58951	1.97783	0.919512	1.41014	1.08576	23.7949	28.8647	18.6058	31.0236	3.47474	2.67616
ENSG00000143801	11.6973	6.55914	11.8867	2.18363	3.66173	5.22112	39.753	38.144	26.3104	21.2678	4.99265	3.26759
ENSG00000163050	1.09164	1.78365	0.973941	1.23689	0.851719	0.747782	1.1126	2.47836	0.98597	0.69934	3.54126	2.96594
ENSG00000143776	13.5177	13.2926	13.0601	6.04293	17.5687	8.7398	11.8875	8.65821	7.24085	8.11295	6.8953	5.79861
ENSG00000181450	0.691962	0.789747	1.85773	1.58151	1.49329	1.5114	1.47968	1.34333	1.83297	1.25481	2.24846	2.19696
ENSG00000143740	5.70207	4.00178	5.66813	2.78542	3.41904	3.29404	3.79514	6.13963	3.98617	5.99267	4.78509	2.4949
ENSG00000081692	2.89635	2.67349	0.924462	0.945613	3.13128	1.52793	2.90442	2.76237	3.03629	2.35446	0.966729	0.89622
ENSG00000185888	0	0	0.0169723	0	0	0	0	0	0.0775572	0.00854905	0	0.0438925
ENSG00000143816	0.181899	0.108525	0.372612	0.0503572	0.0855089	0.0177235	0.0351893	0.0447845	0.0657422	0.0460322	0.226691	0.237914
ENSG00000154342	0.0360322	0.018857	0.00696812	0	0	0	0.00784943	0.0111143	0	0.0317023	0.13084	0.0717204
ENSG00000143761	80.5838	80.3351	135.295	55.2629	76.255	40.8129	89.5569	94.5167	73.5023	69.0734	25.4249	22.1617
ENSG00000143793	0.354062	0.701166	1.10368	1.52101	1.41982	0.320948	0.749541	0.777013	0.75666	0.903331	0.955413	0.269718
ENSG00000162910	4.16724	4.76006	4.04029	4.2125	4.95191	6.79499	6.99101	7.66636	9.24974	5.53302	2.37395	1.35897
ENSG00000143774	39.679	35.4175	33.515	33.0264	36.67	44.1549	28.938	24.529	45.4942	25.4429	10.8178	12.1356
ENSG00000198835	0.0762074	0.149251	0.138242	0.0858906	0.02238	0.568014	0	0.0293564	0.0520985	0.0187111	0.332608	0.213671
ENSG00000203684	0	0	0	0	0.274333	0	0	0	0	0	0	0.460322
ENSG00000181873	0.540838	0.474651	1.04214	0.668583	0.451573	1.04451	0.492904	0.409915	0.378377	0.308832	0.752478	0.521588
ENSG00000162913	0	0	0.151077	0.231268	0.18173	0.308271	0.0565719	0.0595289	0.0285718	0	1.3403	0.0817342
ENSG00000154358	0.269991	0.348717	0.0877843	0.131729	0.303771	0.337265	0.235224	0.257181	0.12114	0.0626896	1.14007	0.749045
ENSG00000154370	0.838945	1.03614	2.24477	2.32625	1.53726	1.78324	1.28525	3.35546	1.14989	1.57331	1.96107	0.435606
ENSG00000162931	0.100204	0.21812	1.10544	1.24326	0.250656	0.559953	0.249003	0.498151	0.166957	0.120467	0.17164	0.16733
ENSG00000168148	0.555004	0.592872	0.334892	1.41438	1.27836	2.49066	2.1608	3.12476	2.29274	1.67343	0.290896	0.110506
ENSG00000181218	0.931882	1.27313	0.896669	1.67762	2.93734	8.83625	5.59337	10.6331	9.21062	6.21542	0.319104	0.198947
ENSG00000196890	3.106	6.49352	6.30274	8.56607	16.1244	30.7652	27.0034	80.4496	34.2114	33.6327	6.19185	3.60666
ENSG00000168159	5.79524	7.83995	12.4152	10.2115	6.38552	4.36137	7.9455	14.2164	8.68714	10.4263	4.42576	4.18579
ENSG00000116574	1.60234	1.85985	0.203073	0.0575941	0.205093	0.0427522	0.156027	0.0589836	0.213073	0.103544	0.843432	0.676129
ENSG00000177800	0.21058	0.303226	0.33172	0.407148	0.41589	0.202427	0.307067	0.360784	0.387832	0.198218	0.64738	0.365937
ENSG00000168118	7.03542	6.40562	7.57377	2.50792	4.90005	3.8124	7.48988	5.72751	4.84893	4.93892	5.00134	4.99299
ENSG00000213029	3.50911e-07	1.09225e-06	4.65463e-08	3.93639e-08	7.19946e-08	2.45852e-08	5.86137e-07	7.12844e-07	3.19369e-07	1.11453e-07	4.21856e-07	3.02546e-06
ENSG00000154429	0.624342	1.2598	5.05381	2.4633	1.77087	1.51018	3.27008	6.26059	2.97168	3.48145	4.16474	5.3003
ENSG00000143632	1.19897	3.07731	2.83837	0.690503	2.06469	0.850579	1.29216	3.61103	1.47201	1.7045	0.781875	0.495696
ENSG00000069248	10.1302	10.4066	13.205	9.5698	13.8401	9.82951	14.6607	16.3243	13.7338	12.9742	10.0969	9.90692
ENSG00000135776	5.46363	5.41834	4.62978	2.59682	3.70523	4.35876	7.34991	6.67772	5.32861	5.40575	3.7585	3.84618
ENSG00000135801	6.26533	4.39571	5.77464	2.16659	4.28226	3.86941	6.31901	6.9421	3.9314	4.79561	2.60166	2.96187
ENSG00000135763	1.75893	1.88901	2.71956	2.70715	3.54203	3.42096	3.44805	5.28389	2.29574	2.84291	1.56727	1.80827
ENSG00000143641	17.2067	18.5944	7.5756	3.47993	7.84057	6.33703	31.7499	46.1729	28.5359	33.4738	3.22944	2.89169
ENSG00000177614	0.138987	0.297321	0.59416	0.147094	0.229929	0.278957	1.03252	3.68106	2.01251	1.14961	0.18746	0.215997
ENSG00000135775	4.49657	3.44773	6.43479	5.38551	7.078	6.73249	7.10413	6.74647	5.91562	7.41759	3.77071	3.67025
ENSG00000135744	0.111804	0.511017	0.0360541	0	0.0218907	0	0	0.028715	0.0932863	0	0	0.162519
ENSG00000135773	0.0403664	0	0	0.0606384	0.0237045	0.0538143	0.0219901	0.0310927	0.0224439	0.0336587	0	0
ENSG00000119280	25.9182	34.5895	8.68591	4.48598	3.29934	1.58755	17.6561	14.8518	19.7768	11.2173	6.04131	4.57485
ENSG00000143643	1.99776	2.19925	2.67039	1.68817	3.45404	3.39964	5.55732	5.03591	5.43052	4.81594	2.25437	3.62962
ENSG00000173409	11.1623	9.67356	20.7021	9.53185	13.4505	10.3193	16.9133	20.4474	18.8751	20.4384	9.173	7.92408
ENSG00000182118	4.46591	3.23536	13.402	5.21959	8.49419	6.31713	13.2151	13.3386	11.9913	10.5311	3.90928	3.47981
ENSG00000119283	0.0236571	0.10462	0.0783399	0.033403	0.0291989	0.0886708	0.0453861	0.0799473	0.0440221	0.0345487	0.089093	0.0907311
ENSG00000143633	3.43545	4.30742	5.07318	4.29612	4.78844	3.90526	4.16749	3.46376	4.44053	4.41488	2.61282	2.03298
ENSG00000116906	13.6882	14.3566	22.0634	14.2175	19.1705	10.1018	19.0785	17.713	18.6228	17.3243	10.4874	10.9828
ENSG00000116903	2.17033	2.17731	7.6519	2.57996	2.09732	2.63154	3.82686	4.12286	2.85983	3.33072	2.31045	3.53682
ENSG00000010072	2.97152	3.1508	6.34814	4.23181	3.92223	3.46015	4.88696	5.45043	4.96505	4.7838	2.61745	2.86757
ENSG00000135766	5.72977	5.56502	4.67282	4.12613	3.81735	2.74627	15.8981	21.0211	11.2041	12.2599	9.93217	6.49698
ENSG00000116918	19.6787	17.687	12.5884	6.4039	10.7877	9.35916	35.6505	32.7032	34.7973	33.1219	12.3732	10.3714
ENSG00000162946	0.658651	0.568958	0.176298	0.58792	0.261592	0.143587	2.36448	3.64166	2.1239	2.1412	1.68336	1.25247
ENSG00000116991	1.2939	0.89373	5.81695	2.08293	1.79008	1.37017	4.71886	7.31733	3.03665	3.41125	3.87765	3.70452
ENSG00000212916	0.751202	0.585477	0.239464	0.0805225	0.179508	0.114937	0.265734	0.347446	0.442554	0.383557	0.367034	0.302852
ENSG00000135778	5.51052	4.94138	9.88243	4.29822	8.58107	4.89613	5.32347	4.74667	7.05625	6.88113	3.76901	3.42544
ENSG00000135749	7.43074	5.14463	7.31307	2.87135	9.01045	5.21424	1.2076	2.18944	1.43488	1.78895	5.07211	5.8392
ENSG00000143674	0.488355	0.20145	2.15473	1.69623	2.91611	1.64667	0.215751	0.39155	0.316142	0.23205	1.34291	1.70663
ENSG00000135750	2.15204	1.57738	17.8496	5.15028	4.33538	7.54148	0.151088	0.25023	0.550812	0.156483	2.66228	3.00627
ENSG00000183780	0.0153338	0.0401078	0.341059	0.415281	1.61605	0.561761	0.0808746	0.0177337	0.0512245	0.0301595	0.123373	0.15266
ENSG00000168275	6.1266	6.9808	13.0969	4.15419	10.5102	5.35795	32.2129	25.0814	17.3838	19.1281	4.00462	3.59249
ENSG00000059588	2.10096	2.07536	3.52821	2.65874	3.19788	4.6922	7.296	5.86856	4.86196	5.11007	6.3343	6.41349
ENSG00000168264	2.84694	3.12351	8.4104	5.11567	5.50015	5.09694	1.66449	3.90455	2.36283	1.83021	10.9541	14.3718
ENSG00000173726	27.3863	24.8117	51.1281	18.9607	38.1504	18.5536	46.6033	47.6244	34.6823	42.9343	38.2332	25.7291
ENSG00000188739	10.7929	10.1072	16.7105	10.7392	16.866	8.04684	8.04774	8.91238	7.82783	8.22278	6.20241	6.50422
ENSG00000054267	5.08329	5.8657	5.68567	2.68048	3.24895	4.07533	3.87315	3.06343	3.38242	3.80099	7.44928	8.63028
ENSG00000152904	14.708	13.2344	18.4668	12.8001	22.3677	8.24202	14.1608	12.1314	12.596	12.4019	8.12676	7.29729
ENSG00000116957	8.3831	7.15765	7.72679	2.54341	9.77977	5.84296	10.7155	11.9068	9.48042	9.26064	3.23975	5.01831
ENSG00000162885	9.59906	5.62169	10.2173	6.16058	16.7706	12.2558	5.61445	7.18682	6.65654	5.5873	6.83787	6.66907
ENSG00000168243	0.264026	0.296336	0.353017	0.131753	0.192693	0.19891	0.132935	0.152678	0.144108	0.134904	0.259556	0.765011
ENSG00000143669	6.77773	5.82607	10.4685	3.72447	5.18119	3.90134	39.9007	28.894	22.3913	30.0064	12.7127	14.4723
ENSG00000116962	2.90775	7.56776	0.112604	0.0366868	0.0542372	0.0229224	4.24038	11.4379	3.04761	4.97273	3.23678	3.31235
ENSG00000077585	5.46236	4.15627	1.76803	0.671782	0.87581	1.6873	9.62512	23.2556	9.20748	12.8793	4.43031	4.09802
ENSG00000086619	4.40027	2.58182	4.48233	2.99402	3.90749	1.60816	2.61655	2.96424	2.71626	2.27244	2.9583	2.02399
ENSG00000186197	3.70481	4.31558	4.1856	4.50593	12.8127	6.77591	4.64098	6.36438	8.86727	6.68334	2.49206	2.51236
ENSG00000116977	21.7059	13.5323	29.2142	14.7189	11.924	8.25482	19.8471	25.6381	22.7301	14.2064	20.3645	26.6688
ENSG00000119285	11.8034	13.3323	18.3363	9.22518	21.7742	12.6049	8.65628	15.8542	7.60071	12.6344	9.86769	9.06276
ENSG00000077522	0.112392	0.233043	0.20374	0.0583988	0.131258	0.130226	0.0845042	0.388793	0.121062	0.0605571	0.100614	0.0396587
ENSG00000116984	9.35441	9.22695	3.74804	1.72411	6.84278	5.53818	8.9906	10.697	9.5213	8.30087	7.04045	5.64376
ENSG00000244020	0.181025	0.368371	0.0209542	0	0.223489	0.181968	0.151987	0.192195	0.280485	0.293584	0	0.0634021
ENSG00000198626	0.00682877	0.0502968	0.0183497	0.0212138	0.0938796	0.0250607	0.0372395	0.018615	0.076704	0.0746857	0.42313	0.426363
ENSG00000116996	0.156244	0.00782889	0.401405	0.324578	0.451419	0.152225	0.0130972	0.0601289	0	0.0471313	0	0
ENSG00000270188	126.741	259.617	99.229	129.002	282.615	187.742	206.616	215.635	307.442	412.135	54.7288	53.1047
ENSG00000133019	1.00909	0.12244	0.0660313	0.0674722	0.0724811	0.0674901	0.0917338	0.110576	0.0724226	0.08304	0.349316	0.265372
ENSG00000155816	14.2231	8.48661	0.181308	0.188999	0.198218	0.297185	0.167702	0.244681	0.683203	0.498608	0.500912	0.181089
ENSG00000268365	0	0	0	0	0	0	0	0	0	0	0	0
ENSG00000180875	24.3321	22.0134	0.731223	0.759012	0.447181	0.544228	0.303818	0.935689	1.25001	0.698446	1.84034	1.60704
ENSG00000182901	2.94404	3.58765	1.26068	1.27342	1.13155	0.874831	0.649465	0.957335	0.880768	0.938452	2.1763	2.98143
ENSG00000091483	28.5626	34.2418	12.8602	7.58235	28.8688	21.6952	36.7986	49.91	35.0908	39.3103	9.95785	13.2646
ENSG00000117009	0.0574837	0.106018	0.0710896	0.153799	0.116997	0.0648632	0.78816	1.02462	0.177382	1.26201	0.333986	0.0613685
ENSG00000054277	4.0125	2.61267	2.13332	2.22099	2.84612	1.35307	5.85122	6.53165	7.39254	5.25037	2.76872	3.71149
ENSG00000203668	1.98428	2.44074	2.38234	1.11597	1.67634	1.49728	4.26573	5.67499	2.54454	4.7122	3.86882	3.03937
ENSG00000162843	0.0216492	0.0141849	0.010462	0.0278166	0.0475041	0	0.0220009	0.0376643	0.0120687	0	0	0.050407
ENSG00000174371	1.8891	3.74668	0.475929	0.241409	1.97903	4.68804	10.3039	27.2993	9.97629	13.4525	0.973352	1.96322
ENSG00000197769	0.0620278	0.162281	0.155878	0.054856	0.0841574	0.0416798	0.0876902	0.194549	0.0895701	0.0577095	0.210447	0.299013
ENSG00000180287	0.0539307	0.0469649	0.509599	1.5271	0.574963	0.228987	0	0.0673422	0.402985	0.0176616	0.0482619	0
ENSG00000143702	32.333	28.0074	4.83132	2.36762	8.92186	6.65115	32.4486	30.0422	26.8821	28.2666	9.92933	8.29751
ENSG00000269795	0	0	0	0	0	0	0	0	0	0	0	0
ENSG00000054282	14.0528	11.1314	5.13471	7.86577	13.8096	9.21768	4.76687	6.95135	5.79728	7.77038	5.96295	5.65143
ENSG00000117020	20.7778	18.1732	1.2145	0.835378	1.21488	1.30085	11.3955	19.6548	12.7471	12.9723	8.63433	6.85005
ENSG00000179456	1.48565	1.27895	1.3826	0.675739	1.00178	1.05492	1.91023	2.66528	1.94683	1.81211	2.57766	2.1019
ENSG00000268146	0.0165722	0.00256028	0.00566788	0.0176651	0.0137924	0.0349858	0.0203608	0.0281499	0.00130719	0.0115478	0.0177969	0.0344129
[truncated: 20,586 more rows]
